# Supplementary material
Source: PubMed Central journal article supplement (PMC6338844)
Supplement: pnas.1816822116.sapp.pdf [file pnas.1816822116.sapp.pdf]

## SI Appendix for

### **A novel genetic code and record-setting AT-richness in the highly reduced plastid genome of the holoparasitic plant *Balanophora***

Huei-Jiun Su, Todd J. Barkman, Weilong Hao, Samuel S. Jones, Julia Naumann, Elizabeth Skippington, Eric K. Wafula, Jer-Ming Hu, Jeffrey D. Palmer\* and Claude W. dePamphilis\*

\*Corresponding authors. E-mail: [jpalmer@indiana.edu](mailto:jpalmer@indiana.edu) and [cwd3@psu.edu](mailto:cwd3@psu.edu)

#### **This PDF includes:**

SI Materials and Methods

SI Results

SI References

Table S1 to S12

Figure S1 to S14

## SI Materials and Methods

**GC content, codon usage, and amino-acid usage.** The analyses of gene-by-gene GC content in Fig. S5 and gene-wide GC content and codon usage in Table S5 were performed on the two *Balanophora* plastomes and plastid, mitochondrial, or bacterial genomes from 28 other taxa (no AT-rich nuclear genomes were analyzed because of their incompleteness and large sizes). These taxa were selected as follows (see Table S12 for full names and accession numbers): *Zinderia* has the most AT-rich bacterial genome sequenced, *Carsonella* is 2nd-most AT-rich, and *Nasuia* is 3rd-most excluding other *Carsonella* isolates. All three bacteria have highly reduced genomes and are obligate intracellular symbionts of insects. The mitochondrial genome of the yeast *Nakaseomyces* is the most AT-rich genome described to date in any organism. The yeast *Saccharomyces cerevisiae* YJM1447 has the most AT-rich of the many sequenced and annotated *Saccharomyces* mitochondrial genomes. *Rozella* has the most AT-rich mitochondrial genome in fungi apart from the yeasts. The insect *Diadegma* has the most AT-rich animal mitogenome and 3rd-most overall. *Radopholus* has the most AT-rich nematode genome. *Monosiga*, *Ichthyophthirius*, and *Acrasis* have the most AT-rich “protist” genomes and represent three different phyla. The four apicomplexans possess the most AT-rich and fully sequenced plastomes from each of four phylogenetically disparate genera of the group. The nine most AT-rich, non-apicomplexan plastomes are from species whose full-plastome GC content is less than 24%; all but one of these plastomes (that of *Bulboplastis*) are from non-photosynthetic organisms. The other five plastomes are from all available non-photosynthetic organisms whose full-plastome GC content is between 24% and 30% (many photosynthetic plastomes are also in this GC range).

GenBank accession numbers of *B. laxiflora* mitochondrial genes assembled in this study and employed in codon-usage analysis are MK144465-MK144474. *Balanophora fungosa* nuclear sequences used for this purpose are from GenBank (JQ613229, JQ613232, JQ613242, JQ613262, JQ613269) and the 1KP database (scaffolds STKY 0018172, 0079935, 0095611, 0104504, 2000678, 2000811, 2001013, 2002472, 2002620, 2002847, 2003209, 2003887, 2003966, 2004417, 2005545, 2005849, 2006043, 2006503, 2007049, 2007203, 2007307, 2007505, 2007706, 2007890, 2008143, 2008354, 2008508, 2008673, 2008894, 2009559, 2010082, 2010496, 2010783, 2011060, 2011423, 2011655, 2011904, 2012280, 2012406, 2075101, 2075212, 2075289, 2075967, 2076149, 2076342, 2076680, 2077455, 2077652, 2077741, 2078058, 2078082, 2078577, 2078768, 2078866, 2078885, 2078962, 2079157, 2079236, 2079392, 2079434).

**Transcript analysis.** Total RNA was extracted from *B. laxiflora* developing female inflorescence tissue using Concert Plant reagent (Invitrogen, Carlsbad, CA, USA). Eleven *B. laxiflora* plastid genes were sufficiently GC-rich to enable design of effective PCR primers (Tables S10A and S11C). Complementary DNAs (cDNAs) were generated for these genes by RT-PCR amplification and sequenced using the Sanger method and the primers listed in Table S10.

To ensure that RT-PCR products were derived from RNA and not genomic DNA contamination, several controls were devised using RNA and DNA templates with various applications of RNase, DNase, and/or reverse transcriptase as in (1). In the case of DNA controls, total DNA was treated with RNase A. In the case of RNA controls, total RNA was treated with DNase I. Both DNase-treated RNA and RNase-treated DNA were used for cDNA synthesis reactions using the Maxima First Strand cDNA Synthesis

Kit following the manufacturer's protocol (Thermo Fisher Scientific). One  $\mu\text{g}$  of template RNA was used from the sample treated with DNase I as measured by a Qubit Fluorometer using the Qubit RNA BR Assay Kit (Thermo Fisher Scientific) with a corresponding volume taken from the sample treated with RNase A. RNA digestions were performed in solution with 300  $\mu\text{g}$  RNase A at 37°C for one hour and subsequently purified using the DNeasy Spin Column (Qiagen). DNase digestions were performed following Appendix C of the RNeasy MinElute Clean-up Handbook (Qiagen). PCR amplification of single-stranded cDNA was performed using DreamTaq Green PCR Master Mix, with primer molarity of 0.5  $\mu\text{M}$  and template concentration of 0.2 ng/ $\mu\text{l}$ . Thermal cycling parameters varied widely (Table S11) due to the extreme A+T content of most genes, which required substantially lowered melting and extension temperatures in most cases (2). Gel electrophoresis was performed on all amplified products using a 1.5% agarose gel containing 0.5X SyberSafe dye (Life Technologies).

As an additional source of *Balanophora* cDNA sequences, the *B. fungosa* transcriptome assemblies from the 1KP project ([http://www.onekp.com/public\\_data.html](http://www.onekp.com/public_data.html)) were used as queries in BLASTn (E-value =  $1e^{-10}$ ) searches against a database of 626 plastomes, including the *Balanophora* plastomes from this study.

**Microscopy.** For light microscopy, sections of basal floral bracts, inflorescence stalks, and tubers from *B. yakushimensis* were stained with either Sudan black or iodine solution. The Sudan-black solution contained 0.3% Sudan black dissolved in 70% ethanol; tissues were stained for 10 minutes at room temperature and washed with distilled water. The iodine solution consisted of 2% KI and 1%  $\text{I}_2$ ; tissues were stained for 5 minutes without washing. For transmission electron microscopy, basal bract tissues of *B. laxiflora* and *B. yakushimensis* were fixed with 2.5% glutaraldehyde in 0.1 M sodium phosphate buffer (pH 7.0) at 4°C for 24 hours. After three 20-min buffer rinses, the samples were post-fixed in 1%  $\text{OsO}_4$  in the same buffer for 4 hours at room temperature and then rinsed in three 20-min buffer changes. Samples were first dehydrated in an ethanol series and then treated with propylene oxide, embedded in Spurr's resin, and sectioned with a Leica EM UC6 or UC7 ultramicrotome. The resulting sections, of 70-90 nm thickness, were stained with uranyl acetate and lead citrate. Sections were observed using a FEI Tecnai Spirit Transmission Electron Microscope at 80 KV and photographed using a Gatan Orius CCD camera.

## SI Results

**The extraordinarily divergent *ycf2* gene.** In all respects, the most divergent gene in *Balanophora* plastomes is *ycf2*. This ca. 750-bp ORF is remarkably shrunken compared to all other annotated *ycf2* genes (of typically 5,100-6,900-bp length) owing to numerous large deletions across its length (Figs. S4, S12, and S13). YCF2 is only 52% identical between *B. laxiflora* and *B. reflexa*, making it the most sequence-divergent protein encoded by *Balanophora* plastomes (Table S2, Figs. S4, S12, and S13). At 2.5% and 2.2% GC in *B. laxiflora* and *B. reflexa*, respectively, *ycf2* is also the most AT-rich gene in *Balanophora*. Remarkably, GC content in the two *ycf2* genes is almost two times lower than in intergenic and intronic regions of their respective plastomes (Table S1). Because our analyses of *Balanophora ycf2* indicate that it is by far the most unusual form of the gene ever reported as likely functional, we present an extended discussion of its annotation and potential functionality in the context of what is known from other plants.

First, *ycf2* is located between *rpl2* and *rps7* in *Balanophora*, exactly where it should be given that gene order is highly conserved between *Balanophora* and the much larger plastomes of photosynthetic angiosperms (Fig. S1). Thus, although it is highly shrunken and divergent in sequence, this ORF is likely to be *ycf2* in terms of synteny.

Second, despite its extreme length, base-compositional, and sequence divergence, *Balanophora ycf2* contains two of three putatively functional motifs identified as conserved between land plant YCF2 and the CDC48 family of ATPases (3). The three recognized motifs constitute the only hint of a clue as to the function of the enigmatic *ycf2*, the largest and most poorly conserved plastid gene, but an essential one (4) thought to have been acquired by the plastome in the common ancestor of land plants (5). These motifs are marked on the YCF2 multiple sequence alignments shown in Figs. S4 and S12. Although Walker motif A is likely absent, Walker motif B is present in *Balanophora* and corresponds to a putative nucleotide-binding site. The so called “DPAL” motif is also present in *Balanophora*. Although there is no assigned role for this motif, it was identified as of probable functional importance through its evident homology to the CDC48 family (3). These two motifs that are present in *Balanophora* YCF2 also correspond to the two best-conserved regions of the entire YCF2 protein of land plants (Fig. S4).

Third, the extraordinary divergence and AT-richness of *Balanophora ycf2* is entirely in keeping with what’s known about this gene in many other plastid genomes; the *Balanophora* case is simply more extreme. The exceptional nature of *ycf2* was first recognized in 1991 (6) when only two *ycf2* sequences were available, from the angiosperm *Nicotiana* and the bryophyte *Marchantia*. This prescient paper showed that at 17.9% GC, *ycf2* is the most AT-rich gene in the *Marchantia* plastome and that it shares only local homology to *Nicotiana*. A 1994 analysis (7) of the five *ycf2* sequences then available (from *Marchantia* and four angiosperms) extended these conclusions, showing that indel rates are extremely high in YCF2, with gaps occurring at 39% of alignment positions despite little variation in overall protein size (2109-2280 residues), and that amino-acid identity between *Marchantia* and the angiosperms is extremely low (27% overall) and barely greater than expected for random sequences over the first 1000-1500 residues of the protein. These observations led to the conclusion that the protein is under selective constraint in spite of its high divergence and AT bias (7). Thus, if any plastid gene could be expected to be as divergent and AT-rich as the *Balanophora* ORF, it is *ycf2*.

Fourth, although *ycf2* is extraordinarily AT-rich in *Balanophora*, there is evidence for weak purifying selection operating on it within the genus ( $d_N/d_S = 0.82$  for the alignment shown in Fig. S4). Although this is the highest  $d_N/d_S$  for the *Balanophora* plastome genes, weak constraint on *ycf2* is typical in land plants (8-12). Furthermore, given its nearly 98% AT composition, if *Balanophora ycf2* wasn’t under selective constraint, it should be riddled with stop codons and frameshifts as is expected for pseudogenes and non-coding DNA, in general. This expectation is met for non-coding plastome DNA in *Balanophora* as the 751 bp of spacer and intronic DNA in *B. laxiflora* contains an average of 27 stop codons across the six potential open reading frames (most are TAA codons, of course) (Table S4). In contrast, there is but a single canonical stop (an in-frame TAG in *B. reflexa ycf2*) in the 750 and 771 bp of *Balanophora laxiflora* and *B. reflexa ycf2* sequence, respectively. This single TAG codon, as explained in the main text, does not function as a stop codon but has been reassigned in the *Balanophora* plastome to encode Trp. Thus, in spite of the relatively high  $d_N/d_S$  estimate, *ycf2* in *Balanophora* is likely functional.

These four sets of considerations lead us to conclude that the *Balanophora* plastome contains an extraordinarily divergent but likely functional *ycf2* gene. Although the roughly 8-fold shrinkage of *ycf2* in *Balanophora*, is at first reaction very surprising, this must be viewed in the perspective of its plastid genome overall. As shown in Fig. S4 and Table S1, almost all *Balanophora* plastid protein genes are shorter than normal, with *accD*, *ycf1*, and *rps18* ranging from 38 to 53% shorter than homologs in *Schoepfia*, a hemiparasitic relative of *Balanophora*. Viewed this way, *Balanophora ycf2* is simply the most extreme point on a more-or-less continuum of divergence in length, sequence, and base composition, within this highly aberrant plastome.

**Stop codon and TGG usage in the *Cytinus* plastome.** We analyzed the published genome of *Cytinus hypocystis* [GenBank # KT335971, (13)] and found that its 16 protein genes all use TAA as a stop codon, i.e., there are no TAG- or TGA stops in this plastome (Table S8). Inspection of amino-acid alignments revealed, in stark contrast to the *Balanophora* situation, an absence of internal TAG (or TGA) codons and the presence of 22 internal TGG codons, all but one of which are located at sites at which TGG (tryptophan in the canonical code) is present in most or all of the diverse land plants in the alignments (Table S8). Therefore, as described in the main text, *Cytinus* appears to still use TGG as a Trp codon despite possessing the antecedent condition for a code change in which TAG (or TGA) has been reassigned from stop to Trp.

## SI References

1. Naumann J, *et al.* (2016) Detecting and characterizing the highly divergent plastid genome of the nonphotosynthetic parasitic plant *Hydnora visseri* (Hydnoraceae). *Genome Biol Evol* 8:345-363.
2. Su XZ, Wu Y, Sifri CD, Wellem TE (1996) Reduced extension temperatures required for PCR amplification of extremely A+T-rich DNA. *Nucleic Acids Res* 24:1574-1575.
3. Wolfe KH (1994) Similarity between putative ATP-binding sites in land plant plastid ORF2280 proteins and the FtsH/CDC48 family of ATPases. *Curr Genet* 25:379-383.
4. Drescher A, *et al.* (2000) The two largest chloroplast genome-encoded open reading frames of higher plants are essential genes. *Plant J* 22:97-104.
5. Wicke S, *et al.* (2011) The evolution of the plastid chromosome in land plants: gene content, gene order, gene function. *Plant Mol Biol* 76:273-297.
6. Shimada H, Sugiura M (1991) Fine structural features of the chloroplast genome: comparison of the sequenced chloroplast genomes. *Nucleic Acids Res* 19:983-995.
7. Downie SR, *et al.* (1994) Structure and evolution of the largest chloroplast gene (ORF2280): internal plasticity and multiple gene loss during angiosperm evolution. *Curr Genet* 25:367-378.
8. Sloan DB, *et al.* (2014) A recurring syndrome of accelerated plastid genome evolution in the angiosperm tribe Sileneae (Caryophyllaceae). *Mol Phylogenet Evol* 72:82-89.
9. Wicke S, Schaferhoff B, dePamphilis CW, Muller KF (2014) Disproportional plastome-wide increase of substitution rates and relaxed purifying selection in genes of carnivorous Lentibulariaceae. *Mol Biol Evol* 31:529-545.

10. Barrett CF, Davis JI (2012) The plastid genome of the mycoheterotrophic *Corallorhiza striata* (Orchidaceae) is in the relatively early stages of degradation. *Am J Bot* 99:1513-1523.
11. Raman G, Park S (2015) Analysis of the complete chloroplast genome of a medicinal plant, *Dianthus superbus* var. *longicalyncinus*, from a comparative genomics perspective. *PLoS One* 10:e0141329.
12. Zhang H, Li C, Miao H, Xiong S (2013) Insights from the complete chloroplast genome into the evolution of *Sesamum indicum* L. *PLoS One* 8:e80508.
13. Roquet C, *et al.* (2016) Understanding the evolution of holoparasitic plants: the complete plastid genome of the holoparasite *Cytinus hypocistis* (Cytinaceae). *Ann Bot* 118:885-896.
14. Kohchi T, *et al.* (1988) A nicked group II intron and trans-splicing in liverwort, *Marchantia polymorpha*, chloroplasts. *Nucleic Acids Res* 16:10025-10036.
15. Akashi H, Gojobori T (2002) Metabolic efficiency and amino acid composition in the proteomes of *Escherichia coli* and *Bacillus subtilis*. *Proc Natl Acad Sci USA* 99:3695-3700.
16. Sullivan MJ, Petty NK, Beatson SA (2011) Easyfig: a genome comparison visualizer. *Bioinformatics* 27:1009-1010.
17. Giege R, Sissler M, Florentz C (1998) Universal rules and idiosyncratic features in tRNA identity. *Nucleic Acids Res* 26:5017-5035.
18. Lowe TM, Eddy SR (1997) tRNAscan-SE: a program for improved detection of transfer RNA genes in genomic sequence. *Nucleic Acids Res* 25:955-964.
19. Juhling F, *et al.* (2012) Improved systematic tRNA gene annotation allows new insights into the evolution of mitochondrial tRNA structures and into the mechanisms of mitochondrial genome rearrangements. *Nucleic Acids Res* 40:2833-2845.
20. Krumsiek J, Arnold R, Rattei T (2007) Gepard: a rapid and sensitive tool for creating dotplots on genome scale. *Bioinformatics* 23:1026-1028.
21. Howe CJ, Smith A (1991) Plants without chlorophyll. *Nature* 349:109-109.
22. Barbrook AC, Howe CJ, Purton S (2006) Why are plastid genomes retained in non-photosynthetic organisms? *Trends Plant Sci* 11:101-108.
23. Wolfe KH, Morden CW, Palmer JD (1992) Function and evolution of a minimal plastid genome from a nonphotosynthetic parasitic plant. *Proc Natl Acad Sci USA* 89:10648-10652.

**Table S1. Length and GC content of plastid genes in *Balanophora* and *Schoepfia***

|                          | <i>accD</i> | <i>clpP</i> | <i>ycf1</i> | <i>ycf2</i> | <i>rps2</i> | <i>rps3</i> | <i>rps4</i> | <i>rps7</i> | <i>rps11</i> | <i>rps12</i> | <i>rps14</i> | <i>rps18</i> | <i>rps19</i> | <i>rpl2</i> | <i>rpl14</i> | <i>rrn4.5</i> | <i>rrn16</i> | <i>rrn23</i> | <i>trnE</i> | CDS*   | Full length |
|--------------------------|-------------|-------------|-------------|-------------|-------------|-------------|-------------|-------------|--------------|--------------|--------------|--------------|--------------|-------------|--------------|---------------|--------------|--------------|-------------|--------|-------------|
| <b>Length (bp)</b>       |             |             |             |             |             |             |             |             |              |              |              |              |              |             |              |               |              |              |             |        |             |
| <i>S. jasminodora</i>    | 1,485       | 591         | 5,490       | 6,777       | 711         | 657         | 606         | 468         | 417          | 372          | 303          | 357          | 279          | 825         | 369          | 103           | 1,491        | 2,810        | 73          | 58,791 | 118,743     |
| <i>B. laxiflora</i>      | 894         | 600         | 2,943       | 750         | 558         | 624         | 588         | 429         | 372          | 366          | 210          | 171          | 249          | 750         | 357          | 88            | 1,474        | 2,930        | 75          | 9,861  | 15,505      |
| <i>B. reflexa</i>        | 951         | 606         | 2,691       | 771         | 549         | 624         | 525         | 408         | 372          | 372          | 204          | 165          | 219          | 768         | 345          | 90            | 1,573        | 3,052        | 71          | 9,570  | 15,507      |
| % reduction <sup>†</sup> | 37.9        | -           | 48.7        | 88.8        | 22.2        | 5.0         | 8.2         | 10.6        | 10.8         | 0.8          | 31.7         | 52.9         | 16.1         | 8.0         | 4.9          | 13.6          | -            | -            | -           | 83.5   | 86.9        |
| <b>GC content (%)</b>    |             |             |             |             |             |             |             |             |              |              |              |              |              |             |              |               |              |              |             |        |             |
| <i>S. jasminodora</i>    | 34.8        | 40.6        | 30.4        | 37.0        | 37.7        | 33.9        | 39.1        | 40.2        | 44.1         | 41.4         | 42.2         | 34.2         | 34.8         | 43.0        | 37.1         | 53.4          | 56.5         | 55.0         | 57.5        | 38.0   | 38.1        |
| <i>B. laxiflora</i>      | 17.6        | 19.7        | 4.9         | 2.0         | 4.8         | 5.6         | 9.0         | 5.4         | 11.8         | 20.2         | 8.1          | 4.1          | 6.4          | 14.3        | 10.4         | 13.6          | 24.0         | 19.9         | 29.3        | 8.9    | 12.2        |
| <i>B. reflexa</i>        | 16.2        | 19.5        | 5.2         | 2.2         | 4.0         | 5.0         | 6.1         | 4.9         | 11.6         | 19.6         | 6.9          | 4.2          | 7.3          | 13.9        | 10.4         | 10.0          | 21.0         | 18.6         | 31.0        | 8.7    | 11.6        |

\*CDS: Protein coding sequences. Note that these values exceed the actual total number of protein-coding nucleotides in these plastomes as a consequence of gene overlaps (see main text and Table S4).

<sup>†</sup>(1 - (average length of *Balanophora*/length of *Schoepfia*)) x 100%. Dashes indicate the three genes that are larger in *Balanophora* than in *Schoepfia*.

**Table S2. Plastid gene divergence between *B. laxiflora* and *B. reflexa***

|                             | <i>accD</i> | <i>clpP</i> | <i>ycf1</i> | <i>ycf2</i> | <i>rps2</i> | <i>rps3</i> | <i>rps4</i> | <i>rps7</i> | <i>rps11</i> | <i>rps12</i> | <i>rps14</i> | <i>rps18</i> | <i>rps19</i> | <i>rpl2</i> | <i>rpl14</i> | <i>rrn4.5</i> | <i>rrn16</i> | <i>rrn23</i> | <i>trnE</i> |
|-----------------------------|-------------|-------------|-------------|-------------|-------------|-------------|-------------|-------------|--------------|--------------|--------------|--------------|--------------|-------------|--------------|---------------|--------------|--------------|-------------|
| % nucleotide identity       | 93.6        | 93.5        | 80.2        | 75.2        | 79.9        | 86.5        | 81.7        | 85.8        | 90.2         | 93.1         | 79.8         | 88.1         | 91.4         | 88.6        | 91.2         | 94.1          | 90.5         | 87.9         | 95.8        |
| % amino acid identity       | 89.6        | 89.5        | 62.4        | 51.7        | 65.7        | 72.7        | 68.2        | 75.2        | 82.0         | 90.0         | 56.1         | 77.4         | 82.9         | 80.4        | 82.5         | -             | -            | -            | -           |
| Pairwise $d_N$ <sup>†</sup> | 0.06        | 0.05        | 0.22        | 0.32        | 0.22        | 0.14        | 0.20        | 0.15        | 0.07         | 0.05         | 0.23         | 0.11         | 0.08         | 0.09        | 0.08         | -             | -            | -            | -           |
| Pairwise $d_S$ <sup>†</sup> | 0.40        | 0.49        | 0.50        | 0.39        | 0.43        | 0.30        | 0.28        | 0.30        | 0.35         | 0.52         | 0.36         | 0.31         | 0.25         | 0.77        | 0.20         | -             | -            | -            | -           |
| Pairwise $d_N/d_S$          | 0.14        | 0.09        | 0.44        | 0.82        | 0.52        | 0.48        | 0.72        | 0.49        | 0.20         | 0.09         | 0.65         | 0.38         | 0.32         | 0.11        | 0.40         | -             | -            | -            | -           |

\*Gaps were excluded from all identity calculations.

<sup>†</sup>TAG codons were excluded from the  $d_N$  and  $d_S$  calculations.



**Table S3. Annotated start and stop codons in *Balanophora* plastomes**

| Gene         | Start codon*        |                   | Stop codon*         |                   |
|--------------|---------------------|-------------------|---------------------|-------------------|
|              | <i>B. laxiflora</i> | <i>B. reflexa</i> | <i>B. laxiflora</i> | <i>B. reflexa</i> |
| <i>accD</i>  | ATG                 | ATG               | TAA                 | TAA               |
| <i>clpP</i>  | ATG                 | ATG               | TAA                 | TAA               |
| <i>rpl14</i> | ATG                 | ATG               | TAA                 | TAA               |
| <i>rpl2</i>  | ATG                 | ATG               | <b>TGA</b>          | <b>TGA</b>        |
| <i>rps11</i> | ATG                 | ATG               | TAA                 | TAA               |
| <i>rps12</i> | ATG                 | ATG               | TAA                 | TAA               |
| <i>rps14</i> | ATG                 | ATG               | TAA                 | TAA               |
| <i>rps18</i> | ATG                 | ATG               | TAA                 | TAA               |
| <i>rps19</i> | ATG                 | ATG               | TAA                 | TAA               |
| <i>rps2</i>  | ATG                 | ATG               | TAA                 | TAA               |
| <i>rps3</i>  | ATG                 | ATG               | TAA                 | TAA               |
| <i>rps4</i>  | <b>ATA</b>          | <b>ATT</b>        | TAA                 | TAA               |
| <i>rps7</i>  | ATG                 | ATG               | TAA                 | TAA               |
| <i>ycf1</i>  | ATG                 | ATG               | TAA                 | TAA               |
| <i>ycf2</i>  | ATG                 | <b>ATA</b>        | TAA                 | TAA               |

\*non-ATG start codons and non-TAA stop codons are in bold.

**Table S4. Intergenic regions in *Balanophora* plastomes**

| Region                     | Size*<br>(bp) | %GC  | Note                                             | Reading frame <sup>†</sup> |       |       |       |       |       | Sequence                                                                                                                                                                                                                         |
|----------------------------|---------------|------|--------------------------------------------------|----------------------------|-------|-------|-------|-------|-------|----------------------------------------------------------------------------------------------------------------------------------------------------------------------------------------------------------------------------------|
|                            |               |      |                                                  | 1                          | 2     | 3     | -1    | -2    | -3    |                                                                                                                                                                                                                                  |
| <b><i>B. laxiflora</i></b> |               |      |                                                  |                            |       |       |       |       |       |                                                                                                                                                                                                                                  |
| <i>rm4.5-ycf1</i>          | 219           | 7.8  |                                                  | 9/1/0                      | 7/1/0 | 6/0/0 | 8/1/2 | 7/0/0 | 1/1/0 | AAT TAAATAATAACTACTATATGTTTTATATATATTTGGTATTTTAA<br>AAATAAAAAATACAT TAAAAATAAAATCTATTTCAAAT TAAATGG<br>TAAAAATTTATATATATAATATATATAAT TAAAAATAAATTTAATATC<br>AAAAATATAAATACTTTTAGTATAGTATAAAATAAAAAAGGAGGTTA<br>ATAATTTAAAAATAAAA |
| <i>ycf1-rpl14</i>          | (14)          | -    | gene overlap                                     | -                          | -     | -     | -     | -     | -     |                                                                                                                                                                                                                                  |
| <i>rpl14-rps2</i>          | 1             | 0.0  |                                                  | -                          | -     | -     | -     | -     | -     | T                                                                                                                                                                                                                                |
| <i>rps2-trnE</i>           | 12            | 0.0  |                                                  | 0/0/0                      | 0/0/0 | 1/0/0 | 0/0/0 | 1/0/0 | 1/0/0 | ATTTTTAATAT                                                                                                                                                                                                                      |
| <i>trnE-rps14</i>          | 20            | 0.0  |                                                  | 1/0/0                      | 0/0/0 | 0/0/0 | 1/0/0 | 0/0/0 | 1/0/0 | TTTTATTATATATATAAT                                                                                                                                                                                                               |
| <i>rps14-rps4</i>          | (7)           | -    | gene overlap                                     | -                          | -     | -     | -     | -     | -     |                                                                                                                                                                                                                                  |
| <i>rps4-accD</i>           | 83            | 2.4  |                                                  | 3/0/0                      | 5/0/0 | 1/0/1 | 3/0/0 | 2/0/0 | 7/0/0 | ATATTATTATTAAAT TAAAT TAATAATAATAAAAAATAATGATTATCT<br>TTTTAATTAATTTTAAITTTTATTATT                                                                                                                                                |
| <i>accD-rps18</i>          | 5             | 0.0  |                                                  | 0/0/0                      | 0/0/0 | 0/0/0 | 1/0/0 | 0/0/0 | 0/0/0 | TTTTA                                                                                                                                                                                                                            |
| <i>rps18-rps12_5'</i>      | 164           | 6.7  | trans-spliced<br>intron<br>excluded <sup>‡</sup> | 7/1/1                      | 3/0/0 | 2/0/0 | 5/0/1 | 3/0/0 | 6/2/0 | AATTAATATAGTATTTAATATATATTTAATATTTAAATCCAATATAAAA<br>TATATATTTCTTTTCTACTATAATATTCATTTTTATT TTTATAA<br>ACATAATAAATTTATATATTATTATAATTTAATTTAAATTTTGAGTATTT<br>TTATAAATAT                                                           |
| <i>rps12-clpP</i>          | 13            | 0.0  |                                                  | 1/0/0                      | 1/0/0 | 0/0/0 | 2/0/0 | 0/0/0 | 0/0/0 | TAATTTATAATTA                                                                                                                                                                                                                    |
| <i>clpP-rps11</i>          | 60            | 0.0  |                                                  | 3/0/0                      | 0/0/0 | 5/0/0 | 4/0/0 | 3/0/0 | 3/0/0 | AATAATTAATATTTAATAATTAATTTATTTAATAATTAATATTAT<br>TTATATTA                                                                                                                                                                        |
| <i>rps11-rps3</i>          | 8             | 0.0  |                                                  | 0/0/0                      | 0/0/0 | 0/0/0 | 0/0/0 | 0/0/0 | 1/0/0 | TTATTTTT                                                                                                                                                                                                                         |
| <i>rps3-rps19</i>          | 3             | 0.0  |                                                  | 0/0/0                      | -     | -     | 1/0/0 | -     | -     | AAT                                                                                                                                                                                                                              |
| <i>rps19-rpl2</i>          | (4)           | -    | gene overlap                                     | -                          | -     | -     | -     | -     | -     |                                                                                                                                                                                                                                  |
| <i>rpl2-ycf2</i>           | 23            | 0.0  |                                                  | 3/0/0                      | 0/0/0 | 0/0/0 | 0/0/0 | 1/0/0 | 0/0/0 | TAATAAAAAATAATATATAAAA                                                                                                                                                                                                           |
| <i>ycf2-rps7</i>           | 2             | 0.0  |                                                  | -                          | -     | -     | -     | -     | -     | AT                                                                                                                                                                                                                               |
| <i>rps7-rps12_3'</i>       | (8)           | -    | gene overlap                                     | -                          | -     | -     | -     | -     | -     |                                                                                                                                                                                                                                  |
| <i>rps12_3'-rm16</i>       | 47            | 4.3  | trans-spliced<br>intron<br>excluded <sup>‡</sup> | 3/0/0                      | 1/0/0 | 1/0/0 | 1/0/0 | 1/1/0 | 2/0/0 | TTATAAGAAT TAAAAAATAAAATAAACTATAAATTTTATAAT                                                                                                                                                                                      |
| <i>rm16-rm23</i>           | 63            | 1.6  |                                                  | 1/0/0                      | 3/0/0 | 0/0/0 | 5/0/0 | 1/0/0 | 5/0/0 | TTTTTATTTTTTAAAAAATAAAT TATTAT TATATT TATATATATTA<br>TAT TAAAAATC                                                                                                                                                                |
| <i>rm23-rm4.5</i>          | 28            | 3.6  |                                                  | 2/0/0                      | 0/0/0 | 2/0/0 | 2/0/0 | 1/0/0 | 0/0/0 | TAAT TATAAAT TAAAAAGATTTTAATA                                                                                                                                                                                                    |
| <b><i>B. reflexa</i></b>   |               |      |                                                  |                            |       |       |       |       |       |                                                                                                                                                                                                                                  |
| <i>rm4.5-ycf1</i>          | 213           | 7.0  |                                                  | 8/0/0                      | 9/0/1 | 6/2/0 | 7/1/0 | 3/0/0 | 5/0/0 | TTGATAAATAGAAATATATTTTAAATTTTAAAAATATAAAAAATAC<br>ATTAATAAAT TACTAT TTTAAATTTAATGGTAAATATATAATATTTAT<br>TATATAAT TAAATAAAAAATAATAAT TAAAGTAAATATATAAAC<br>TTATAGTATGTTTAAATATAATAAATAAAAAAATAAATTTGGAGG<br>ATATAAAAAA            |
| <i>ycf1-rpl14</i>          | 52            | 0.0  |                                                  | 2/0/0                      | 0/0/0 | 5/0/0 | 2/0/0 | 0/0/0 | 4/0/0 | TATAATAAAAAAT TATTATTTAAATTTAATAT TTAATAT TATTTTAAAA<br>T                                                                                                                                                                        |
| <i>rpl14-rps2</i>          | 10            | 0.0  |                                                  | 0/0/0                      | 0/0/0 | 0/0/0 | 0/0/0 | 0/0/0 | 1/0/0 | AAATTTTATT                                                                                                                                                                                                                       |
| <i>rps2-trnE</i>           | 70            | 0.0  |                                                  | 4/0/0                      | 4/0/0 | 3/0/0 | 2/0/0 | 4/0/0 | 3/0/0 | TTATAATTTTAAAAAATAAATATTTTAAATTAATTAAT TAAAAATAA<br>ATATT TAAATTTTAAATAA                                                                                                                                                         |
| <i>trnE-rps14</i>          | 42            | 0.0  |                                                  | 1/0/0                      | 1/0/0 | 3/0/0 | 2/0/0 | 1/0/0 | 2/0/0 | TTTTTAAAAATATATATAATTTAATTAATTTTAAATATAT                                                                                                                                                                                         |
| <i>rps14-rps4</i>          | 16            | 6.3  |                                                  | 0/0/0                      | 1/0/0 | 0/0/0 | 0/0/0 | 0/0/0 | 0/0/0 | AAAAACAATAAT                                                                                                                                                                                                                     |
| <i>rps4-accD</i>           | 92            | 5.4  |                                                  | 4/0/0                      | 8/0/1 | 0/0/0 | 3/0/0 | 1/0/0 | 7/0/0 | TTAATATATTTATATAAATAAATTTAATTAATGAT TATCCCTTAATCTTA<br>TATATATAAATAATAATATATATAATATTAATAA                                                                                                                                        |
| <i>accD-rps18</i>          | (15)          | -    | gene overlap                                     | -                          | -     | -     | -     | -     | -     |                                                                                                                                                                                                                                  |
| <i>rps18-rps12_5'</i>      | 178           | 2.8  | trans-spliced<br>intron<br>excluded <sup>‡</sup> | 4/0/0                      | 5/0/0 | 4/0/0 | 4/0/0 | 7/0/1 | 9/0/0 | TATTTAATTTTTTATAAATTTATTTATATTTTAAATCCAATATAAAAAAT<br>ATTAATATATAAATAATATATTTTATTTGCTTTTATAATATTTTCATT<br>ATTTATT TAAATTTATAAAT TATATAATATATATATAATATAATTAAT<br>TATTTATTTTTTTTATTT                                               |
| <i>rps12-clpP</i>          | (7)           | -    | gene overlap                                     | -                          | -     | -     | -     | -     | -     |                                                                                                                                                                                                                                  |
| <i>clpP-rps11</i>          | 27            | 0.0  |                                                  | 0/0/0                      | 0/0/0 | 2/0/0 | 0/0/0 | 0/0/0 | 2/0/0 | AAAAATATATAAATTTTATTAATAT                                                                                                                                                                                                        |
| <i>rps11-rps3</i>          | 37            | 2.7  |                                                  | 2/0/0                      | 0/0/0 | 2/0/0 | 2/0/0 | 3/0/0 | 1/0/0 | TTATTATAATATAAATAAATAATTAATTTATTTGATATAT                                                                                                                                                                                         |
| <i>rps3-rps19</i>          | 6             | 0.0  |                                                  | 0/0/0                      | 0/0/0 | 0/0/0 | 0/0/0 | 0/0/0 | 0/0/0 | TATTTT                                                                                                                                                                                                                           |
| <i>rps19-rpl2</i>          | (4)           | -    | gene overlap                                     | -                          | -     | -     | -     | -     | -     |                                                                                                                                                                                                                                  |
| <i>rpl2-ycf2</i>           | 29            | 10.4 |                                                  | 1/0/0                      | 1/0/0 | 1/0/0 | 1/0/0 | 0/1/1 | 0/1/0 | ATAGATATGAATATATATTAATTTATTAG                                                                                                                                                                                                    |
| <i>ycf2-rps7</i>           | (12)          | -    | gene overlap                                     | -                          | -     | -     | -     | -     | -     |                                                                                                                                                                                                                                  |
| <i>rps7-rps12_3'</i>       | (8)           | -    | gene overlap                                     | -                          | -     | -     | -     | -     | -     |                                                                                                                                                                                                                                  |
| <i>rps12_3'-rm16</i>       | 53            | 1.9  | trans-spliced<br>intron<br>excluded <sup>‡</sup> | 2/0/0                      | 1/0/0 | 2/0/0 | 2/0/0 | 0/0/0 | 4/0/0 | TTATAAGAAAAATATATTATATAAATAATTAATTTATAAATTTTATTAA<br>T                                                                                                                                                                           |
| <i>rm16-rm23</i>           | 53            | 3.8  |                                                  | 1/0/0                      | 4/0/0 | 1/0/0 | 0/0/1 | 2/1/0 | 2/0/1 | TTAATAAATAAATAATTTATTTTAAAAATCATAAATAAAAAAATTTTCA<br>ATA                                                                                                                                                                         |
| <i>rm23-rm4.5</i>          | 18            | 11.1 |                                                  | 0/0/0                      | 1/0/0 | 1/0/0 | 1/0/0 | 0/0/0 | 1/0/0 | AAATTTAGGATTTTAATA                                                                                                                                                                                                               |

\*Numbers in parentheses are the lengths of gene overlaps.

<sup>†</sup>The values are the number of in-frame TAA/TAG/TGA codons in the sequence shown in the rightmost column.

<sup>‡</sup>The regions between *rps18* and the 5' exon of *rps12* and between *rm16* and the 3' exon of *rps12* contain the two portions of the *rps12* trans-spliced intron. We conservatively (14) assigned as intronic the 150 bp of sequence in these regions that aligns between the two *Balanophora* plastomes and which abuts the 5' and 3' exons of *rps12*. Owing to indels, the actual lengths of the regions assigned as intronic range from 150 to 180 bp.

**Table S5. GC content and codon usage for the 30 genomes analyzed in Fig. S5**

| Species*                            | Group                          | Genome        | No. of<br>codons <sup>‡</sup> | % GC content <sup>‡</sup> |                   |                     | No. of<br>unused<br>codons <sup>‡</sup> |
|-------------------------------------|--------------------------------|---------------|-------------------------------|---------------------------|-------------------|---------------------|-----------------------------------------|
|                                     |                                |               |                               | Genome <sup>†</sup>       | Protein<br>coding | 3rd pos.<br>synony. |                                         |
| <i>Balanophora laxiflora</i>        | Angiosperm - holoparasite      | Plastid       | 3287                          | 12.2                      | 8.9               | 1.1                 | 21                                      |
| <i>Balanophora reflexa</i>          | Angiosperm - holoparasite      | Plastid       | 3190                          | 11.6                      | 8.7               | 1.2                 | 20                                      |
| <i>Plasmodium falciparum</i>        | Apicomplexan - parasite        | Plastid       | 7418                          | 13.1                      | 11.0              | 2.1                 | 11                                      |
| <i>Zinderia insectifolia</i>        | Proteobacterium                | Bacterial     | 62769                         | 13.5                      | 13.2              | 2.1                 | 1                                       |
| <i>Babesia microti</i>              | Apicomplexan - parasite        | Plastid       | 6976                          | 14.1                      | 12.1              | 2.3                 | 7                                       |
| <i>Carsonella ruddii</i>            | Proteobacterium                | Bacterial     | 51205                         | 14.0                      | 13.3              | 2.6                 | 2                                       |
| <i>Eimeria tenella</i>              | Apicomplexan - parasite        | Plastid       | 6891                          | 18.6                      | 15.4              | 2.8                 | 1                                       |
| <i>Toxoplasma gondii</i>            | Apicomplexan - parasite        | Plastid       | 6158                          | 19.3                      | 16.4              | 3.9                 | 3                                       |
| <i>Diadegma semiclausum</i>         | Animal - insect - parasite     | Mitochondrial | 3709                          | 12.6                      | 16.3              | 4.4                 | 4                                       |
| <i>Nasuia deltocephalinicola</i>    | Proteobacterium                | Bacterial     | 43435                         | 15.2                      | 14.3              | 4.4                 | 1                                       |
| <i>Monosiga brevicollis</i>         | Choanoflagellate               | Mitochondrial | 8323                          | 14.0                      | 22.1              | 4.9                 | 4                                       |
| <i>Nitzschia spp.</i>               | Diatom - nonphotosynthetic     | Plastid       | 15673                         | 21.9                      | 20.4              | 5.3                 | 0                                       |
| <i>Ichthyophthirius multifiliis</i> | Ciliate - parasite             | Mitochondrial | 12119                         | 16.4                      | 15.5              | 5.7                 | 0                                       |
| <i>Acrasis kona</i>                 | Excavate                       | Mitochondrial | 14149                         | 16.8                      | 16.0              | 5.9                 | 3                                       |
| <i>Choreocolax polysiphoniae</i>    | Red alga - parasite            | Plastid       | 19129                         | 20.5                      | 22.7              | 5.9                 | 1                                       |
| <i>Rozella allomycis</i>            | Fungus - Cryptomycota          | Mitochondrial | 1926                          | 14.5                      | 15.1              | 6.0                 | 11                                      |
| <i>Radopholus similis</i>           | Animal - nematode              | Mitochondrial | 3376                          | 14.6                      | 15.3              | 6.8                 | 10                                      |
| <i>Saccharomyces cerevisiae</i>     | Fungus - yeast                 | Mitochondrial | 2218                          | 14.1                      | 24.5              | 7.9                 | 11                                      |
| <i>Euglena longa</i>                | Euglenid - nonphotosynthetic   | Plastid       | 10707                         | 20.2                      | 21.7              | 9.0                 | 0                                       |
| <i>Nakaseomyces bacillisporus</i>   | Fungus - yeast                 | Mitochondrial | 2193                          | 10.9                      | 23.8              | 9.2                 | 19                                      |
| <i>Helicosporidium sp.</i>          | Green alga - parasite          | Plastid       | 9724                          | 26.9                      | 25.0              | 10.3                | 0                                       |
| <i>Hydnora visseri</i>              | Angiosperm - holoparasite      | Plastid       | 5708                          | 23.7                      | 20.4              | 10.8                | 1                                       |
| <i>Pilostyles hamiltonii</i>        | Angiosperm - holoparasite      | Plastid       | 995                           | 22.7                      | 23.2              | 12.9                | 6                                       |
| <i>Cytinus hypocistis</i>           | Angiosperm - holoparasite      | Plastid       | 2230                          | 29.9                      | 29.7              | 13.1                | 3                                       |
| <i>Bulboplastis apyrenoidosa</i>    | Red alga - photosynthetic      | Plastid       | 41592                         | 23.3                      | 29.9              | 13.0                | 0                                       |
| <i>Pilostyles aethiopica</i>        | Angiosperm - holoparasite      | Plastid       | 926                           | 24.2                      | 24.6              | 14.7                | 8                                       |
| <i>Cynomorium coccineum</i>         | Angiosperm - holoparasite      | Plastid       | 5515                          | 29.9                      | 26.0              | 14.7                | 1                                       |
| <i>Monotropa uniflora</i>           | Angiosperm - mycoheterotroph   | Plastid       | 5123                          | 28.0                      | 27.9              | 15.3                | 0                                       |
| <i>Thismia tentaculata</i>          | Angiosperm - mycoheterotroph   | Plastid       | 1027                          | 26.6                      | 26.2              | 16.8                | 1                                       |
| <i>Polytoma uvella</i>              | Green alga - nonphotosynthetic | Plastid       | 13501                         | 23.5                      | 39.2              | 35.5                | 0                                       |

\*See Table S12 for strain number, accession number, and other information.

<sup>†</sup>The "genome" GC values include only one copy of the large, usually perfect repeats present in many plastomes, as these almost always contain rRNA genes, whose relatively GC richness will bias the full-genome GC values, especially for highly reduced genomes.

<sup>‡</sup>Protein gene duplicates were removed in the calculations for these three sets of values.

**Table S6. Plastid codon usage in *Balanophora* and *Nicotiana***

| Amino acid | Codon            | Number of codons* |                |                | Percent codon usage* |                |                | Relative synonymous codon usage (RSCU)* |                |                |
|------------|------------------|-------------------|----------------|----------------|----------------------|----------------|----------------|-----------------------------------------|----------------|----------------|
|            |                  | <i>Nicot.</i>     | <i>B. lax.</i> | <i>B. ref.</i> | <i>Nicot.</i>        | <i>B. lax.</i> | <i>B. ref.</i> | <i>Nicot.</i>                           | <i>B. lax.</i> | <i>B. ref.</i> |
| Phe        | TTT              | 994               | 275            | 255            | 3.57                 | 8.37           | 7.99           | 1.27                                    | 1.99           | 2.00           |
|            | TTC              | 575               | 1              | 0              | 2.07                 | 0.03           | 0.00           | 0.73                                    | 0.01           | 0.00           |
| Leu        | TTA              | 904               | 304            | 289            | 3.25                 | 9.25           | 9.06           | 1.83                                    | 5.77           | 5.80           |
|            | TTG              | 605               | 2              | 1              | 2.17                 | 0.06           | 0.03           | 1.22                                    | 0.04           | 0.02           |
|            | CTT              | 644               | 7              | 7              | 2.31                 | 0.21           | 0.22           | 1.30                                    | 0.13           | 0.14           |
|            | CTC              | 231               | 0              | 0              | 0.83                 | 0.00           | 0.00           | 0.47                                    | 0.00           | 0.00           |
|            | CTA              | 397               | 3              | 2              | 1.43                 | 0.09           | 0.06           | 0.80                                    | 0.06           | 0.04           |
| Ile        | CTG              | 189               | 0              | 0              | 0.68                 | 0.00           | 0.00           | 0.38                                    | 0.00           | 0.00           |
|            | ATT              | 1119              | 288            | 284            | 4.02                 | 8.76           | 8.90           | 1.44                                    | 1.33           | 1.30           |
| Met        | ATC              | 479               | 0              | 1              | 1.72                 | 0.00           | 0.03           | 0.62                                    | 0.00           | 0.00           |
|            | ATA              | 727               | 363            | 368            | 2.61                 | 11.04          | 11.54          | 0.94                                    | 1.67           | 1.69           |
| Val        | ATG              | 665               | 33             | 29             | 2.39                 | 1.00           | 0.91           | 1.00                                    | 1.00           | 1.00           |
| Ser        | GTT              | 543               | 8              | 13             | 1.95                 | 0.24           | 0.41           | 1.43                                    | 1.19           | 1.73           |
|            | GTC              | 199               | 1              | 0              | 0.72                 | 0.03           | 0.00           | 0.52                                    | 0.15           | 0.00           |
|            | GTA              | 569               | 18             | 17             | 2.04                 | 0.55           | 0.53           | 1.49                                    | 2.67           | 2.27           |
| Pro        | GTG              | 213               | 0              | 0              | 0.77                 | 0.00           | 0.00           | 0.56                                    | 0.00           | 0.00           |
|            | TCT              | 630               | 41             | 41             | 2.26                 | 1.25           | 1.29           | 1.73                                    | 2.08           | 2.28           |
|            | TCC              | 351               | 0              | 0              | 1.26                 | 0.00           | 0.00           | 0.96                                    | 0.00           | 0.00           |
|            | TCA              | 429               | 48             | 49             | 1.54                 | 1.46           | 1.54           | 1.18                                    | 2.44           | 2.72           |
|            | TCG              | 223               | 0              | 0              | 0.80                 | 0.00           | 0.00           | 0.61                                    | 0.00           | 0.00           |
| Thr        | AGT              | 424               | 29             | 18             | 1.52                 | 0.88           | 0.56           | 1.17                                    | 1.47           | 1.00           |
|            | AGC              | 126               | 0              | 0              | 0.45                 | 0.00           | 0.00           | 0.35                                    | 0.00           | 0.00           |
|            | CCT              | 448               | 26             | 27             | 1.61                 | 0.79           | 0.85           | 1.52                                    | 2.26           | 2.51           |
|            | CCC              | 223               | 1              | 0              | 0.80                 | 0.03           | 0.00           | 0.76                                    | 0.09           | 0.00           |
| Ala        | CCA              | 345               | 19             | 16             | 1.24                 | 0.58           | 0.50           | 1.17                                    | 1.65           | 1.49           |
|            | CCG              | 161               | 0              | 0              | 0.58                 | 0.00           | 0.00           | 0.55                                    | 0.00           | 0.00           |
|            | ACT              | 547               | 23             | 21             | 1.97                 | 0.70           | 0.66           | 1.56                                    | 1.77           | 1.87           |
|            | ACC              | 269               | 0              | 0              | 0.97                 | 0.00           | 0.00           | 0.77                                    | 0.00           | 0.00           |
| Tyr        | ACA              | 433               | 29             | 24             | 1.56                 | 0.88           | 0.75           | 1.23                                    | 2.23           | 2.13           |
|            | ACG              | 154               | 0              | 0              | 0.55                 | 0.00           | 0.00           | 0.44                                    | 0.00           | 0.00           |
|            | GCT              | 632               | 17             | 13             | 2.27                 | 0.52           | 0.41           | 1.77                                    | 2.34           | 1.86           |
|            | GCC              | 252               | 0              | 0              | 0.91                 | 0.00           | 0.00           | 0.71                                    | 0.00           | 0.00           |
| TER        | GCA              | 404               | 12             | 15             | 1.45                 | 0.37           | 0.47           | 1.13                                    | 1.66           | 2.14           |
|            | GCG              | 141               | 0              | 0              | 0.51                 | 0.00           | 0.00           | 0.39                                    | 0.00           | 0.00           |
| Trp        | TAT              | 791               | 304            | 321            | 2.84                 | 9.25           | 10.06          | 1.60                                    | 1.97           | 1.97           |
|            | TAC              | 199               | 5              | 5              | 0.72                 | 0.15           | 0.16           | 0.40                                    | 0.03           | 0.03           |
| His        | TAA              | 51                | 14             | 14             | 0.18                 | 0.43           | 0.44           | 1.56                                    | 1.87           | 1.87           |
|            | TGA              | 23                | 1              | 1              | 0.08                 | 0.03           | 0.03           | 0.70                                    | 0.13           | 0.13           |
| Gln        | TAG <sup>†</sup> | 24                | 18             | 16             | 0.09                 | 0.55           | 0.50           | 0.73                                    | 2.00           | 2.00           |
|            | TGG              | 496               | 0              | 0              | 1.78                 | 0.00           | 0.00           | 1.00                                    | 0.00           | 0.00           |
| Asn        | CAT              | 507               | 21             | 22             | 1.82                 | 0.64           | 0.69           | 1.55                                    | 2.00           | 2.00           |
|            | CAC              | 149               | 0              | 0              | 0.54                 | 0.00           | 0.00           | 0.45                                    | 0.00           | 0.00           |
| Lys        | CAA              | 735               | 44             | 42             | 2.64                 | 1.34           | 1.32           | 1.49                                    | 2.00           | 1.95           |
|            | CAG              | 249               | 0              | 1              | 0.89                 | 0.00           | 0.03           | 0.51                                    | 0.00           | 0.05           |
| Asp        | AAT              | 1052              | 488            | 447            | 3.78                 | 14.85          | 14.01          | 1.53                                    | 1.99           | 1.99           |
|            | AAC              | 327               | 3              | 2              | 1.18                 | 0.09           | 0.06           | 0.47                                    | 0.01           | 0.01           |
| Glu        | AAA              | 1106              | 568            | 567            | 3.97                 | 17.28          | 17.77          | 1.48                                    | 1.98           | 1.99           |
|            | AAG              | 389               | 6              | 4              | 1.40                 | 0.18           | 0.13           | 0.52                                    | 0.02           | 0.01           |
| Cys        | GAT              | 903               | 40             | 36             | 3.25                 | 1.22           | 1.13           | 1.60                                    | 2.00           | 1.95           |
|            | GAC              | 226               | 0              | 1              | 0.81                 | 0.00           | 0.03           | 0.40                                    | 0.00           | 0.05           |
| Arg        | GAA              | 1081              | 67             | 62             | 3.88                 | 2.04           | 1.94           | 1.48                                    | 2.00           | 1.97           |
|            | GAG              | 380               | 0              | 1              | 1.37                 | 0.00           | 0.03           | 0.52                                    | 0.00           | 0.03           |
| Gly        | TGT              | 234               | 23             | 22             | 0.84                 | 0.70           | 0.69           | 1.46                                    | 2.00           | 1.91           |
|            | TGC              | 86                | 0              | 1              | 0.31                 | 0.00           | 0.03           | 0.54                                    | 0.00           | 0.09           |
|            | CGT              | 345               | 15             | 15             | 1.24                 | 0.46           | 0.47           | 1.22                                    | 2.20           | 2.09           |
|            | CGC              | 106               | 1              | 0              | 0.38                 | 0.03           | 0.00           | 0.38                                    | 0.15           | 0.00           |
|            | CGA              | 409               | 1              | 1              | 1.47                 | 0.03           | 0.03           | 1.45                                    | 0.15           | 0.14           |
| Gly        | CGG              | 130               | 0              | 0              | 0.47                 | 0.00           | 0.00           | 0.46                                    | 0.00           | 0.00           |
|            | AGA              | 513               | 24             | 27             | 1.84                 | 0.73           | 0.85           | 1.82                                    | 3.51           | 3.77           |
|            | AGG              | 192               | 0              | 0              | 0.69                 | 0.00           | 0.00           | 0.68                                    | 0.00           | 0.00           |
| Gly        | GGT              | 587               | 40             | 41             | 2.11                 | 1.22           | 1.29           | 1.25                                    | 1.67           | 1.78           |
|            | GGC              | 211               | 0              | 0              | 0.76                 | 0.00           | 0.00           | 0.45                                    | 0.00           | 0.00           |
|            | GGA              | 752               | 55             | 50             | 2.70                 | 1.67           | 1.57           | 1.60                                    | 2.29           | 2.17           |
|            | GGG              | 328               | 1              | 1              | 1.18                 | 0.03           | 0.03           | 0.70                                    | 0.04           | 0.04           |

\*Red indicates values of zero.

<sup>†</sup>TAG is used as Trp in *Balanophora* plastomes.

**Table S7. Nitrogen usage and energy cost as a function of amino acid frequency in the *B. laxiflora* and *Nicotiana* plastomes**

| Amino acid | Nitrogen atoms* | Energy cost† | % frequency‡        |                  |
|------------|-----------------|--------------|---------------------|------------------|
|            |                 |              | <i>B. laxiflora</i> | <i>Nicotiana</i> |
| Phe        | 1               | 52.0         | <b>8.4</b>          | 5.6              |
| Leu        | 1               | 27.3         | 9.7                 | 10.7             |
| Ile        | 1               | 32.3         | <b>19.9</b>         | 8.4              |
| Met        | 1               | 34.3         | 1.0                 | 2.4              |
| Val        | 1               | 23.3         | 0.8                 | 5.5              |
| Ser        | 1               | 11.7         | 3.6                 | 7.8              |
| Pro        | 1               | 20.3         | 1.4                 | 4.2              |
| Thr        | 1               | 18.7         | 1.6                 | 5.0              |
| Ala        | 1               | 11.7         | 0.9                 | 5.1              |
| Tyr        | 1               | 50.0         | <b>9.4</b>          | 3.6              |
| His        | 3               | 38.3         | 0.6                 | 2.4              |
| Gln        | 2               | 16.3         | 1.3                 | 3.5              |
| Asn        | 2               | 14.7         | <b>15.0</b>         | 5.0              |
| Lys        | 2               | 30.3         | <b>17.5</b>         | 5.4              |
| Asp        | 1               | 12.7         | 1.2                 | 4.1              |
| Glu        | 1               | 15.3         | 2.0                 | 5.3              |
| Cys        | 1               | 24.7         | 0.7                 | 1.2              |
| Trp        | 2               | 74.3         | 0.6                 | 1.8              |
| Arg        | 4               | 27.3         | 1.3                 | 6.1              |
| Gly        | 1               | 11.7         | 2.9                 | 6.7              |
| N index§   |                 |              | 1.4                 | 1.4              |
| E index¶   |                 |              | 29.5                | 25.0             |

\*Number of nitrogen atoms present in each amino acid.

†The energetic cost of synthesizing each amino acid, which ranges from 12 to 74 high-energy phosphate bonds (15).

‡Boldface indicates amino acids used at a higher frequency in *B. laxiflora* than in *Nicotiana*.

§The N index is the sum of the products of the number of nitrogen atoms in each amino acid and the % frequency of that amino acid.

¶The E index is the sum of the products of the energy cost of each amino acid and the % frequency of that amino acid.

**Table S8. Stop and Trp codons in the 16 annotated and putatively functional protein genes in the *Cytinus* plastome.**

| Gene         | Stop codon | # Trp codons |            |
|--------------|------------|--------------|------------|
|              |            | Total        | Conserved* |
| <i>clpP</i>  | TAA        | 2            | 2          |
| <i>rpl2</i>  | TAA        | 2            | 2          |
| <i>rpl14</i> | TAA        | 0            | 0          |
| <i>rpl16</i> | TAA        | 3            | 3          |
| <i>rpl20</i> | TAA        | 1            | 1          |
| <i>rpl22</i> | TAA        | 0            | 0          |
| <i>rpl36</i> | TAA        | 0            | 0          |
| <i>rps2</i>  | TAA        | 4            | 4          |
| <i>rps3</i>  | TAA        | 3            | 3          |
| <i>rps4</i>  | TAA        | 0            | 0          |
| <i>rps7</i>  | TAA        | 1            | 1          |
| <i>rps8</i>  | TAA        | 1            | 1          |
| <i>rps11</i> | TAA        | 2            | 1          |
| <i>rps12</i> | TAA        | 0            | 0          |
| <i>rps14</i> | TAA        | 2            | 2          |
| <i>rps19</i> | TAA        | 1            | 1          |

\*Trp residues in *Cytinus* that are located at sites at which Trp is present in most or all of the diverse land plants in the amino-acid alignments on which this table is based.

**Table S9. Features of highly compact plastomes\***

| Taxon                               | Group           | Lifestyle       | Intergenic spacer (%) | Overlapping protein genes <sup>†</sup> |              | Shrunk proteins | No. of cis-spliced introns | %GC  |
|-------------------------------------|-----------------|-----------------|-----------------------|----------------------------------------|--------------|-----------------|----------------------------|------|
|                                     |                 |                 |                       | % overlap <sup>‡</sup>                 | No. of genes |                 |                            |      |
| <i>Balanophora laxiflora</i>        | angiosperms     | parasite        | 4.8                   | 53.3                                   | 15           | yes             | 0                          | 12.2 |
| <i>Helicosporidium sp.</i>          | green algae     | parasite        | 4.8                   | 34.7                                   | 23           | ?               | 1                          | 26.9 |
| <i>Balanophora reflexa</i>          | angiosperms     | parasite        | 5.8                   | 66.7                                   | 15           | yes             | 0                          | 11.6 |
| <i>Cyanidioschyzon merolae</i>      | red algae       | photosynthetic  | 5.9                   | 40.0                                   | 197          | ?               | 0                          | 37.6 |
| <i>Babesia microti</i> <sup>§</sup> | apicomplexans   | parasite        | 6.2                   | 30.0                                   | 30           | ?               | 0                          | 14.1 |
| <i>Prototheca zopfii</i>            | green algae     | parasite        | 6.6                   | 10.5                                   | 19           | ?               | 0                          | 27.0 |
| <i>Cynomorium coccineum</i>         | angiosperms     | parasite        | 7.2                   | 22.2                                   | 18           | ?               | 4                          | 29.9 |
| <i>Sciaphila thaidanica</i>         | angiosperms     | mycoheterotroph | 8.1                   | 78.6                                   | 14           | ?               | 2                          | 30.5 |
| <i>Hydnora visseri</i>              | angiosperms     | parasite        | 11.6                  | 23.5                                   | 17           | yes             | 2                          | 23.7 |
| <i>Dictyopteris divaricata</i>      | brown algae     | photosynthetic  | 13.1                  | 11.6                                   | 138          | ?               | 0                          | 30.7 |
| <i>Lepidodinium chlorophorum</i>    | dinoflagellates | photosynthetic  | 13.3                  | 34.9                                   | 63           | ?               | 3                          | 34.6 |

\*Plastomes were included if they have  $\geq 10\%$  overlapping protein genes and/or  $\leq 10\%$  intergenic spacer DNA.

<sup>†</sup>We followed the standard practice for bacterial genomes and included only protein genes in the overlap analyses (overlaps with rRNA and tRNA genes are extremely rare).

<sup>‡</sup>The percentage of all protein genes that overlap at one or both ends with another protein gene.

<sup>§</sup>*Babesia* was selected to represent the many apicomplexan plastomes that meet our inclusion criteria. All other plastomes that meet these criteria are included in the table.

**Table S10. PCR primers used in this study**

| Name                                                                               | Sequence                       |
|------------------------------------------------------------------------------------|--------------------------------|
| <b>A . Primers for <i>B. laxiflora</i> plastome validation and RT-PCR analysis</b> |                                |
| Blax accD 1F*                                                                      | ATGAATATTTGTGAACAATGTG         |
| Blax accD 1R*                                                                      | AAAAGCTATATATGTATTTGGTTC       |
| Blax accD 2F                                                                       | ATGTTTATAAAAAAATAGTATTTAAATTAT |
| Blax accD 2R                                                                       | CTTGGTACAATAATATCAAATATTC      |
| Blax clpP 1F                                                                       | TCTTCAGCTTCAAGTATAAATTC        |
| Blax clpP 1R*                                                                      | ATGCAATATATAAACCTAATATACG      |
| Blax clpP 2F*                                                                      | CAATTATACCATAATTTTTAGCTTC      |
| Blax clpP 2R                                                                       | ATGCCCATAGGTATTCCT             |
| Blax rpl14 1F*                                                                     | ATATTTTAATATAACTGATAATACAGG    |
| Blax rpl14 1R                                                                      | TTTTTACTTTTTGGATTATTTTC        |
| Blax rpl2 1F                                                                       | TTATAACCCTAAAAAGTAGATGG        |
| Blax rpl2 1R                                                                       | ATTAGTAAAATCAGCAGGATG          |
| Blax rps11 1F                                                                      | AAAATATCTCTACCAAATTTAATC       |
| Blax rps11 1R*                                                                     | GAAGTTATTTATTTTCTTCTTG         |
| Blax rps12-5' 1F                                                                   | GTCCTCAAAGAAAAGGAATTTG         |
| Blax rps12-3' 1R                                                                   | ACCAAATCTGCTTTACG              |
| Blax rps12-3' 2R*                                                                  | CTCCATTTGTATCTAAAACACCTC       |
| Blax rps3 1F                                                                       | TTAATACTTTTTAATGGAATTTTAC      |
| Blax rps3 1R                                                                       | ATGATAAATAAAAATAATCCAAT        |
| Blax rps4 1F                                                                       | TAATGGATAATAAATAAATATTTTGG     |
| Blax rps4 1R*                                                                      | ATTTCACAATTCCTGCATC            |
| Blax rrn16 1F*                                                                     | TCAGGATTAACGCTTGTG             |
| Blax rrn16 1R*                                                                     | TTATATTCACCACAGTATATCTTACC     |
| Blax rrn23 1F                                                                      | AATATATAACATAAATCTAAAAATTTCC   |
| Blax rrn23 1R                                                                      | TTTTTACCTATTATCTATCAATTATTC    |
| Blax rrn23 2F                                                                      | AAAGTAAAAATATAAAAAAATAGGAAG    |
| Blax rrn23 2R                                                                      | AATAATTTTATTACTTAATATCTTTTCCAG |
| Blax ycf1 1F*                                                                      | GTATTATTTTGGTTATTTTTTTAG       |
| Blax ycf1 1R*                                                                      | TATCTTTATATTTTCTTGAACG         |
| Blax ycf1 2R                                                                       | TAATATTTAATTTTTATACCTTCC       |
| <b>B. Primers for <i>B. reflexa</i> plastome validation</b>                        |                                |
| Bref ycf1 F1                                                                       | TTTTGGAAAAA ATATATACCTAATTT T  |
| Bref ycf1 F2                                                                       | GAACAA CAA GAA AAT GAG GAA     |
| Bref ycf1 R1                                                                       | AAAATTAGGTA ATATATTTTCCAAA A   |
| Bref ycf1 R2                                                                       | TATATCATGATCAAAATCTGATTG       |
| Bref rpl14 F1                                                                      | TATTTTAATATAATTGATAATACAGGGA   |
| Bref rpl14 R1                                                                      | AATAATTGCAGTATTTTACTATATTT     |
| Bref rps4 F1                                                                       | TAATGGATAATAAATAAATAATTTGAA    |
| Bref rps4 R1                                                                       | TATTTCAACAATTTCTGCATCT         |
| Bref rps18intron R1                                                                | GAAAATATTATAAAAGCAAATAAAATAT   |
| Bref accD F1                                                                       | GTGAACCAAATACATATATAGCATT      |
| Bref clpP R1                                                                       | GAATTTTTATTAGAAGCTGAAGA        |
| Bref rps11 F1                                                                      | AACTTCTCCTATTAAATTAGTAAC       |
| Bref rpl2 F1                                                                       | CTATTTGGATCATATTCTATTGC        |
| Bref rpl2 R1                                                                       | TTACAAAAAAGGTAAAAATTCAT        |
| Bref rpl2 F2                                                                       | ATTTTTATGACCTATATTTCTATATTTA   |
| Bref rps19 R1                                                                      | TGGAGGAGGTAAAGGAAA             |
| Bref rrn16 F1                                                                      | TTACTTTTCCACCTCTAACTAAAAC      |
| Bref rrn16 F2                                                                      | CGGATAATCAACCACACTGAGA         |
| Bref rrn16 R1                                                                      | TCATATCATAAGAGGTGTTTTAGA       |
| Bref rrn16 R2                                                                      | TCTCAGTGTGGTTGATTATCCG         |
| Bref rrn23 1F1                                                                     | GTCAAGTCATTATGCTCTTT           |
| Bref rrn23 F2                                                                      | AACATAAAATTAATAAATCCCGAA       |
| Bref rrn23 F3                                                                      | AGTCAAGACTTAAGATTTATTCAA       |
| Bref rrn23 1R1                                                                     | CGATTTATCTACCTGTATTGG          |
| Bref rrn23 R2                                                                      | AATTTAGATTTTTTAGTATATATTAGCT   |

\* Primers also used for *B. reflexa* plastome validation



**Table S11. PCR primer pairs and temperatures used for *Balanophora* plastome validation and RT-PCR analysis of *B. laxiflora***

| Forward Primer                                                | Reverse Primer      | PCR temperatures<br>(melt, anneal, extend) |
|---------------------------------------------------------------|---------------------|--------------------------------------------|
| <b>A. Primers for <i>B. laxiflora</i> plastome validation</b> |                     |                                            |
| Blax accD 1F                                                  | Blax rps11 1R       | 95.0, 49.0, 63.0                           |
| Blax accD 1F                                                  | Blax rps12-3' 1R    | 95.0, 49.0, 63.0                           |
| Blax accD 1F                                                  | Blax rps3 1R        | 95.0, 49.0, 63.0                           |
| Blax rpl14 1F                                                 | Blax accD 1R        | 95.0, 49.0, 63.0                           |
| Blax rpl2 1F                                                  | Blax rps12-3' 1R    | 95.0, 49.0, 63.0                           |
| Blax rpl2 1F                                                  | Blax rrn16 1R       | 95.0, 49.0, 63.0                           |
| Blax rpl2 1F                                                  | Blax rrn23 1R       | 95.0, 49.0, 63.0                           |
| Blax rpl2 1F                                                  | Blax rrn23 2R       | 95.0, 49.0, 63.0                           |
| Blax rps11 1F                                                 | Blax rpl2 1R        | 95.0, 49.0, 63.0                           |
| Blax rrn16 1F                                                 | Blax rrn23 1R       | 95.0, 49.0, 63.0                           |
| Blax rrn23 1F                                                 | Blax ycf1 1R        | 95.0, 49.0, 63.0                           |
| Blax rrn23 2F                                                 | Blax rpl14 1R       | 95.0, 49.0, 63.0                           |
| Blax rrn23 2F                                                 | Blax ycf1 1R        | 95.0, 49.0, 63.0                           |
| <b>B. Primers for <i>B. reflexa</i> plastome validation</b>   |                     |                                            |
| Blax accD1F                                                   | Blax clpP 1R        | 95.0, 49.0, 63.0                           |
| Blax clpP 2F                                                  | Blax rps11 1R       | 95.0, 49.0, 63.0                           |
| Blax rpl14 1F                                                 | Blax rps4 1R        | 95.0, 49.0, 63.0                           |
| Blax rrn16 1F                                                 | Blax rrn16 R        | 95.0, 49.0, 63.0                           |
| Blax ycf1 1F                                                  | Blax ycf1 1R        | 95.0, 49.0, 63.0                           |
| Bref accD F1                                                  | Bref rps18intron R1 | 95.0, 47.5, 63.0                           |
| Bref accD F1                                                  | Bref clpP R1        | 95.0, 47.5, 63.0                           |
| Bref rpl14F1                                                  | Bref rps4 R1        | 95.0, 47.5, 63.0                           |
| Bref rpl2 F1                                                  | Bref rpl2 R1        | 95.0, 47.5, 63.0                           |
| Bref rpl2 F2                                                  | Blax rps12-3' 2R    | 95.0, 47.5, 63.0                           |
| Bref rpl2 F2                                                  | Bref rrn16 R1       | 95.0, 47.0, 63.0                           |
| Bref rps11 F1                                                 | Bref rps19R1        | 95.0, 47.5, 63.0                           |
| Bref rps4 F1                                                  | Blax accD 1R        | 95.0, 47.5, 63.0                           |
| Bref rrn16 F1                                                 | Bref rrn16 R2       | 95.0, 47.0, 63.0                           |
| Bref rrn16 F2                                                 | Blax rrn16 R1       | 95.0, 48.0, 63.0                           |
| Bref rrn23 1F1                                                | Bref rrn23 1R1      | 95.0, 47.5, 63.0                           |
| Bref rrn23 2F1                                                | Blax ycf1 R1        | 95.0, 47.5, 63.0                           |
| Bref rrn23 F2                                                 | Bref rrn23 1R1      | 95.0, 47.0, 63.0                           |
| Bref rrn23 F3                                                 | Bref rrn23 R2       | 95.0, 47.0, 63.0                           |
| Bref ycf1 F1                                                  | Bref ycf1 R2        | 95.0, 47.0, 63.0                           |
| Bref ycf1 F2                                                  | Bref rpl14 R1       | 95.0, 47.5, 63.0                           |
| <b>C. RT-PCR amplification of <i>B. laxiflora</i></b>         |                     |                                            |
| Blax accD 1F                                                  | Blax accD 1R        | 95.0, 49.0, 72.0                           |
| Blax accD 2F                                                  | Blax accD 2R        | 95.0, 49.0, 63.0                           |
| Blax clpP 1F                                                  | Blax clpP 1R        | 95.0, 49.0, 72.0                           |
| Blax clpP 2F                                                  | Blax clpP 2R        | 95.0, 49.0, 63.0                           |
| Blax rpl14 1F                                                 | Blax rpl14 1R       | 95.0, 49.0, 72.0                           |
| Blax rpl2 1F                                                  | Blax rpl2 1R        | 95.0, 49.0, 72.0                           |
| Blax rps11 1F                                                 | Blax rps11 1R       | 95.0, 49.0, 72.0                           |
| Blax rps12-5' 1F                                              | Blax rps12-3' 2R    | 95.0, 49.0, 63.0                           |
| Blax rps3 1F                                                  | Blax rps3 1R        | 95.0, 49.0, 63.0                           |
| Blax rps4 1F                                                  | Blax rps4 1R        | 95.0, 49.0, 72.0                           |
| Blax rrn16 1F                                                 | Blax rrn16 1R       | 95.0, 49.0, 63.0                           |
| Blax rrn23 1F                                                 | Blax rrn23 1R       | 95.0, 49.0, 63.0                           |
| Blax rrn23 2F                                                 | Blax rrn23 2R       | 95.0, 49.0, 63.0                           |
| Blax ycf1 1F                                                  | Blax ycf1 1R        | 95.0, 49.0, 63.0                           |
| Blax ycf1 1F                                                  | Blax ycf1 2R        | 95.0, 49.0, 63.0                           |

**Table S12. Genomes used in this study**

| Genome        | Group                          | Taxon                                            | Accession         | Analysis* |   |   |   |   |     |
|---------------|--------------------------------|--------------------------------------------------|-------------------|-----------|---|---|---|---|-----|
| Plastid       | Angiosperm - autotroph         | <i>Amborella trichopoda</i>                      | NC_005086.1       | P         |   |   |   | A |     |
| Plastid       | Angiosperm - autotroph         | <i>Arabidopsis thaliana</i>                      | NC_000932.1       | P         |   |   |   | A |     |
| Plastid       | Angiosperm - autotroph         | <i>Carica papaya</i>                             | NC_010323.1       | P         |   |   |   | A |     |
| Plastid       | Angiosperm - autotroph         | <i>Magnolia denudata</i>                         | NC_018357.1       | P         |   |   |   | A |     |
| Plastid       | Angiosperm - autotroph         | <i>Nicotiana tabacum</i>                         | NC_001879.2       | P         | C |   |   | A |     |
| Plastid       | Angiosperm - autotroph         | <i>Nymphaea alba</i>                             | AJ627251.1        | P         |   |   |   | A |     |
| Plastid       | Angiosperm - autotroph         | <i>Oryza sativa</i> Japonica                     | NC_001320.1       | P         |   |   |   | A |     |
| Plastid       | Angiosperm - autotroph         | <i>Solanum lycopersicum</i>                      | NC_007898.3       | P         |   |   |   | A |     |
| Plastid       | Angiosperm - autotroph         | <i>Vitis vinifera</i>                            | DQ424856.1        | P         |   |   |   | A |     |
| Plastid       | Angiosperm - hemiparasite      | <i>Olax imbricata</i>                            | KX816863          | P         |   |   |   | A |     |
| Plastid       | Angiosperm - hemiparasite      | <i>Osyris alba</i>                               | NC_027960.1       |           |   |   |   |   | G   |
| Plastid       | Angiosperm - hemiparasite      | <i>Schoepfia jasminodora</i>                     | KX775962          | P         |   |   |   | A | G   |
| Plastid       | Angiosperm - hemiparasite      | <i>Viscum album</i>                              | NC_028012         |           |   |   |   |   | G   |
| Plastid       | Angiosperm - hemiparasite      | <i>Ximenia americana</i>                         | GQ997860-GQ997931 | P         |   |   |   | A |     |
| Plastid       | Angiosperm - holoparasite      | <i>Balanophora laxiflora</i>                     | KX784265          | P         | C | B | A | G | H   |
| Plastid       | Angiosperm - holoparasite      | <i>Balanophora reflexa</i>                       | KX784266          | P         |   | B | A | G | H   |
| Plastid       | Angiosperm - holoparasite      | <i>Conopholis americana</i>                      | NC_023131.1       |           |   |   |   |   | G   |
| Plastid       | Angiosperm - holoparasite      | <i>Cuscuta gronovii</i>                          | NC_009765.1       |           |   |   |   |   | G   |
| Plastid       | Angiosperm - holoparasite      | <i>Cuscuta obtusiflora</i>                       | NC_009949.1       |           |   |   |   |   | G   |
| Plastid       | Angiosperm - holoparasite      | <i>Cynomorium coccineum</i>                      | KX270752          |           |   |   | B |   | G H |
| Plastid       | Angiosperm - holoparasite      | <i>Cytinus hypocistis</i>                        | KT335971          |           |   |   | B |   | G   |
| Plastid       | Angiosperm - holoparasite      | <i>Hydnora visseri</i>                           | NC_029358.1       |           |   |   | B |   | G H |
| Plastid       | Angiosperm - holoparasite      | <i>Phelipanche purpurea</i>                      | NC_023132.1       |           |   |   |   |   | G   |
| Plastid       | Angiosperm - holoparasite      | <i>Pilotyles aethiopica</i>                      | KT981955          |           |   |   | B |   | G   |
| Plastid       | Angiosperm - holoparasite      | <i>Pilotyles hamiltonii</i>                      | KT981956          |           |   |   | B |   | G   |
| Plastid       | Angiosperm - mycoheterotroph   | <i>Epipogium aphyllum</i>                        | NC_026449.1       |           |   |   |   |   | G   |
| Plastid       | Angiosperm - mycoheterotroph   | <i>Epipogium roseum</i>                          | NC_026448.1       |           |   |   |   |   | G   |
| Plastid       | Angiosperm - mycoheterotroph   | <i>Monotropa uniflora</i>                        | NC_035582.1       |           |   |   | B |   |     |
| Plastid       | Angiosperm - mycoheterotroph   | <i>Sciaphila thaidanica</i>                      | MG757197          |           |   |   |   |   | G H |
| Plastid       | Angiosperm - mycoheterotroph   | <i>Thismia tentaculata</i>                       | KX171421          |           |   |   | B |   | G   |
| Plastid       | Gymnosperm - autotroph         | <i>Ginkgo biloba</i>                             | JN867583.1        | P         |   |   |   | A |     |
| Plastid       | Gymnosperm - autotroph         | <i>Pinus contorta</i>                            | NC_011153.4       | P         |   |   |   | A |     |
| Plastid       | Lycophyte - autotroph          | <i>Selaginella moellendorffii</i>                | NC_013086.1       | P         |   |   |   | A |     |
| Plastid       | Bryophyte - autotroph          | <i>Marchantia polymorpha</i>                     | NC_001319.1       |           |   |   |   | A |     |
| Plastid       | Bryophyte - autotroph          | <i>Physcomitrella patens</i>                     | NC_005087.1       | P         |   |   |   | A |     |
| Plastid       | Euglenid - nonphotosynthetic   | <i>Euglena longa</i>                             | NC_002652.1       |           |   |   | B |   |     |
| Plastid       | Green alga - parasite          | <i>Helicosporidium</i> sp.                       | NC_008100.1       |           |   |   | B |   | G H |
| Plastid       | Green alga - parasite          | <i>Prototheca zopfii</i>                         | NC_037450.1       |           |   |   |   |   | H   |
| Plastid       | Green alga - nonphotosynthetic | <i>Chlorella uvela</i>                           | KX828177          |           |   |   | B |   |     |
| Plastid       | Red alga - parasite            | <i>Choreocolax polysiphoniae</i>                 | NC_026522.1       |           |   |   | B |   |     |
| Plastid       | Red alga - autotroph           | <i>Bulboplastis apyrenoidosa</i> NIES-2742       | NC_034787.1       |           |   |   | B |   |     |
| Plastid       | Red alga - autotroph           | <i>Cyanidioschyzon merolae</i>                   | NC_004799.1       |           |   |   |   |   | H   |
| Plastid       | Diatom - nonphotosynthetic     | <i>Nitzschia</i> spp.                            | NC_028737.1       |           |   |   | B |   |     |
| Plastid       | Dinoflagellate - autotroph     | <i>Lepidodinium chlorophorum</i>                 | NC_027093.1       |           |   |   |   |   | H   |
| Plastid       | Brown alga - autotroph         | <i>Dictyopteris divaricata</i>                   | NC_036804.1       |           |   |   |   |   | H   |
| Plastid       | Apicomplexan - parasite        | <i>Babesia microti</i>                           | NC_034636.1       |           |   |   | B |   | H   |
| Plastid       | Apicomplexan - parasite        | <i>Eimeria tenella</i>                           | NC_004823.1       |           |   |   | B |   | G   |
| Plastid       | Apicomplexan - parasite        | <i>Plasmodium falciparum</i>                     | X95275-X95276     |           |   |   | C | B | G   |
| Plastid       | Apicomplexan - parasite        | <i>Toxoplasma gondii</i>                         | U87145            |           |   |   | C | B | G   |
| Mitochondrial | Excavate                       | <i>Acrasis kona</i> ATCC MYA-3509                | NC_026286.1       |           |   |   | B |   |     |
| Mitochondrial | Ciliate - parasite             | <i>Ichthyophthirius multifiliis</i> G5           | NC_015981.1       |           |   |   | B |   |     |
| Mitochondrial | Choanoflagellate               | <i>Monosiga brevicollis</i>                      | NC_004309.1       |           |   |   | B |   |     |
| Mitochondrial | Insect - parasite              | <i>Diadegma semiclausum</i>                      | NC_012708.1       |           |   |   | B |   |     |
| Mitochondrial | Roundworm                      | <i>Radopholus similis</i>                        | NC_013253.1       |           |   |   | B |   |     |
| Mitochondrial | Fungus                         | <i>Rozella allomycis</i>                         | NC_021611.1       |           |   |   | B |   |     |
| Mitochondrial | Yeast                          | <i>Nakaseomyces bacillisporus</i>                | NC_012621.1       |           |   |   | C | B |     |
| Mitochondrial | Yeast                          | <i>Saccharomyces cerevisiae</i> YJM1447          | CP006552          |           |   |   | B |   |     |
| Bacterial     | Proteobacteria                 | <i>Carsonella ruddii</i> CE isolate Thao2000     | SAMN02641648      |           |   |   | B |   |     |
| Bacterial     | Proteobacteria                 | <i>Escherichia coli</i> str. K-12 substr. MG1655 | U00096.3          |           |   |   |   |   |     |
| Bacterial     | Proteobacteria                 | <i>Nasuia deltocephalinicola</i>                 | SAMN06919537      |           |   |   | B |   |     |
| Bacterial     | Proteobacteria                 | <i>Zinderia insecticola</i> CARI                 | CP002161.1        |           |   |   | C | B |     |

\*P, phylogenomic and rate analyses (Figs. 4 and S10); C, codon and amino acid usage for five AT-rich genomes (Fig. S7); B, GC content of individual genes and whole gene sets for 30 AT-rich genomes (Fig. S5 and Table S5); A, alignments (Figs. 3B, S4, S12, and S13); G, plastome gene content (Fig. S6); H, features of highly compact plastomes (Table S9).

**A**

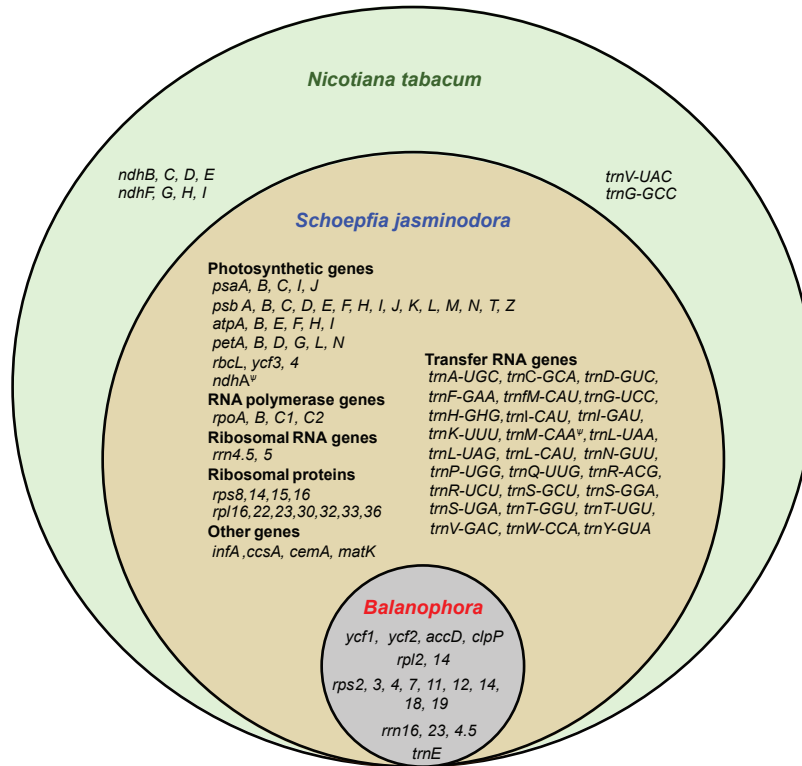

**B**

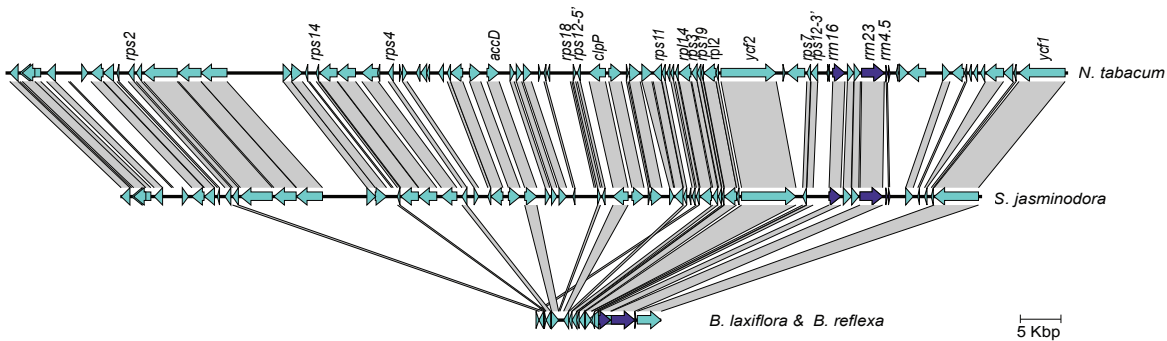

**Figure S1.** Gene content and order in the plastomes of *Nicotiana*, *Schoepfia*, and *Balanophora*. (A) Plastid gene content in *Balanophora* is a highly reduced subset of that in *Schoepfia* and *Nicotiana*. All genes listed in the gray, *Balanophora* portion of the figure are present in all three genomes. With the exception of *infA*, all genes listed in the tan, *Schoepfia* portion are shared with the *Nicotiana* genome. The genes listed in the green, *Nicotiana* portion are restricted to its genome. (B) Gene-order is colinear between the *N. tabacum* and *S. jasminodora* plastomes (one copy of the IR has been removed) and nearly colinear between these two plastomes and the two *Balanophora* plastomes, with the only difference being the relative location of *rpl14*. This colinearity plot was made using Easyfig v2.2.2 (16).

**A**

```

>>>>>>..>>>>.....<<<<>>>>.....<<<<>>>>.....>>>>.....<<<<<<<<<<<.
Nicotiana GCCCCCAUCGUCUAGU--GGUUUAGGACAUCUCUCUUCUAAGGAGGCAGCGGGGAUUCGAAUUCGCCUGGGGUA
Schoepfia .....C.....A.....C.....
B. lax. ....UU..G.....UUG..A...A...AU.-.U.....AA..AUU..A..A.U...A...A.U..AA...U
B. ref. ....UU..G.....UUG..A...A...AU.-----AA..AA..AUU..A..A.U.....A.U..AA...U
  
```

**B**

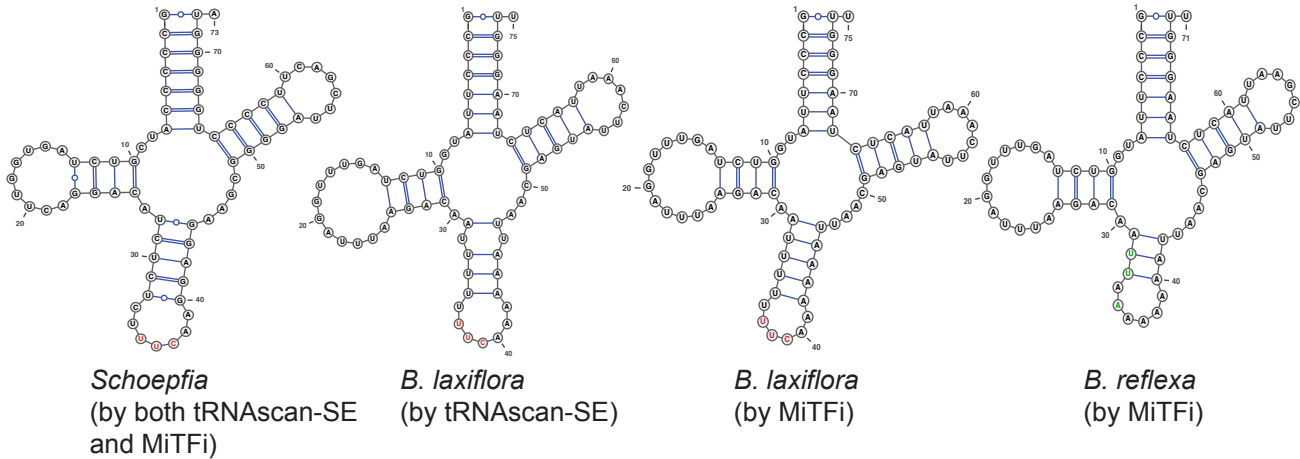

**Figure S2.** Primary sequence and secondary structure of plastome-encoded *trnE*. (A) Primary sequence alignment. Carets indicate regions of secondary base pairing in the *Nicotiana* and *Schoepfia* sequences, with red marking the acceptor arm, blue the D-loop arm, orange the anticodon-loop arm, and green the T-loop arm. The UUC anticodon sequence is boxed. Magenta lettering marks the eight nucleotides in the *Nicotiana* and *Schoepfia* sequences that correspond to sequence determinants for correct charging of tRNA<sup>Glu</sup>(UUC) in *E. coli* (17). All but one of these determinants is present in *B. laxiflora*. Green lettering marks the UUnA sequence that we propose is used in glutamate charging in *B. reflexa* in place of the normal UUnA charging determinants. (B) Secondary structure of tRNA<sup>Glu</sup>(UUC)-like molecules from *Schoepfia*, *B. laxiflora*, and *B. reflexa* as predicted by tRNAscan-SE v1.21 (18) and MiTFi v0.1 (19). Note that tRNAscan did not predict a structure for the *B. reflexa* sequence. UUC triplets located in anticodon loops are in red letters. Green letters in the *B. reflexa* structure are as in (A). Secondary structures were visualized using the VARNA java web start applet (<http://varna.lri.fr/>).

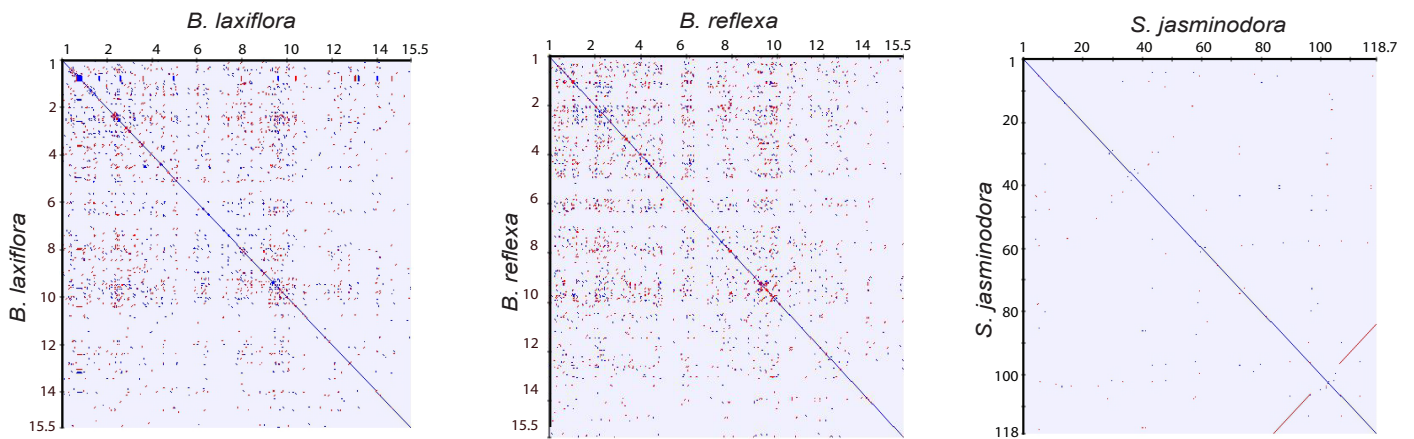

**Figure S3.** Self dotplots show the absence of a large inverted repeat in *Balanophora* plastomes, but the presence of one (of 12 kb in size) in *Schoepfia jasminodora*, as in the great majority of other angiosperm plastomes. Direct repeats are shown as blue dots or lines and inverted repeats as red dots or lines. These plots were made using a word size of 20 and identity of 85%. Dot plots were generated using Gepard (20).

# CLPP

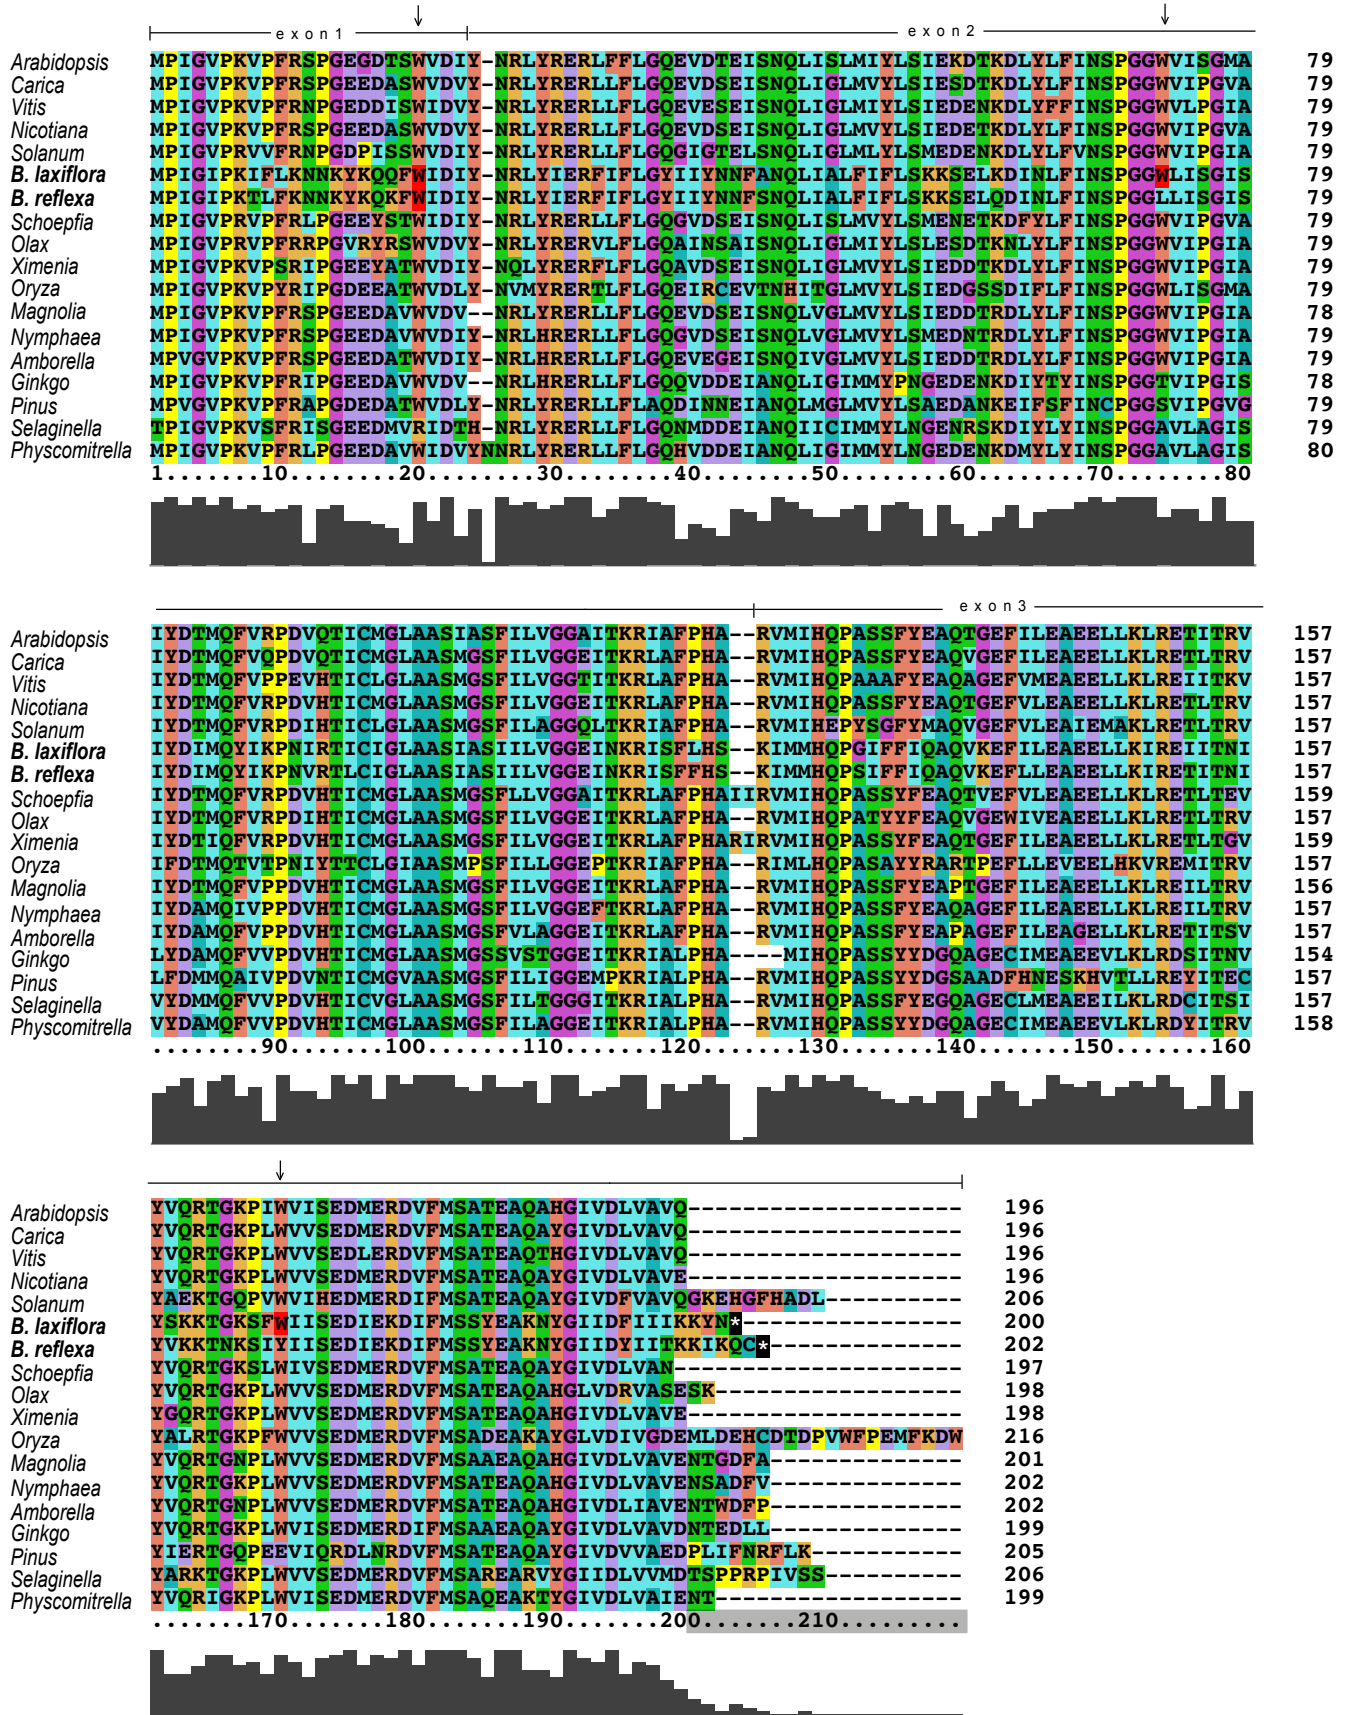

**Figure S4.** Inferred amino acid alignments of the 15 protein genes present in *Balanophora* plastomes. Stop codons are shown only for *Balanophora* and are shaded in gray (TGA) or black (TAA). The arrows mark internal TAG codons present in one or both *Balanophora* species and inferred to encode W; note that most or all non-*Balanophora* land plants contain TGG (W in the standard genetic code) at most of these positions (Table 1). Regions of ambiguous alignment are marked with boxes and were excluded from the phylogenetic and molecular evolutionary rate analyses (open box, only the *Balanophora* sequences were excluded; gray box, the entire region was excluded). The histograms give the percentage of the aligned sequences that share the most common amino acid at each position.



# ACCD

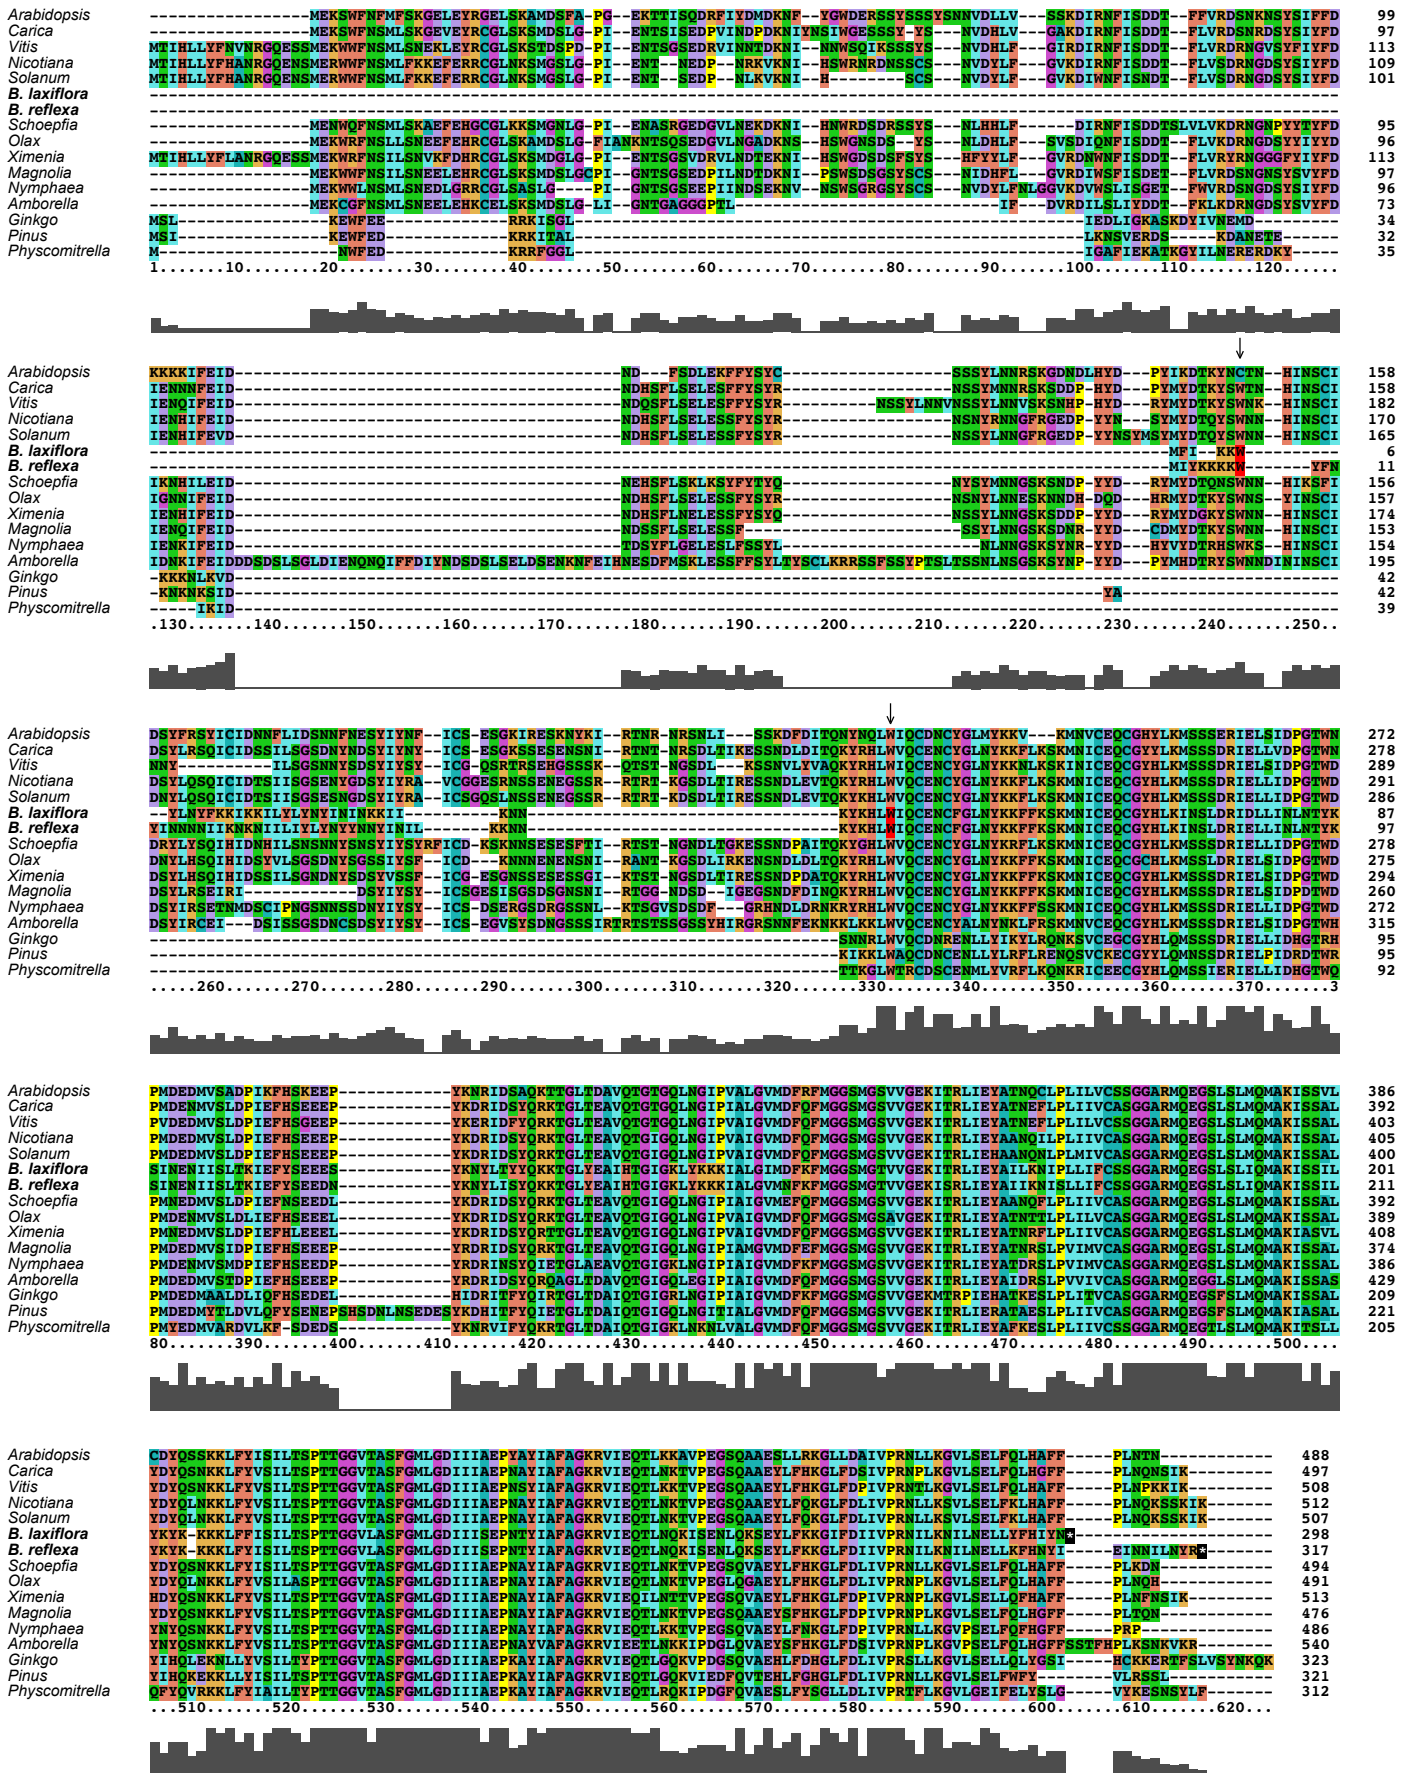

**Figure S4.** (cont.) Inferred amino acid alignments of the 15 protein genes present in *Balanophora* clades. Stop codons are shown only for *Balanophora* and are shaded in gray (TGA) or black (TAA). The arrows mark internal TAG codons present in one or both *Balanophora* species and inferred to encode W; note that most or all non-*Balanophora* and plants contain TGG (W in the standard genetic code) at most of these positions (Table 1). Regions of ambiguous alignment are marked with boxes and were excluded from the phylogenetic and molecular evolutionary rate analyses (open box, only the *Balanophora* sequences were excluded; gray box, the entire region was excluded). The histograms give the percentage of the aligned sequences that share the most common amino acid at each position.

# RPL2

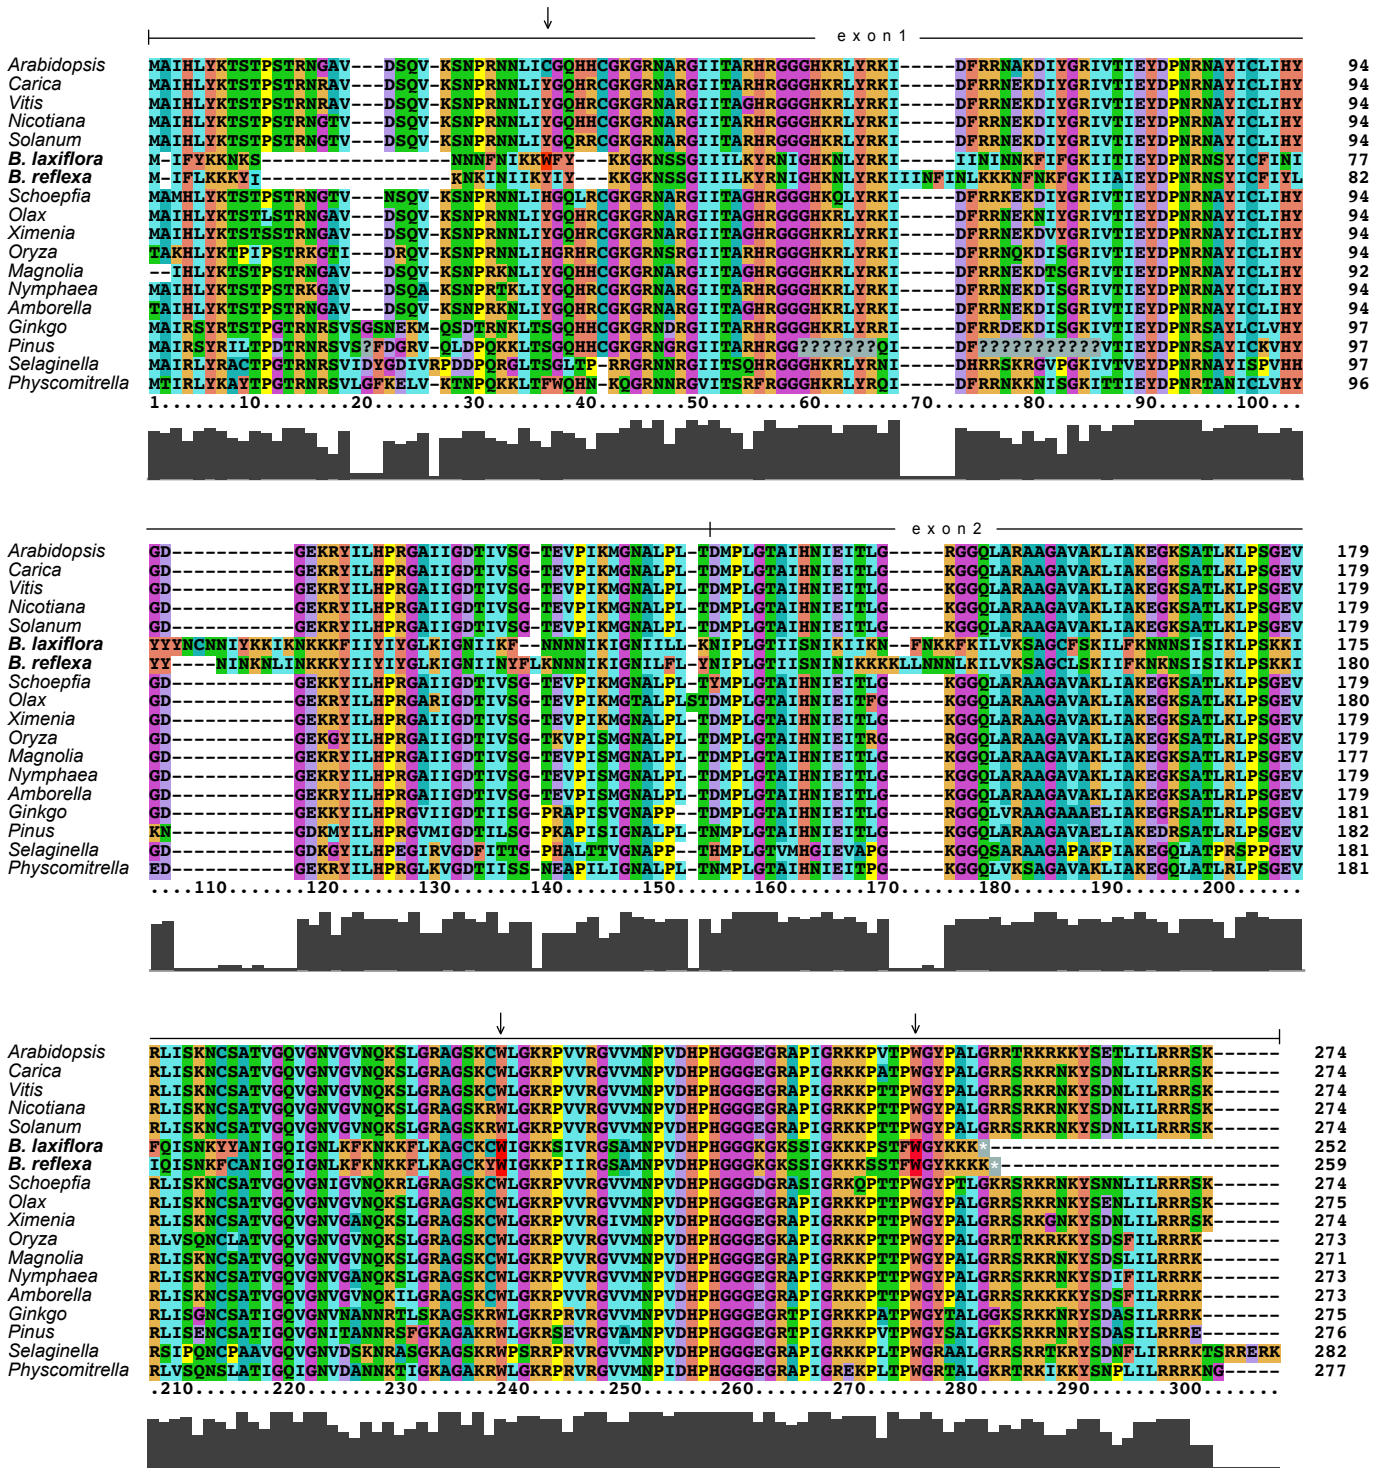

**Figure S4.** (cont.) Inferred amino acid alignments of the 15 protein genes present in *Balanophora* plastomes. Stop codons are shown only for *Balanophora* and are shaded in gray (TGA) or black (TAA). The arrows mark internal TAG codons present in one or both *Balanophora* species and inferred to encode W; note that most or all non-*Balanophora* and plants contain TGG (W in the standard genetic code) at most of these positions (Table 1). Regions of ambiguous alignment are marked with boxes and were excluded from the phylogenetic and molecular evolutionary rate analyses (open box, only the *Balanophora* sequences were excluded; gray box, the entire region was excluded). The histograms show the percentage of the aligned sequences that share the most common amino acid at each position.



# RPL14

|                            |                                                                                    |    |
|----------------------------|------------------------------------------------------------------------------------|----|
| <i>Arabidopsis</i>         | MIQPOTYLNVDNSGARELMCIRIIG--ASNRRYAHIGDVIVAVIKEAIPN--TPLERSEVIRAVIVRTCKELKRNGTII    | 77 |
| <i>Carica</i>              | MIQPOTHLNVADNSGARELMCIRIIG--ASNRRYAHIGDVIVAVIKEAVPN--TPLERSEVIRAVIVRTCKELKRNGMII   | 77 |
| <i>Vitis</i>               | MIQPOTHLNVADNSGARELMCIRIIG--TSNRRYAHIGDVIVAVIKEVVPN--MPLERSEVIRAVIVRTCKELKRDNGMII  | 77 |
| <i>Nicotiana</i>           | MIQPOTHLNVADNSGARELMCIRIIG--ASNRRYAHIGDVIVAVIKEAVPN--MPLERSEVVRVAVIVRTCKELKRDNGMII | 77 |
| <i>Solanum</i>             | MIQPOTHLNVADNSGARELMCIRIIG--ASNRRYAHIGDVIVAVIKEAVPN--MPLERSEVVRVAVIVRTCKELKRDNGMII | 77 |
| <b><i>B. laxiflora</i></b> | MI----YFNIIDNTGILKILCIKIL-----KPKFKIGNIIGI IKKIKKNNIYFKKSEIIKAIIRTRKILKRKSGILL     | 71 |
| <b><i>B. reflexa</i></b>   | MI----YFNIIDNTGIYKIFCI-----NKKFKIGNIIGI IKKIKKKN--FNFRKSEIIKAIIIHTRKIFKRKNGIIL     | 67 |
| <i>Schoepfia</i>           | MIQPOTCLNVADNSGARELMCIRIIG--TSNCRYAHIGDVIVAVIKEAIPN--MSLKRSEVIRAVIVRTCKELKRKNGMII  | 77 |
| <i>Olax</i>                | MIQPOTYLNVDNSGARELMCIRIVG--TRNRKYAHIGDVIVAVIKEAVPN--MPLQKSEVVRVAVIVRTCKELKRENGI II | 77 |
| <i>Ximenia</i>             | MIQPOTHLNVADNSGARELMCIRIVG--TSNRRYAHIGDVIVAAIKEAVPN--MPLARSEVVRVAVIVRTCKELKRENGMII | 77 |
| <i>Oryza</i>               | MIQPOTLLNVADNSGARKLMCIRVIG--ASNRYAHIGDVIVAVIKDAVPO--MPLERSEVIRAVIVRTCKEFKCEDGII I  | 78 |
| <i>Magnolia</i>            | MIQPOTHLNVADNSGARELMCIRIIG--ASNHRKYAHIGDVIVAVIKEAVPN--MPLERSEVIRAVIVRTCKELRRDNGMII | 77 |
| <i>Nymphaea</i>            | MIQPOTLLNVADNSGARKLMCIRIIG--ASNRYAHIGDVIVAVIKEAVPN--MPLERSEVIRAVIVRTCKELKRDNGMII   | 77 |
| <i>Amborella</i>           | MIQAOTYLNVDNSGARELMCIRIVG--ASNPRYAHIGDVIVAVIKEAVPN--MPLERSEVIRAVIVRTCKELKRDNGI II  | 77 |
| <i>Ginkgo</i>              | MIRPOTYLNVDNSGARKLMCIRVLG--VSNRYAHIGDVIIAIVKEAIPN--MPLKSEIVRAVVVRTCKELERDNGMVI     | 77 |
| <i>Pinus</i>               | MIQSOTYLNVDNSGARELMCIRVLG--ASNRCYAHIGDVIIAIVKEAVPN--MPLKSEVVRVAVIVRTCKEFERDNGMMI   | 77 |
| <i>Selaginella</i>         | TIRPOTYSNVADNSGARELMRIRVPG--ASNRYASIGDMIIAVVREAVPN--MPPKGEVVRVAVIARTKGLNRDNGMAI    | 77 |
| <i>Physcomitrella</i>      | MIQPOTYLNVDNSGARKLMCIQILG--ASNRYAHIGDIIAVVKEAIPN--MPLKSEVVRVAVVVRTCKELKRKNGTII     | 77 |

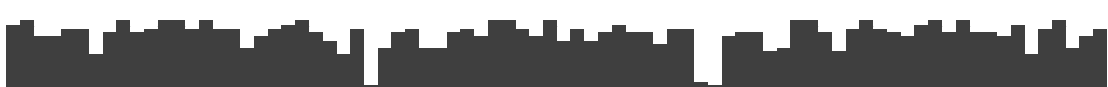

|                            |                                                   |     |
|----------------------------|---------------------------------------------------|-----|
| <i>Arabidopsis</i>         | RYDDNAAVVIDQEGNPKGTRVFGAIPRELRLNFTKIV---SLAPEVL   | 122 |
| <i>Carica</i>              | RYDDNAAVVIDQEGNPKGTRIFGAIAPRELRLNFTKIV---SLAPEVL  | 122 |
| <i>Vitis</i>               | RYDDNAAVVIDQEGNPKGTRIFGAIARELRLNFTKIV---SLAPEVL   | 122 |
| <i>Nicotiana</i>           | RYDDNAAVVIDQEGNPKGTRIFGAIARELRLNFTKIV---SLAPEVL   | 122 |
| <i>Solanum</i>             | RYDDNAAVVIDQEGNPKGTRIFGAIARELRLNFTKIV---SLAPEVL   | 122 |
| <b><i>B. laxiflora</i></b> | KYNKNTAIIINSENNPKGKIFGIIISWELLNLYLNKKIIIIINIFNKLE | 119 |
| <b><i>B. reflexa</i></b>   | KYSKNTAIIINLENNPKGKIFGIIISPELLNLFNKKIIIIINNNNKI   | 115 |
| <i>Schoepfia</i>           | RYDDNAAVVIDHEGNPKGTRVFGAIAARELROFNFTKIV---SLAPEVL | 122 |
| <i>Olax</i>                | RYDDNAAVVIDQEGNPKGTRIFGAIARELRLNFTKIV---SLAPEVL   | 122 |
| <i>Ximenia</i>             | RYDDNAAVVIDQEGNPKGTRVFGAIAARELKHFNFTKIV---SLASEVL | 122 |
| <i>Oryza</i>               | RYDDNAAVVIDQKGNPKGTRVFGAIAEELRELNFTKIV---SLAPEVL  | 123 |
| <i>Magnolia</i>            | RYDDNAAVVIDQEGNPKGTRVFGAIAARELRLNFTKIV---SLAPEVL  | 122 |
| <i>Nymphaea</i>            | RYDDNAAVVIDQEGNPKGTRVFGSIAARELRLNFTKIV---SLAPEVL  | 122 |
| <i>Amborella</i>           | RYDDNAAVVIDPEGNPKGTRVFGSIAAGELRHLNFTKIV---SLAPEVL | 122 |
| <i>Ginkgo</i>              | RSDDNAAVVIDQEGNPKGTRVFGSVARELROFNFTKIV---PLAPEVL  | 122 |
| <i>Pinus</i>               | RSDDNAAVVIDQEGNPKGTRVFGPVVQELRLNFTKIV---SLAPEVL   | 122 |
| <i>Selaginella</i>         | RFDDNAAVVIDREGNPKGTRVFGPVARESRCHFAKTIV---SSAPEVL  | 122 |
| <i>Physcomitrella</i>      | QFDDNAAVVIDQEGNPKGTRVFGPVARELRESNFTKIV---SLAPEVL  | 122 |

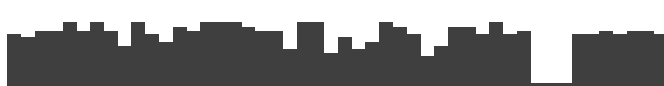

**Figure S4.** (cont.) Inferred amino acid alignments of the 15 protein genes present in *Balanophora* plastomes. Stop codons are shown only for *Balanophora* and are shaded in gray (TGA) or black (TAA). The arrows mark internal TAG codons present in one or both *Balanophora* species and inferred to encode W; note that most or all non-*Balanophora* and plants contain TGG (W in the standard genetic code) at most of these positions (Table 1). Regions of ambiguous alignment are marked with boxes and were excluded from the phylogenetic and molecular evolutionary rate analyses (open box, only the *Balanophora* sequences were excluded; gray box, the entire region was excluded). The histograms give the percentage of the aligned sequences that share the most common amino acid at each position.

# RPS2

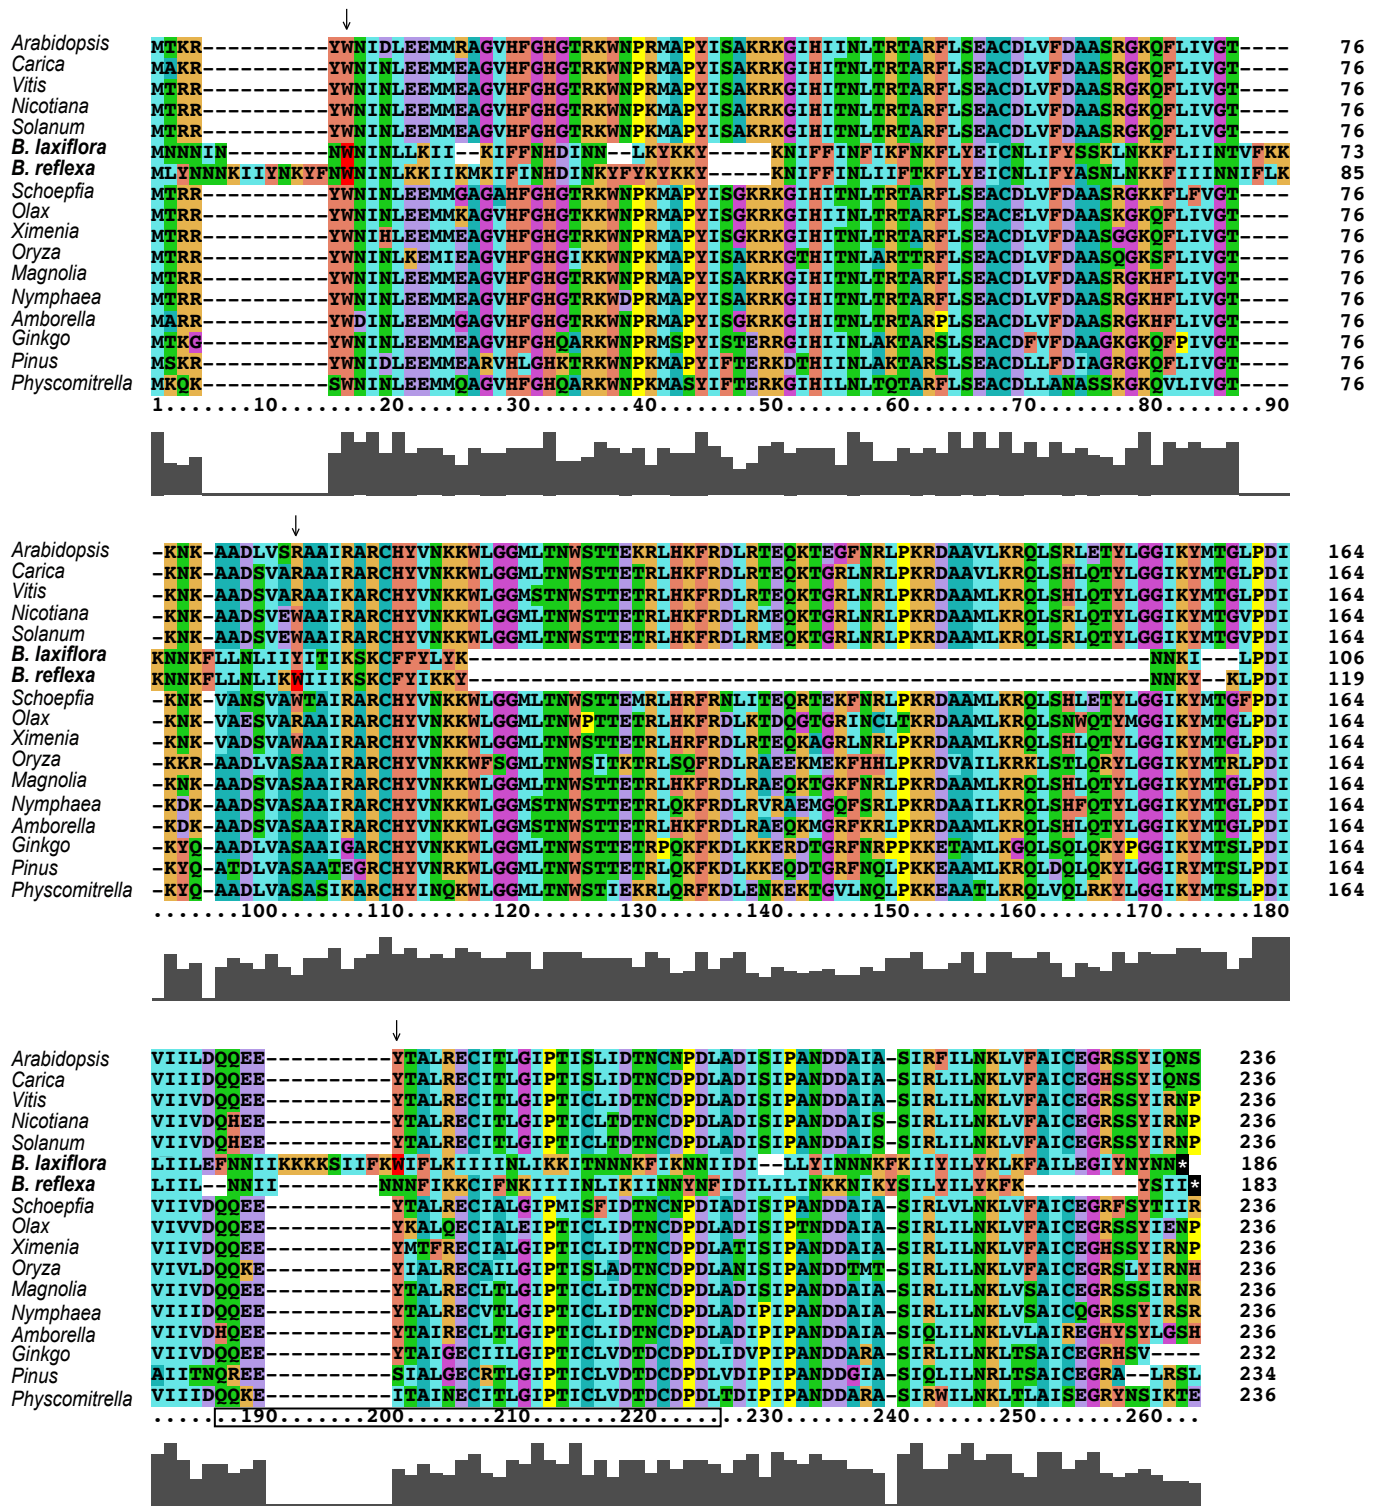

**Figure S4.** (cont.) Inferred amino acid alignments of the 15 protein genes present in *Balanophora* plastomes. Stop codons are shown only for *Balanophora* and are shaded in gray (TGA) or black (TAA). The arrows mark internal TAG codons present in one or both *Balanophora* species and inferred to encode W; note that most or all non-*Balanophora* and plants contain TGG (W in the standard genetic code) at most of these positions (Table 1). Regions of ambiguous alignment are marked with boxes and were excluded from the phylogenetic and molecular evolutionary rate analyses (open box, only the *Balanophora* sequences were excluded; gray box, the entire region was excluded). The histograms give the percentage of the aligned sequences that share the most common amino acid at each position.

# RPS3

|                       |                                                                                      |    |
|-----------------------|--------------------------------------------------------------------------------------|----|
| <i>Arabidopsis</i>    | MGC-KINPLGFRL-GTTQSHHSLWFAQPKNYSEGLEEDKKIRDCKIKNYVQKNIRISS-----GMEG                  | 59 |
| <i>Carica</i>         | MGC-KINPLGFRL-GTTQSHHSLWFAQPKNYSEGLEEDKKIRDFIKNYVKKNMRISS-----GVEG                   | 59 |
| <i>Vitis</i>          | MGC-KINPLGFRL-GTTQGHHSWFAQPKNYSKGLQEDQKIRDCIKNYVQKNIRISS-----GVEG                    | 59 |
| <i>Nicotiana</i>      | MGC-KINPLGFRL-GTTQGHHSWFAQPKNYSEGLEEDQKIRDCIKNYVQKNMRTSS-----GVEG                    | 59 |
| <i>Solanum</i>        | MGC-KINPLGFRL-GTTQSHHSLWFSQPKNYSEGLEEDKKIRDCIKNYVQKNMRTSS-----GIEG                   | 59 |
| <i>B. laxiflora</i>   | MIN-KINPLGFRL-NNNNYKNYFNYYLQHYFKY-----IKKYKYNIIILK-----KYNN                          | 51 |
| <i>B. reflexa</i>     | MINKKINPILFRI-NNNNYNYNYIKYKYNYYNYN-----IYFFKKIKYFI-----K-NN                          | 51 |
| <i>Schoepfia</i>      | MGC-KINPLSFRL-GTTHEHSLWFAQPKNYSEGLEEDQKMRDFLKNYVQKNMIRIYS-----GIEG                   | 59 |
| <i>Olax</i>           | MGR-KTNPLGFRL-GTTQDHYSLWFAQPKNYSENLOEDQKIRDSIKNYIQKNMIRISS-----SVEG                  | 59 |
| <i>Ximenia</i>        | MGC-KINPLGFRL-GTTQDHYSLWFAQPKNYSEGLEEDQKIRDCIKNYVQKNMRLS-----GVEG                    | 59 |
| <i>Oryza</i>          | MGC-KINPLGFRL-GTTQNHHSFWFAQPKNYSEGLEEDKKIRDCIKNYIQKNRKKGSNRKIEADSSFEVITHNKKMDSGSSSEV | 82 |
| <i>Magnolia</i>       | MGC-KINPLGFRL-GTTQSHRSFWFAQPKNYSKGLQEDQKIRDCIKNYVQKNMIRISS-----GFEG                  | 59 |
| <i>Nymphaea</i>       | MGC-KINPLGFRLGGENQKHSWFAQPKNYSIGLQEDQKIRDCIKNYVQKNMIRISS-----GFEG                    | 60 |
| <i>Amborella</i>      | MGC-KINPLGFRL-GTTQSHRSWFAQPKNYSKGLQEDQKIRDCIKNYVQKNMIRISS-----GFOG                   | 59 |
| <i>Ginkgo</i>         | MGC-KINPLGFRL-GVTQNHRSWFAQPKYSEDLOEDEEIRNCIENYVRRHMKNYS-----NYGG                     | 59 |
| <i>Pinus</i>          | MAQ-KINPLGFRL-GVTQNERSHWFAQPNYSKDLREDQKIRDCIENYVRRTHIKSSS-----NYGG                   | 65 |
| <i>Selaginella</i>    | TGR-KTNPPGFRL-GVTEKHHPNWYARPKIHDQYVREDKKVDCIDAYVHGRMWSN-----DVGGDGGAGG               | 59 |
| <i>Physcomitrella</i> | MGC-KINPLGFRL-GVTQNHRSWFAQPKYSEKLLQEDQKMRNCIENYVYKNIIRNS-----NYGG                    | 59 |

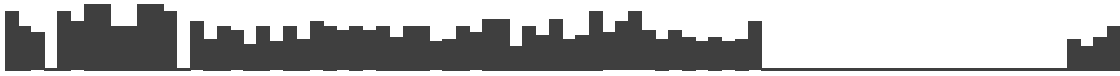

|                       |                                                                                      |     |
|-----------------------|--------------------------------------------------------------------------------------|-----|
| <i>Arabidopsis</i>    | IARIEIQKRIDLIOVIIYMGFPK-LLIEDK-PRRVEELOMNVOKEL-NCVNRKLNIAITRISNPYGDPNILAEFIAGOLKNRVS | 140 |
| <i>Carica</i>         | IARIEIQKRIDLIOVIIYMGFPK-LLIEDK-PRIEELQNVOKEL-NCVNRKLNIAIRIANPYGHPNILAEFIAGOLKNRVS    | 140 |
| <i>Vitis</i>          | IARIEIQKRIDLIOVIIYMGFPK-LLVEGK-PRRIEELQNVOKEL-NYVNRKLNIAITRITKPYGHPNILAEFIAGOLKNRVS  | 140 |
| <i>Nicotiana</i>      | IARIEIQKRIDLIOVIIYMGFPK-LLIESR-PRGIEELOMNVOKEL-HCVNRKLNIAVTRIAKPYGNPNILAEFIAGOLKNRVS | 140 |
| <i>Solanum</i>        | IARIEIQKRIDLIOVIIYMGFPK-LLIESR-PRGIEELOMNVOKEL-NCVNRKLNIAVTRIAKPYGNPNILAEFIAGOLKNRVS | 140 |
| <i>B. laxiflora</i>   | IYYLKLIVYIYNIIEIFI--IK-IYFISKILKNINKKIYF-----NIKK-YNNLFFYKIIPYVEYSKTFKFIKKNKNNIS     | 126 |
| <i>B. reflexa</i>     | IIFYKIFLYFYIIFLEFL--IK-ILFISKILKNINKKIYF-----NLKKIYFNLFYKIKPYVEYSKTFKFIKKNKNNIS      | 127 |
| <i>Schoepfia</i>      | IARIEIQKRIDLIOVIIYMGFPK-LLIEGK-PRIEELOMNVOKEL-NYVNRKLNITITRIVKPYGHPNILAEFIAGOLKNRVS  | 140 |
| <i>Olax</i>           | LSRIKIQKRIDLIOVIIYMGFPK-LLIESR-PRIEEFQMKIQKEL-NYVNRKLNITITRIAKPYGSPILAEFIAGOLKNRVS   | 140 |
| <i>Ximenia</i>        | IERIEIQKRIDLIOVIIYMGFPK-LLIEGK-PRGIEELOMNVOKEL-NYVNRKLNIAITRIVKPYGHPNNAKFIAGOLKNRVS  | 140 |
| <i>Oryza</i>          | ITHIEIQKEIDIHVHIHGFN-LL-KKK-G??IELEKDLQKEV-NSVNRKLNIGIEKVKPYRPNILAEYIAFOLKNRVS       | 162 |
| <i>Magnolia</i>       | IARIDIKKRIDLIOVIIHIGFAN-MLMEGR-ARGIEELOMNVOKSF-HSVNRKLNIAIARVARPYGHPNILAEYIALOLKNRVS | 140 |
| <i>Nymphaea</i>       | IAHIEIQKRIDLIOVIIYGFN-LLIEGR-TRGIEELOMNVOKGF-NSVNRKLNIAITRIVKPYGHPNILAEYIALOLKNRVS   | 141 |
| <i>Amborella</i>      | IARLGIQKRIDLIOVIIYIGSSN-LLIEGP-TRGIEELRDVQKEL-NSMNRKLNITITRIARPYGHPNILAEYIALOLKNRVS  | 140 |
| <i>Ginkgo</i>         | IARVEIRRRKIDLIOVEIHIGFNP-LLIEDR-GRGIEQLRVDVQKEL-NSANRKLNSIAKVAKPYGHPNILAEYIALQLEDKRV | 140 |
| <i>Pinus</i>          | IARVEIRRRIDLKVKIYIGFNP-LLIEGR-GGIEELRNDVQKEL-DSVDRKLNIAIEKVAKPYRPNILAEYIALQLEKRV     | 141 |
| <i>Selaginella</i>    | IARVEIRRRKIDLPTVEIHAGSPA-ILIRSH-GRGIEQLRNVKRNDSWSWIGRVHITPSEISEPYGHPNTPAKHIAPQPKNRVA | 147 |
| <i>Physcomitrella</i> | IARIEIRRRKIDLIOVEIHIGFPA-LLVENR-KRGIEQLKTDVOSIL-TSGDRKLRMTLTVTKPYGHPNILAEYIALQLESRA  | 140 |

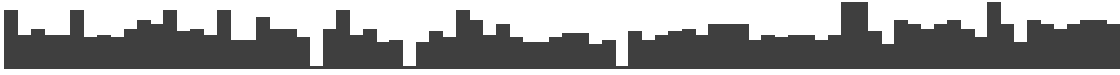

|                       |                                                                                                 |     |
|-----------------------|-------------------------------------------------------------------------------------------------|-----|
| <i>Arabidopsis</i>    | FRKAMKKAIELTEQAN---TKGIOVQIAGRIDGKEIARVEWIREGRVPLQTIKIDYCSYTVRTIYGVLGIKIWIIFVDEE-               | 218 |
| <i>Carica</i>         | FRKAMKKAIELTEQAN---TKGIOVQIAGRIDGKEIARVEWIREGRVPLQTIKIDYCSYTVRTIYGVLGIKIWIIFVDEE-               | 218 |
| <i>Vitis</i>          | FRKAMKKAIELTEQAD---TKGIOVQIAGRIDGKEIARVEWIREGRVPLQTIKIDYCSYTVRTIYGVLGIKIWIIFVDEE-               | 218 |
| <i>Nicotiana</i>      | FRKAMKKAIELTEQAD---TKGIOVQIAGRIDGKEIARVEWIREGRVPLQTIKIDYCSYTVRTIYGVLGIKIWIIFVDEE-               | 218 |
| <i>Solanum</i>        | FRKAMKKAIELTEQAD---TKGIOVQIAGRIDGKEIARVEWIREGRVPLQTIKIDYCSYTVRTIYGVLGIKIWIIFVDEE-               | 218 |
| <i>B. laxiflora</i>   | FLKIIKKIFNLIEKIKIKIKGKIIISGKINNKIKYIEYIKKGKIPKNNKINIDFYFHSIKTKYGLIGIKIYIYI-IK*                  | 208 |
| <i>B. reflexa</i>     | FLKIIKKIFNLIEKIKIKIKGKIKIKISGKINNKIKYIEYIKKGKIPKNNKINIDFYFHSIKTKYGLIGIKIYIYI-IK*                | 208 |
| <i>Schoepfia</i>      | FRKAMKKAIELTEQTD---TKGIOVQIAGRIDGKEIARVEWIREGRVPLQTIKIDYCSYPIRTIYGVLGIKIWIIFSEY-                | 218 |
| <i>Olax</i>           | FRKAMKKAIELTEYAD---TKGIOVQIAGRIDGKEIARVEWIREGRVPLQTIKIDYCSYPIRTIYGVLGIKIWIIFDRE-                | 218 |
| <i>Ximenia</i>        | FRKAMKKAIELAEQAD---TKGIOVQIAGRIDGKEIARVEWIREGRVPLQTIKIDYCSYPIRTIYGVAFGIKWIIFVDEE-               | 218 |
| <i>Oryza</i>          | FRKAMKKAIELTKKTD---IKGVKVIAGRLAGKEIARAEICKGRVPLQTIKIDYCSYPIRTIYGVLGKVIWIIFVDEE-                 | 240 |
| <i>Magnolia</i>       | FRKAMKKAIELAEQAD---AKGIOVQIAGRIDGKEIARVEWIREGRVPLQTIKIDYCSYPIRTIYGVLDHCSYVVRTIYGVLGIKIWIIFVDEE- | 218 |
| <i>Nymphaea</i>       | FRKAMKKAIELTEQAD---TKGIOVQIAGRIDGKEIARVEWIREGRVPLQTIKIDHCSYVVRTIYGVLGIKIWIIFVDEE-               | 219 |
| <i>Amborella</i>      | FRKAMKKAIELAEQAD---TKGIRVQIAGRLNGKEIARVEWIREGRVPLHTIRAKIDYCSYVVRTIYGVLGIKIWIIFVDEE-             | 218 |
| <i>Ginkgo</i>         | FRKTVKKAIELAEQAD---IRGIVQIAGRLDNGEIAARVEWIREGRVPLQTIKIDHCSYVPAKTIYGVLGIKIWIIFVDEE-              | 218 |
| <i>Pinus</i>          | FRKIMKKAIELAERE---VEGIVQIAGRLDNGEIAARVEWIREGRVPLQTIKIDYCSYVVRTIYGVLGKVIWIIFVDEE---              | 217 |
| <i>Selaginella</i>    | FRRTMKKATEPAKRN---RKGIKIQIAGRLNGEIAARVEWIREGRVPLQTIKIDYCSYVPAKTIYGVVSGKVRVIRLDE---              | 224 |
| <i>Physcomitrella</i> | FRRTMKKATELAKTN---IKGIKIQIAGRLNGEIAARVEWIREGRVPLQTIKIDYCSYVPAKTIYGVLGIKIWIIFVDEK-               | 218 |

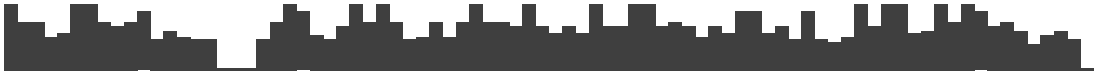

**Figure S4.** (cont.) Inferred amino acid alignments of the 15 protein genes present in *Balanophora* plastomes. Stop codons are shown only for *Balanophora* and are shaded in gray (TGA) or black (TAA). The arrows mark internal TAG codons present in one or both *Balanophora* species and inferred to encode W; note that most or all non-*Balanophora* and plants contain TGG (W in the standard genetic code) at most of these positions (Table 1). Regions of ambiguous alignment are marked with boxes and were excluded from the phylogenetic and molecular evolutionary rate analyses (open box, only the *Balanophora* sequences were excluded; gray box, the entire region was excluded). The histograms give the percentage of the aligned sequences that share the most common amino acid at each position.

# RPS4

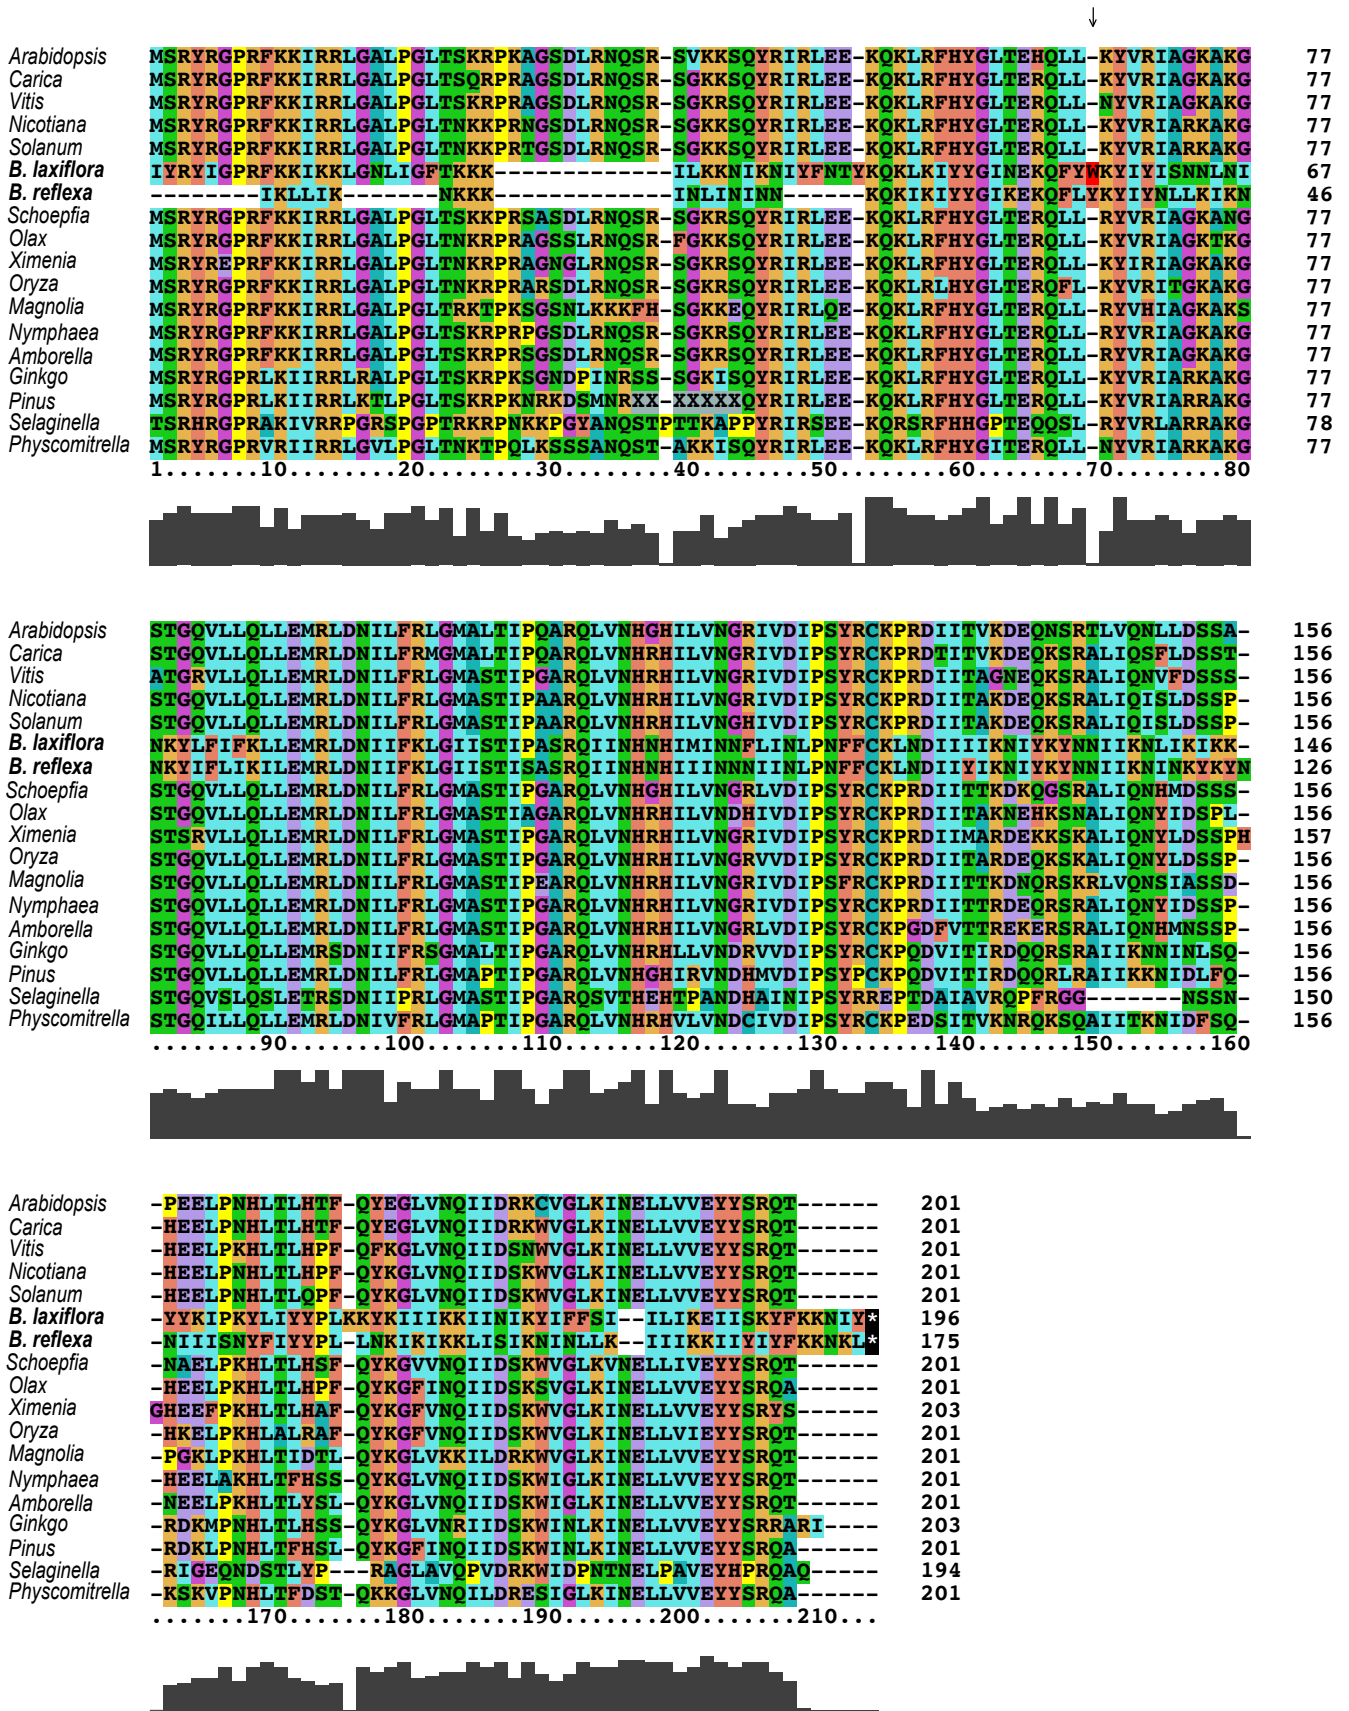

**Figure S4.** (cont.) Inferred amino acid alignments of the 15 protein genes present in *Balanophora* plastomes. Stop codons are shown only for *Balanophora* and are shaded in gray (TGA) or black (TAA). The arrows mark internal TAG codons present in one or both *Balanophora* species and inferred to encode W; note that most or all non-*Balanophora* and plants contain TGG (W in the standard genetic code) at most of these positions (Table 1). Regions of ambiguous alignment are marked with boxes and were excluded from the phylogenetic and molecular evolutionary rate analyses (open box, only the *Balanophora* sequences were excluded; gray box, the entire region was excluded). The histograms give the percentage of the aligned sequences that share the most common amino acid at each position.



# RPS7

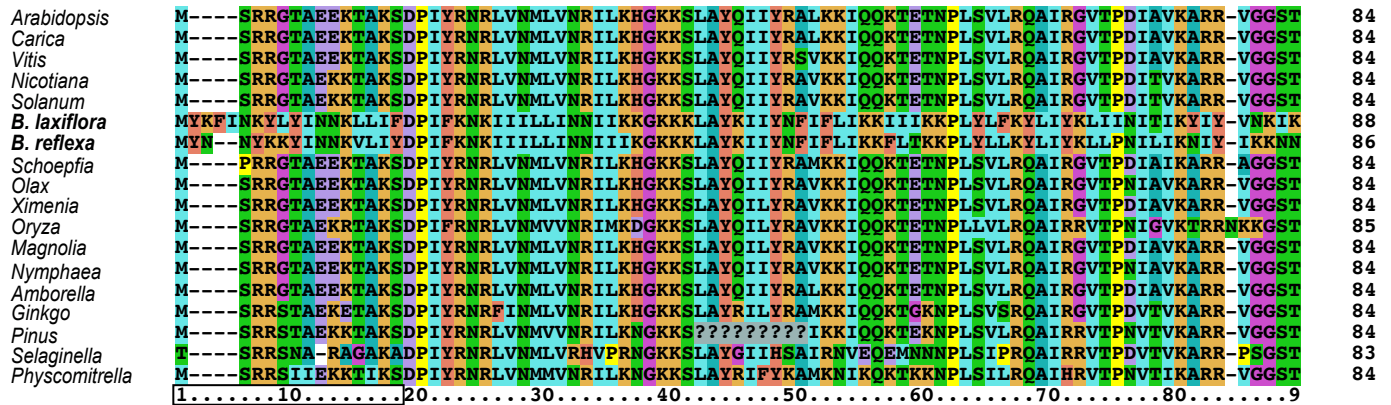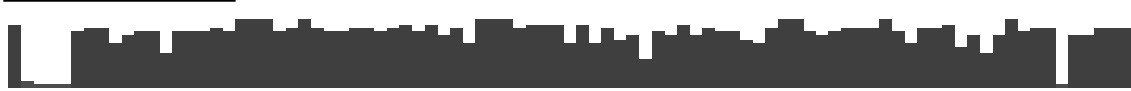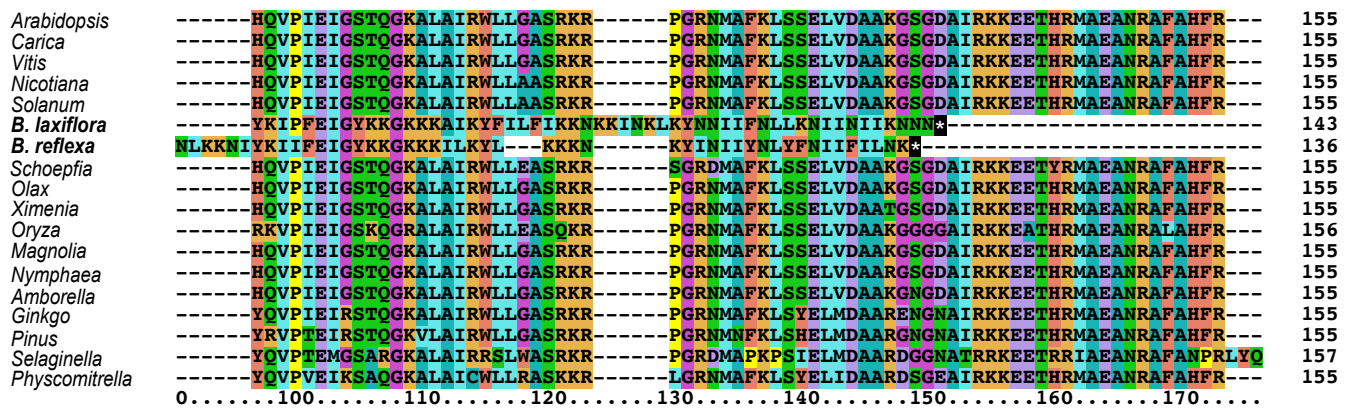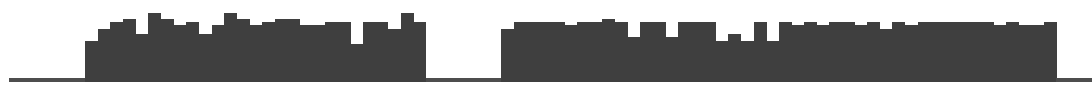

**Figure S4.** (cont.) Inferred amino acid alignments of the 15 protein genes present in *Balanophora* plastomes. Stop codons are shown only for *Balanophora* and are shaded in gray (TGA) or black (TAA). The arrows mark internal TAG codons present in one or both *Balanophora* species and inferred to encode W; note that most or all non-*Balanophora* and plants contain TGG (W in the standard genetic code) at most of these positions (Table 1). Regions of ambiguous alignment are marked with boxes and were excluded from the phylogenetic and molecular evolutionary rate analyses (open box, only the *Balanophora* sequences were excluded; gray box, the entire region was excluded). The histograms give the percentage of the aligned sequences that share the most common amino acid at each position.

# RPS11

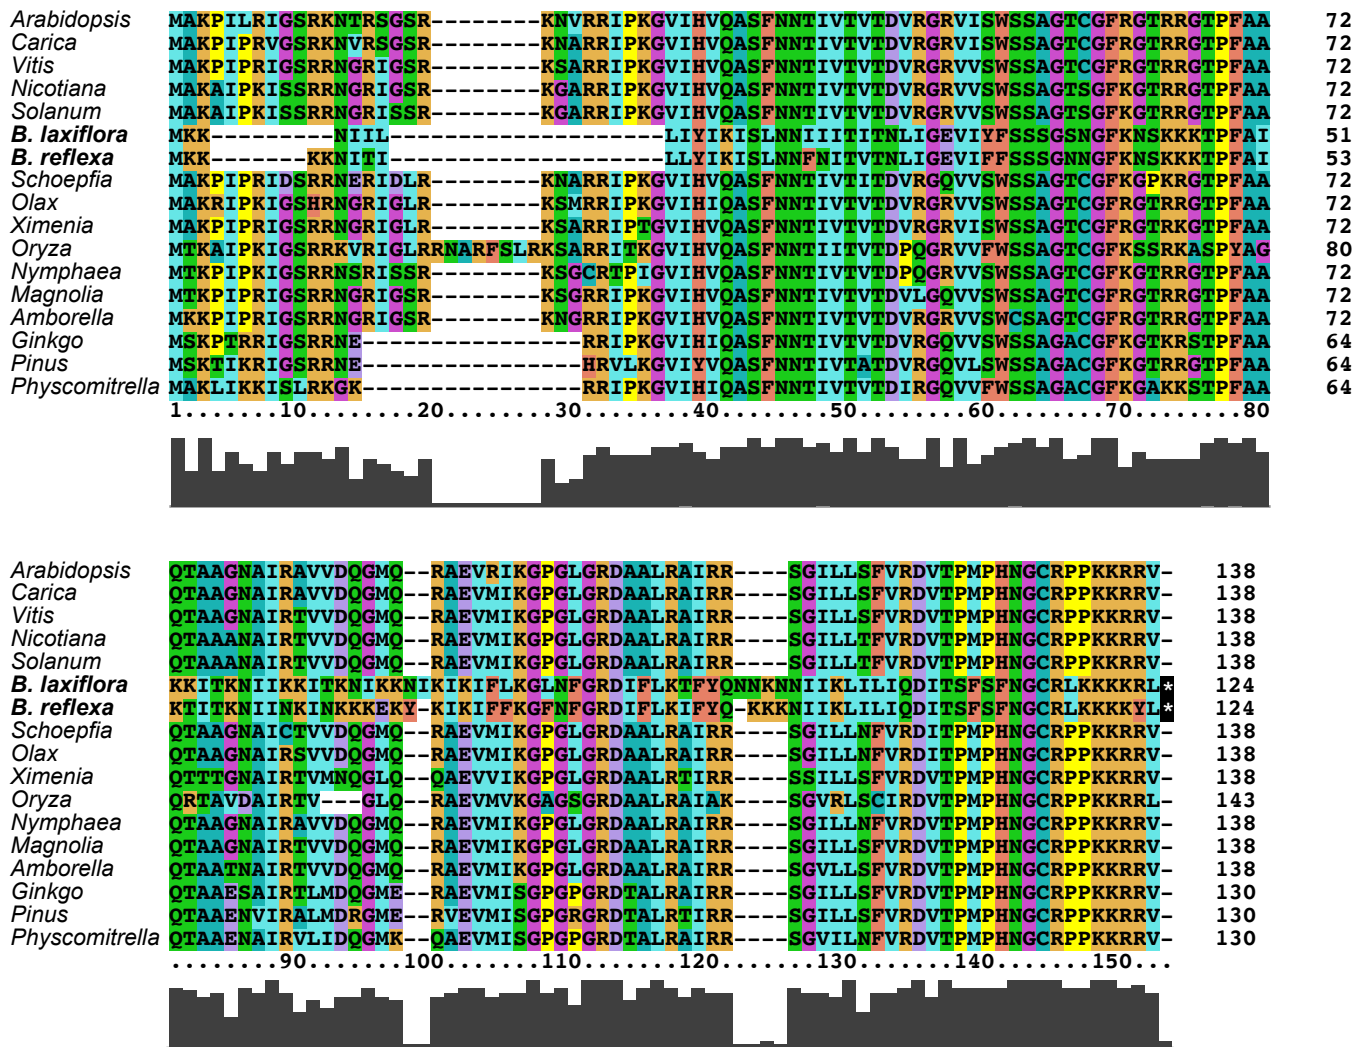

**Figure S4.** (cont.) Inferred amino acid alignments of the 15 protein genes present in *Balanophora* plastomes. Stop codons are shown only for *Balanophora* and are shaded in gray (TGA) or black (TAA). The arrows mark internal TAG codons present in one or both *Balanophora* species and inferred to encode W; note that most or all non-*Balanophora* and plants contain TGG (W in the standard genetic code) at most of these positions (Table 1). Regions of ambiguous alignment are marked with boxes and were excluded from the phylogenetic and molecular evolutionary rate analyses (open box, only the *Balanophora* sequences were excluded; gray box, the entire region was excluded). The histograms give the percentage of the aligned sequences that share the most common amino acid at each position.

# RPS12

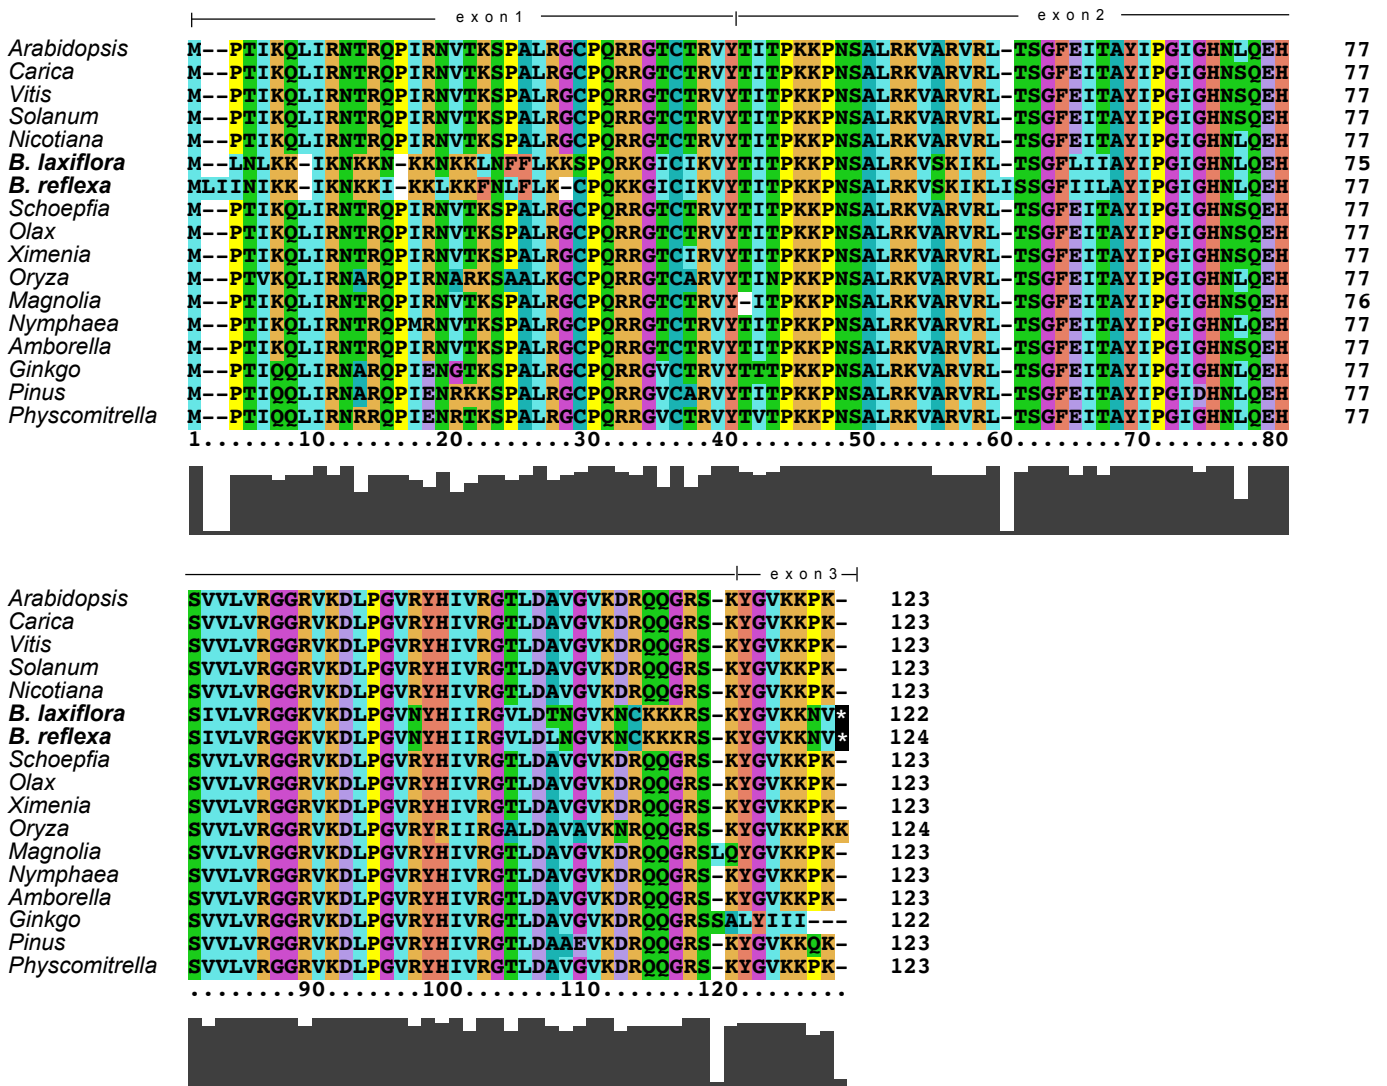

**Figure S4.** (cont.) Inferred amino acid alignments of the 15 protein genes present in *Balanophora* plastomes. Stop codons are shown only for *Balanophora* and are shaded in gray (TGA) or black (TAA). The arrows mark internal TAG codons present in one or both *Balanophora* species and inferred to encode W; note that most or all non-*Balanophora* and plants contain TGG (W in the standard genetic code) at most of these positions (Table 1). Regions of ambiguous alignment are marked with boxes and were excluded from the phylogenetic and molecular evolutionary rate analyses (open box, only the *Balanophora* sequences were excluded; gray box, the entire region was excluded). The histograms give the percentage of the aligned sequences that share the most common amino acid at each position.

# RPS14

|                       |                                                                                                                                                 |    |
|-----------------------|-------------------------------------------------------------------------------------------------------------------------------------------------|----|
| <i>Arabidopsis</i>    | MAKKS <b>LI</b> YREKKR <b>OKLE</b> KKYHLIRRS <b>SKKEI</b> -SKI--PSLSEKWKI <b>HGKLOS</b> PPRNSAP <b>TRLHRRCF</b> STGRPRANYRDFG                   | 78 |
| <i>Carica</i>         | MAKKS <b>LI</b> HREKKR <b>OKLE</b> QKYHLIRRS <b>SKKEI</b> -SKV--PSLSDKWKI <b>HGKLOS</b> PPRNSAP <b>TRLHRRCF</b> STGRPRANYRDFG                   | 78 |
| <i>Vitis</i>          | MARK <b>SLI</b> QREKKR <b>OKLE</b> QKYHLIRRS <b>SKKEI</b> -SKV--PSLSDKWEI <b>HGKLOS</b> PPRNSAP <b>TRLHRRCF</b> L <b>TGRPG</b> ANYRYFG          | 78 |
| <i>Nicotiana</i>      | MARK <b>SLI</b> QREKKR <b>OKLE</b> QKYH <b>S</b> IRRS <b>SKKEI</b> -SKV--PSLSDKWEI <b>YGKLOS</b> PPRNSAP <b>TRLHRRCF</b> L <b>TGR</b> PRANYRDFG | 78 |
| <i>Solanum</i>        | MARK <b>SLI</b> QREKKR <b>OKLE</b> QKYH <b>S</b> IRRS <b>SKKEI</b> -SKV--PSLSDKWEI <b>YGKLOS</b> LPRNSAP <b>TRLHRRCF</b> L <b>TGR</b> PRANYRDFG | 78 |
| <i>B. laxiflora</i>   | MKHY-----YIQYKYN <b>IYLYY</b> KKILLKKN-----IKIROYCYLTKKKKSILKNFL                                                                                | 47 |
| <i>B. reflexa</i>     | MIKF-----YNNKIIF <b>IYFY</b> FKIYKYK-----KNKKOYCYITKKKRSILKNFL                                                                                  | 44 |
| <i>Schoepfia</i>      | MARK <b>SLI</b> HREKKR <b>OKLE</b> QKYHLIRRS <b>SKKEI</b> -SKL--PSLSDKWEI <b>HGKLOS</b> PPRNSAP <b>IRLHRRCF</b> ATGRPRANYRDFG                   | 78 |
| <i>Olax</i>           | MARK <b>SLI</b> QREN <b>KR</b> KKLEQKYHLIRRS <b>SKKEI</b> -SKV--SSLSDKWKI <b>HGKLOS</b> LPRSSAP <b>TRLHRRCF</b> STGRSRANYRDFG                   | 78 |
| <i>Ximenia</i>        | MAKKS <b>LI</b> QREKKR <b>OKLE</b> QKYHLIRRS <b>SKKEI</b> -SKV--PSLNDKWKI <b>HGKLOS</b> PPRNSAP <b>TRLHRRCF</b> STGRPRANYRDFG                   | 78 |
| <i>Oryza</i>          | MAKKS <b>LI</b> QREKKR <b>OKLE</b> QKYHLIRRS <b>SKKEI</b> RSKVYPLSLSEK <b>TKMREK</b> LOS <b>LPRNSAP</b> TRLHRRCF <b>L</b> TGRPRANYRDFG          | 81 |
| <i>Magnolia</i>       | MARK <b>SLI</b> QREKKR <b>OKLE</b> QKYHLIRRS <b>SKKEI</b> -SKV--SSLSDKWEI <b>HGKLOS</b> PPRNSAP <b>TRLHRRCF</b> STGRPRANYRDFG                   | 78 |
| <i>Nymphaea</i>       | MARK <b>SLI</b> QREKKR <b>OKLE</b> QKYHLIRRS <b>SKKEI</b> -SKV--SSLDEKWEI <b>HVKLOS</b> PPRNSAP <b>IRLHRRCF</b> L <b>TGR</b> PRANYRDFG          | 78 |
| <i>Amborella</i>      | MARK <b>SLI</b> QREKKR <b>OKLE</b> QKYHLIRRS <b>LKKEI</b> -SKT--PSLSDKWKI <b>HGKLOS</b> PPRNSAP <b>IRLHRRCF</b> STGRPRANYRDFG                   | 78 |
| <i>Ginkgo</i>         | MARK <b>SII</b> QREKKR <b>OKLE</b> RKYHLIR <b>OSPERE</b> I-SEV--SSLDEKWEI <b>HRKLOS</b> PPRNSAP <b>TRLHRRCF</b> STGRPRANYRDFG                   | 78 |
| <i>Pinus</i>          | MARK <b>SLI</b> QREKKR <b>OKLE</b> RKYHLIR <b>OSL</b> -EEK-SKV--SSLDKWEI <b>HRKLOS</b> PPRNSAP <b>TRLHRRCS</b> STGRPRANYRDFG                    | 77 |
| <i>Selaginella</i>    | TAKK <b>GVI</b> RR <b>EKG</b> GLGNKYH <b>S</b> IRRS <b>LKARM</b> -GEA--SSLDGRWDI <b>HKEL</b> OSLPRNSAP <b>TRLHRRCF</b> L <b>TGR</b> PGGNYRYFG   | 78 |
| <i>Physcomitrella</i> | MAKKS <b>LI</b> EREKKR <b>OKLE</b> KKY <b>QDFRHS</b> IKKKI-KET--SSLDEKWE <b>FQKOL</b> ALPRNSAP <b>TRLHRRCF</b> L <b>TGR</b> PRANYRDFG           | 78 |

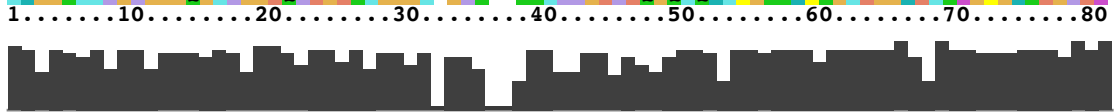

|                       |                                                                       |     |
|-----------------------|-----------------------------------------------------------------------|-----|
| <i>Arabidopsis</i>    | LSGHILREM <b>VOAC</b> -LLPGATR <b>SSW</b> -                           | 100 |
| <i>Carica</i>         | LSGHILREM <b>VHAC</b> -LLPGATR <b>SSW</b> -                           | 120 |
| <i>Vitis</i>          | LSGHILREM <b>VHAC</b> -LLPGATR <b>SSW</b> -                           | 120 |
| <i>Nicotiana</i>      | LSGHILREM <b>VHAC</b> -LLPGATR <b>SSW</b> -                           | 120 |
| <i>Solanum</i>        | LSGHILREM <b>VHAC</b> -LLPGATR <b>SSW</b> -                           | 120 |
| <i>B. laxiflora</i>   | LSRYLIHLL <b>INKW</b> -LLSGFKR <b>NNW</b> *                           | 70  |
| <i>B. reflexa</i>     | LSRYIIRII <b>INKY</b> LLSGFKK <b>YYW</b> *                            | 68  |
| <i>Schoepfia</i>      | LSGHILREM <b>VHAC</b> -LFP <b>GV</b> TR <b>SSW</b> -                  | 100 |
| <i>Olax</i>           | LSGHILREM <b>VHAC</b> -LLPGATR <b>STW</b> -                           | 100 |
| <i>Ximenia</i>        | LSGHILREM <b>VHAC</b> -LLPGATR <b>SSW</b> -                           | 100 |
| <i>Oryza</i>          | LSGHILREM <b>VYAC</b> -LLPGATR <b>SSW</b> -                           | 100 |
| <i>Magnolia</i>       | LSGHILRE <b>RVHAC</b> -LLPGATR <b>SSW</b> -                           | 100 |
| <i>Nymphaea</i>       | LSGHV <b>L</b> REM <b>VHAC</b> -LLPGATR <b>SSW</b> -                  | 100 |
| <i>Amborella</i>      | LSGHV <b>L</b> REM <b>VHAC</b> -LLPGATR <b>SSW</b> -                  | 100 |
| <i>Ginkgo</i>         | LSGHV <b>LRR</b> MA <b>HAC</b> -LLPG <b>MK</b> SS <b>W</b> -          | 100 |
| <i>Pinus</i>          | LSGHILRE <b>MAHAC</b> -LLPG <b>IT</b> KS <b>SW</b> -                  | 99  |
| <i>Selaginella</i>    | LSRH <b>V</b> PRE <b>TAHAC</b> -LLPG <b>PV</b> KS <b>SW</b>           | 101 |
| <i>Physcomitrella</i> | LSRH <b>V</b> LE <b>MAHAC</b> -FL <b>P</b> GV <b>T</b> KS <b>SW</b> - | 100 |

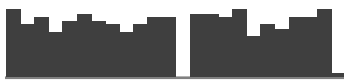

**Figure S4.** (cont.) Inferred amino acid alignments of the 15 protein genes present in *Balanophora* plastomes. Stop codons are shown only for *Balanophora* and are shaded in gray (TGA) or black (TAA). The arrows mark internal TAG codons present in one or both *Balanophora* species and inferred to encode W; note that most or all non-*Balanophora* and plants contain TGG (W in the standard genetic code) at most of these positions (Table 1). Regions of ambiguous alignment are marked with boxes and were excluded from the phylogenetic and molecular evolutionary rate analyses (open box, only the *Balanophora* sequences were excluded; gray box, the entire region was excluded). The histograms give the percentage of the aligned sequences that share the most common amino acid at each position.



# RPS18

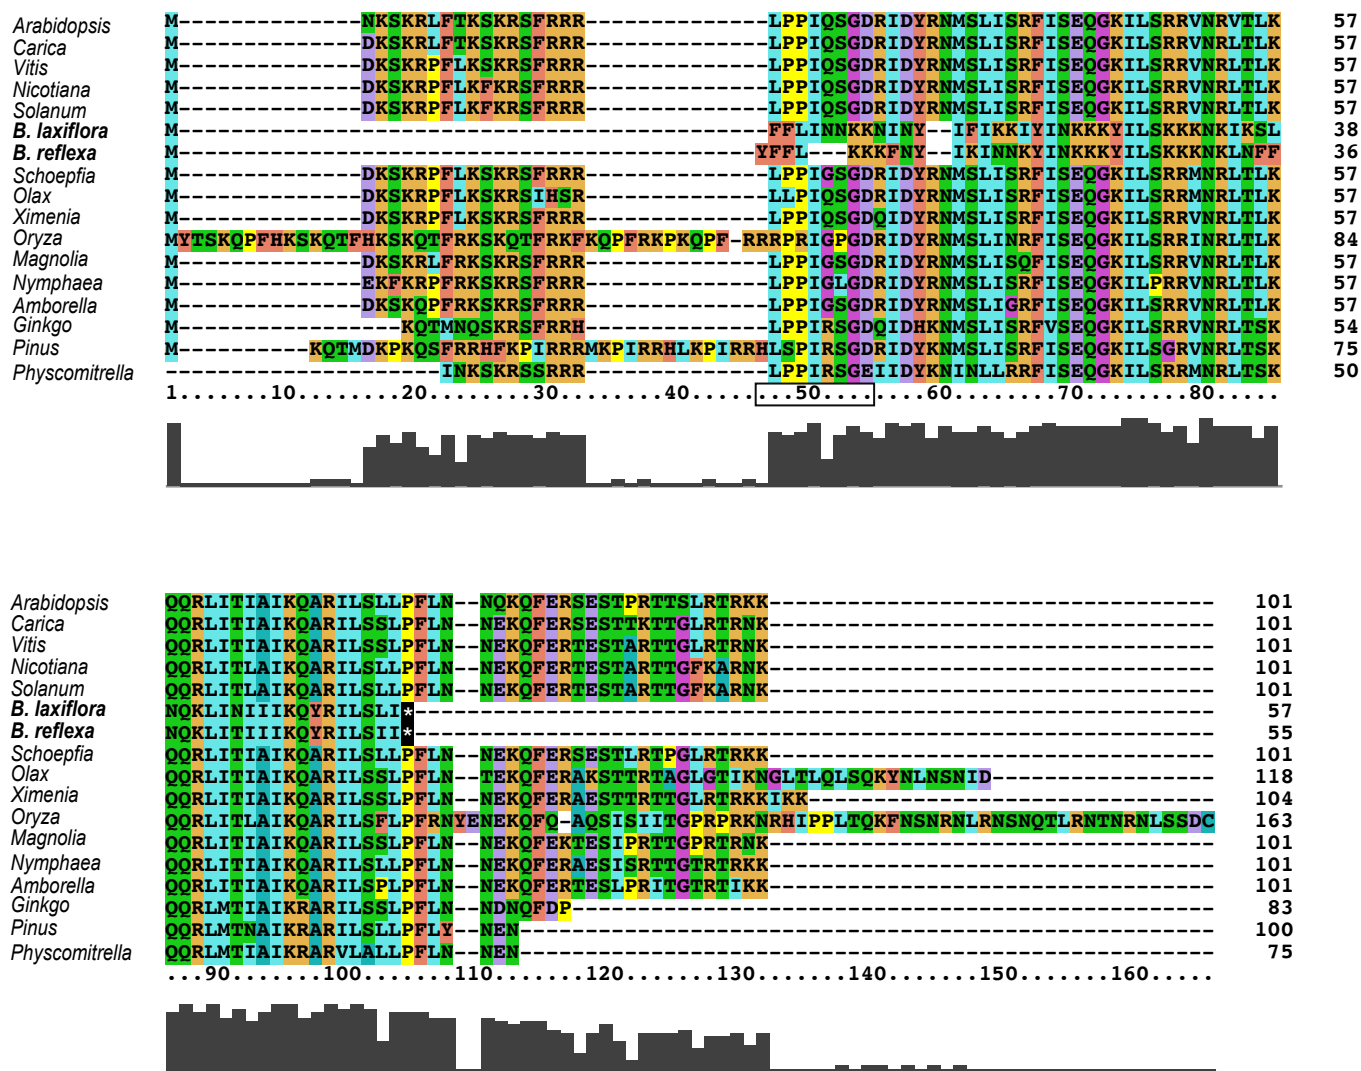

**Figure S4.** (cont.) Inferred amino acid alignments of the 15 protein genes present in *Balanophora* plastomes. Stop codons are shown only for *Balanophora* and are shaded in gray (TGA) or black (TAA). The arrows mark internal TAG codons present in one or both *Balanophora* species and inferred to encode W; note that most or all non-*Balanophora* and plants contain TGG (W in the standard genetic code) at most of these positions (Table 1). Regions of ambiguous alignment are marked with boxes and were excluded from the phylogenetic and molecular evolutionary rate analyses (open box, only the *Balanophora* sequences were excluded; gray box, the entire region was excluded). The histograms give the percentage of the aligned sequences that share the most common amino acid at each position.

# RPS19

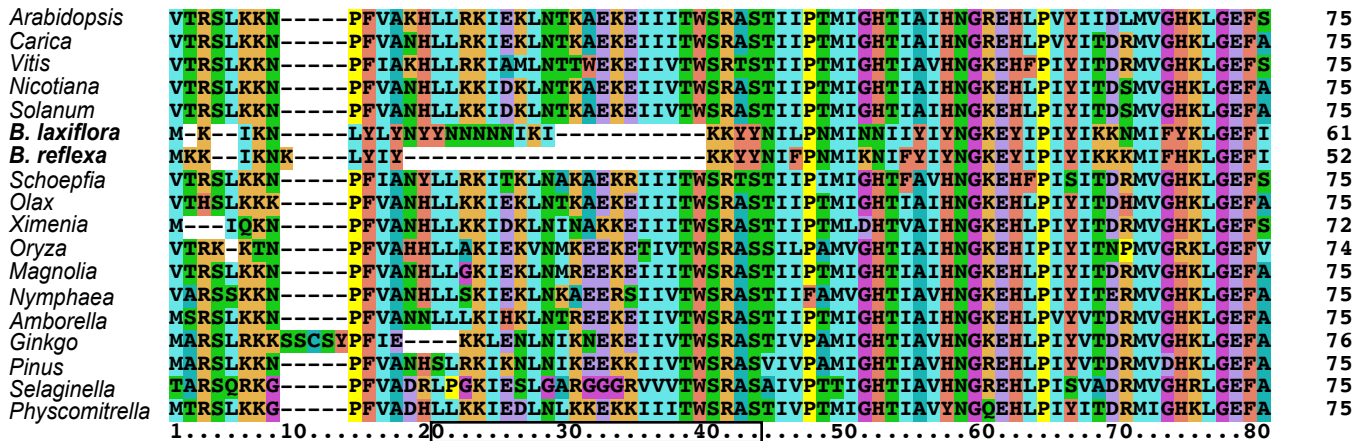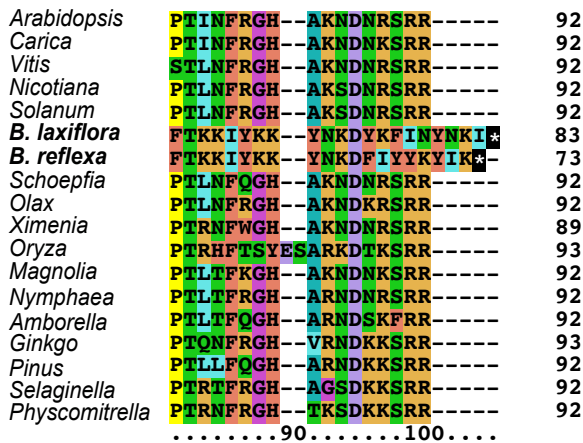

**Figure S4.** (cont.) Inferred amino acid alignments of the 15 protein genes present in *Balanophora* plastomes. Stop codons are shown only for *Balanophora* and are shaded in gray (TGA) or black (TAA). The arrows mark internal TAG codons present in one or both *Balanophora* species and inferred to encode W; note that most or all non-*Balanophora* and plants contain TGG (W in the standard genetic code) at most of these positions (Table 1). Regions of ambiguous alignment are marked with boxes and were excluded from the phylogenetic and molecular evolutionary rate analyses (open box, only the *Balanophora* sequences were excluded; gray box, the entire region was excluded). The histograms give the percentage of the aligned sequences that share the most common amino acid at each position.

# YCF1

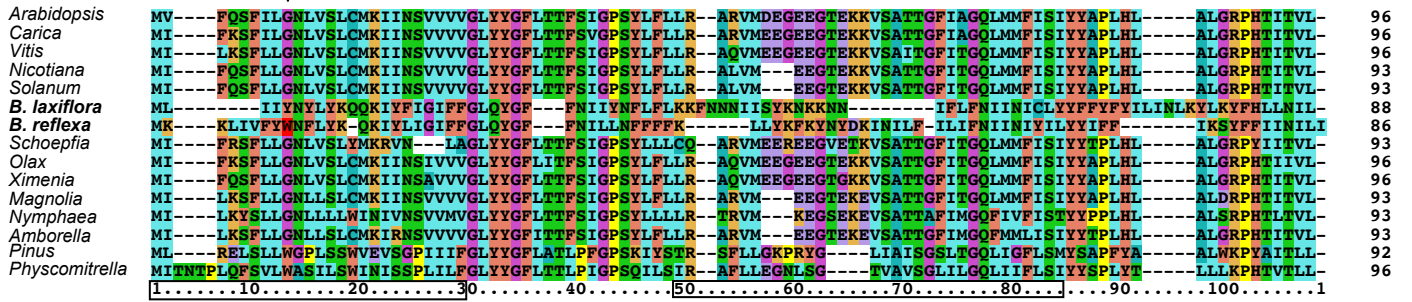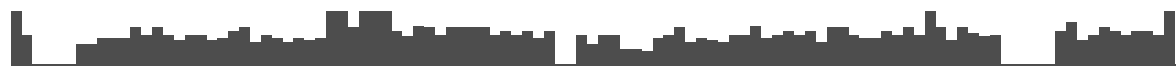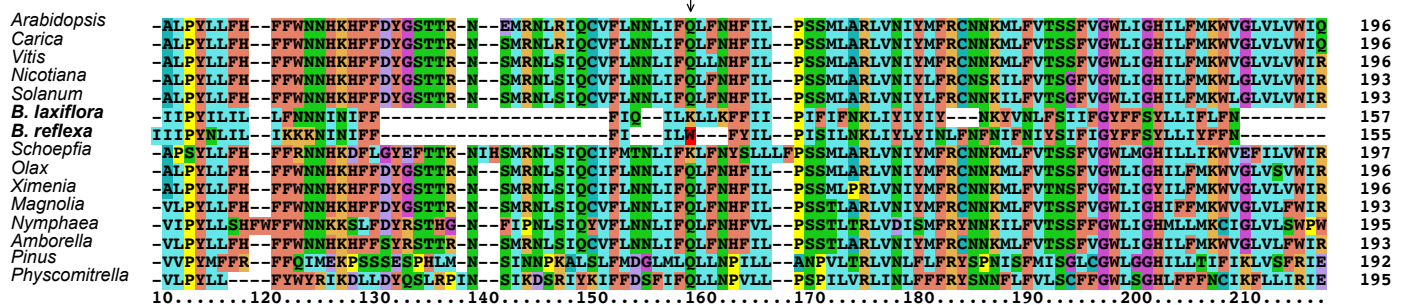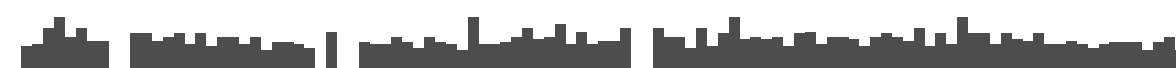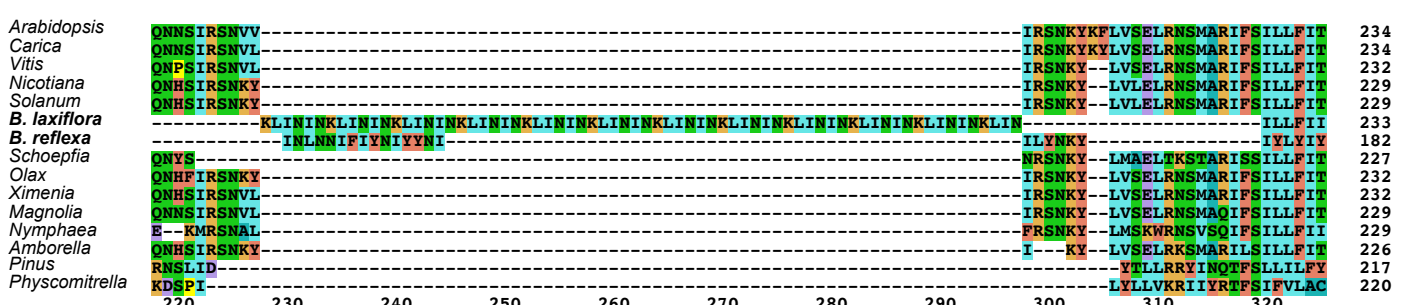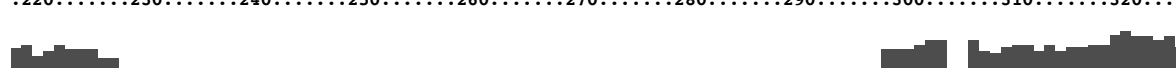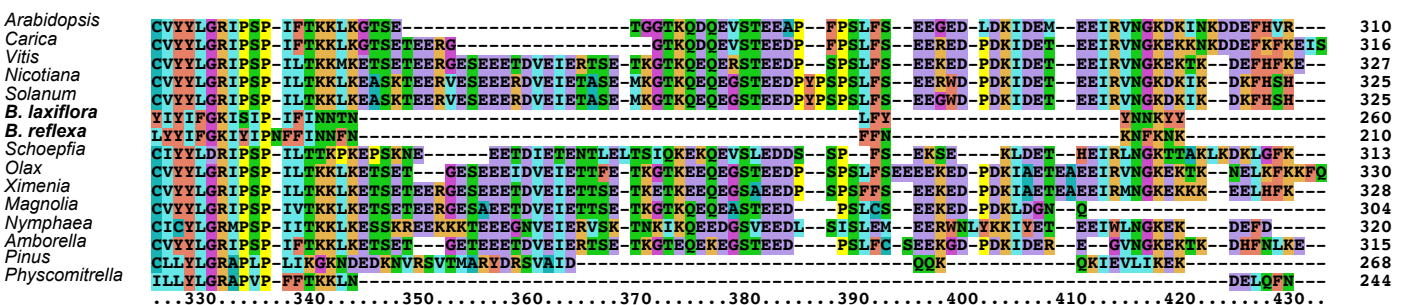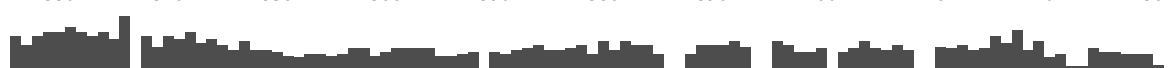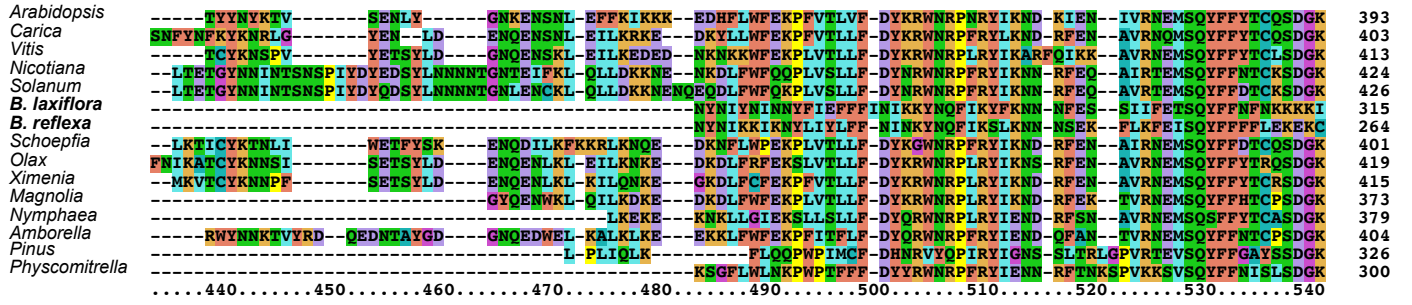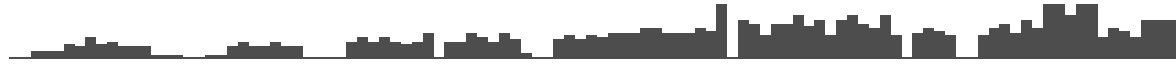

**Figure S4.** (cont.) Inferred amino acid alignments of the 15 protein genes present in *Balanophora* plastomes. Stop codons are shown only for *Balanophora* and are shaded in gray (TGA) or black (TAA). The arrows mark internal TAG codons present in one or both *Balanophora* species and inferred to encode W; note that most or all non-*Balanophora* land plants contain TGG (W in the standard genetic code) at most of these positions (Table 1). Regions of ambiguous alignment are marked with boxes and were excluded from the phylogenetic and molecular evolutionary rate analyses (open box, only the *Balanophora* sequences were excluded; gray box, the entire region was excluded). The histograms give the percentage of the aligned sequences that share the most common amino acid at each position.

# YCF1

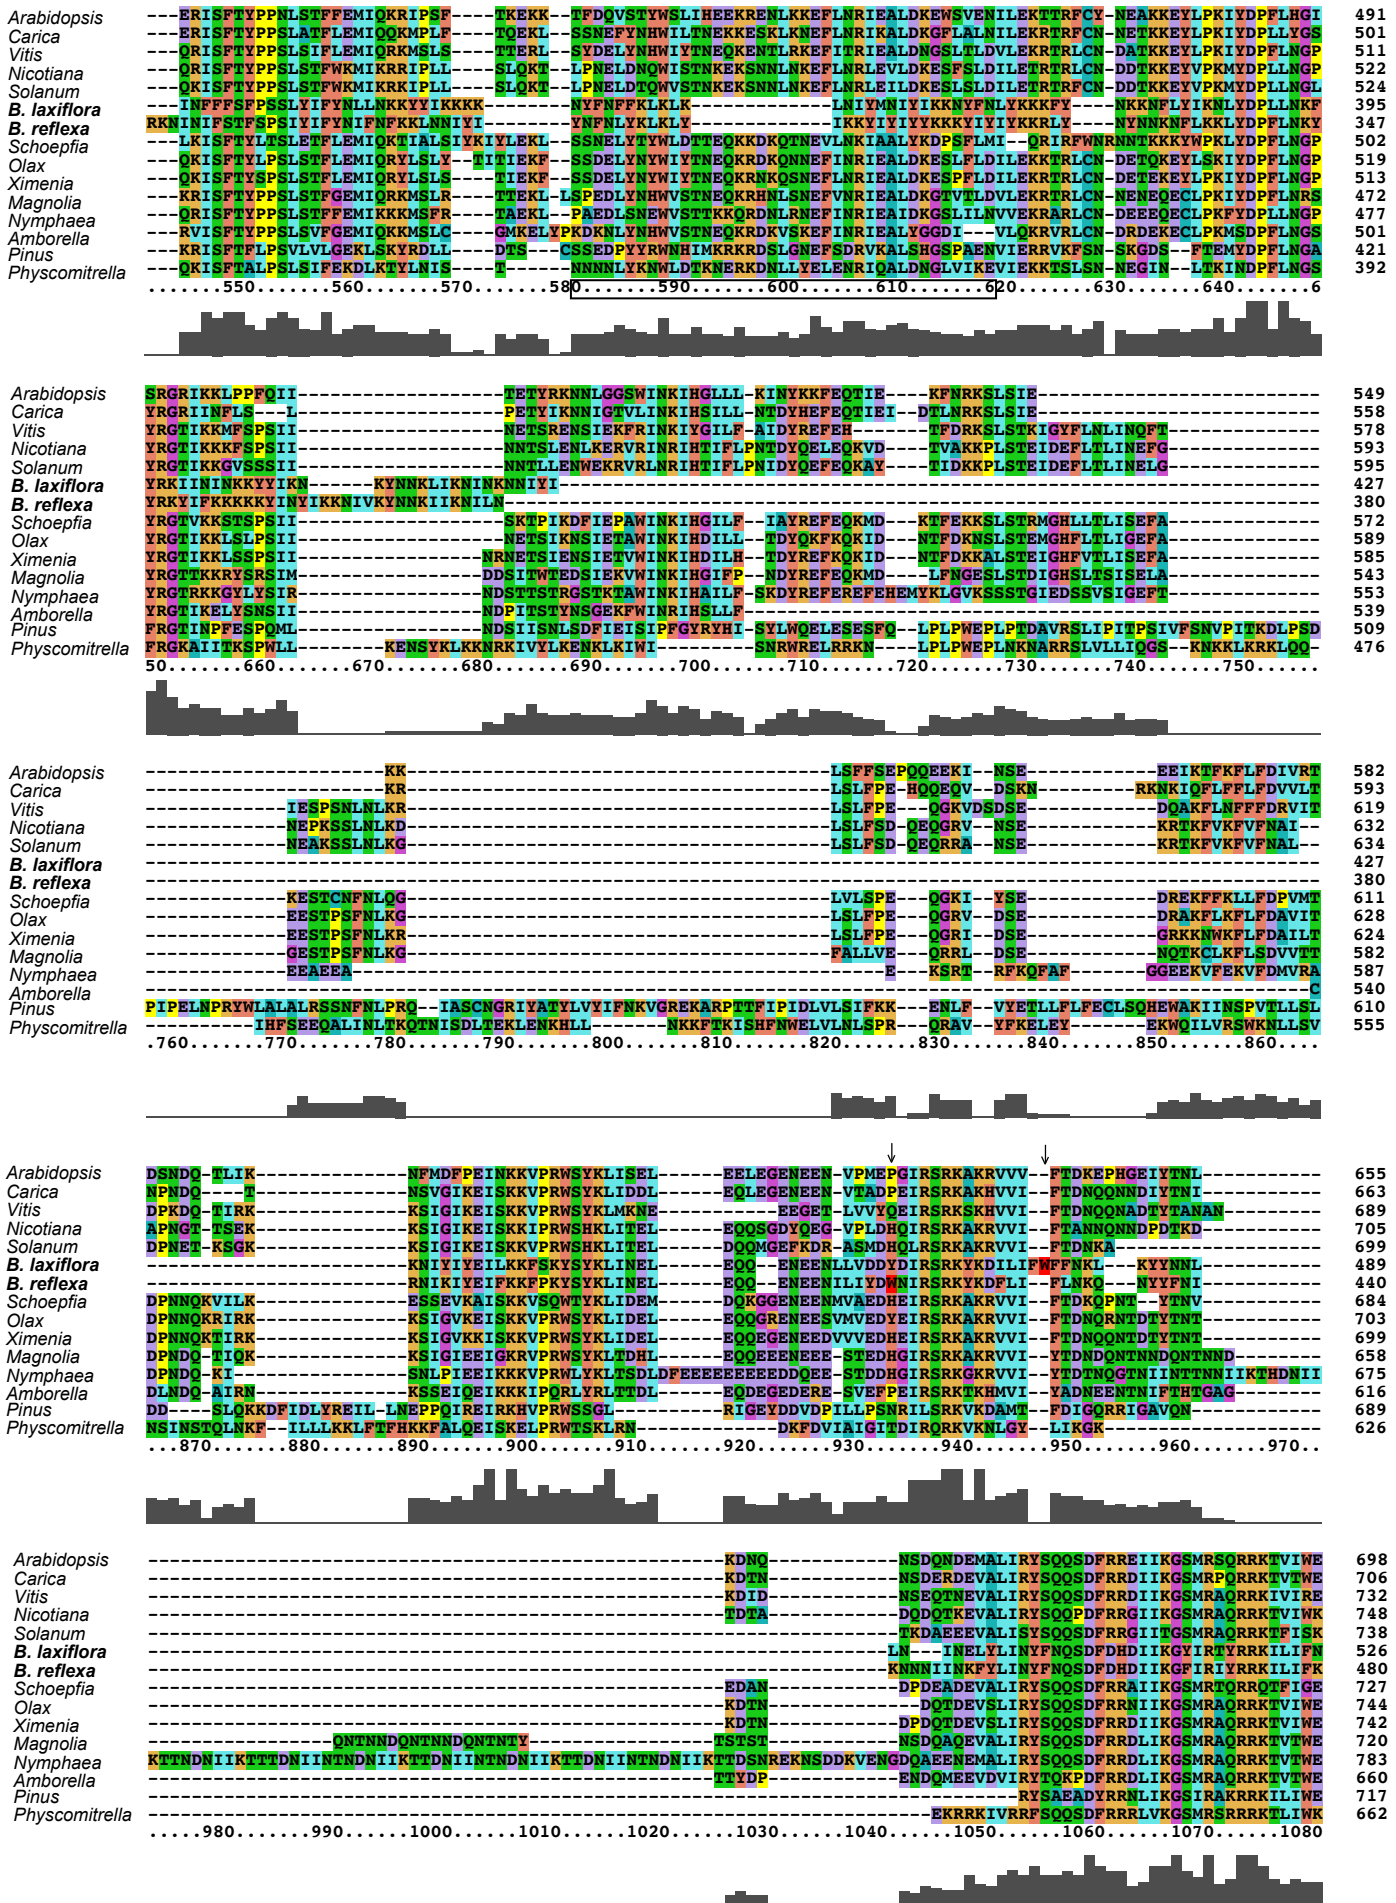

**Figure S4.** (cont.) Inferred amino acid alignments of the 15 protein genes present in *Balanophora* plastomes. Stop codons are shown only for *Balanophora* and are shaded in gray (TGA) or black (TAA). The arrows mark internal TAG codons present in one or both *Balanophora* species and inferred to encode W; note that most or all non-*Balanophora* land plants contain TGG (W in the standard genetic code) at most of these positions (Table 1). Regions of ambiguous alignment are marked with boxes and were excluded from the phylogenetic and molecular evolutionary rate analyses (open box, only the *Balanophora* sequences were excluded; gray box, the entire region was excluded). The histograms give the percentage of the aligned sequences that share the most common amino acid at each position.



# YCF1

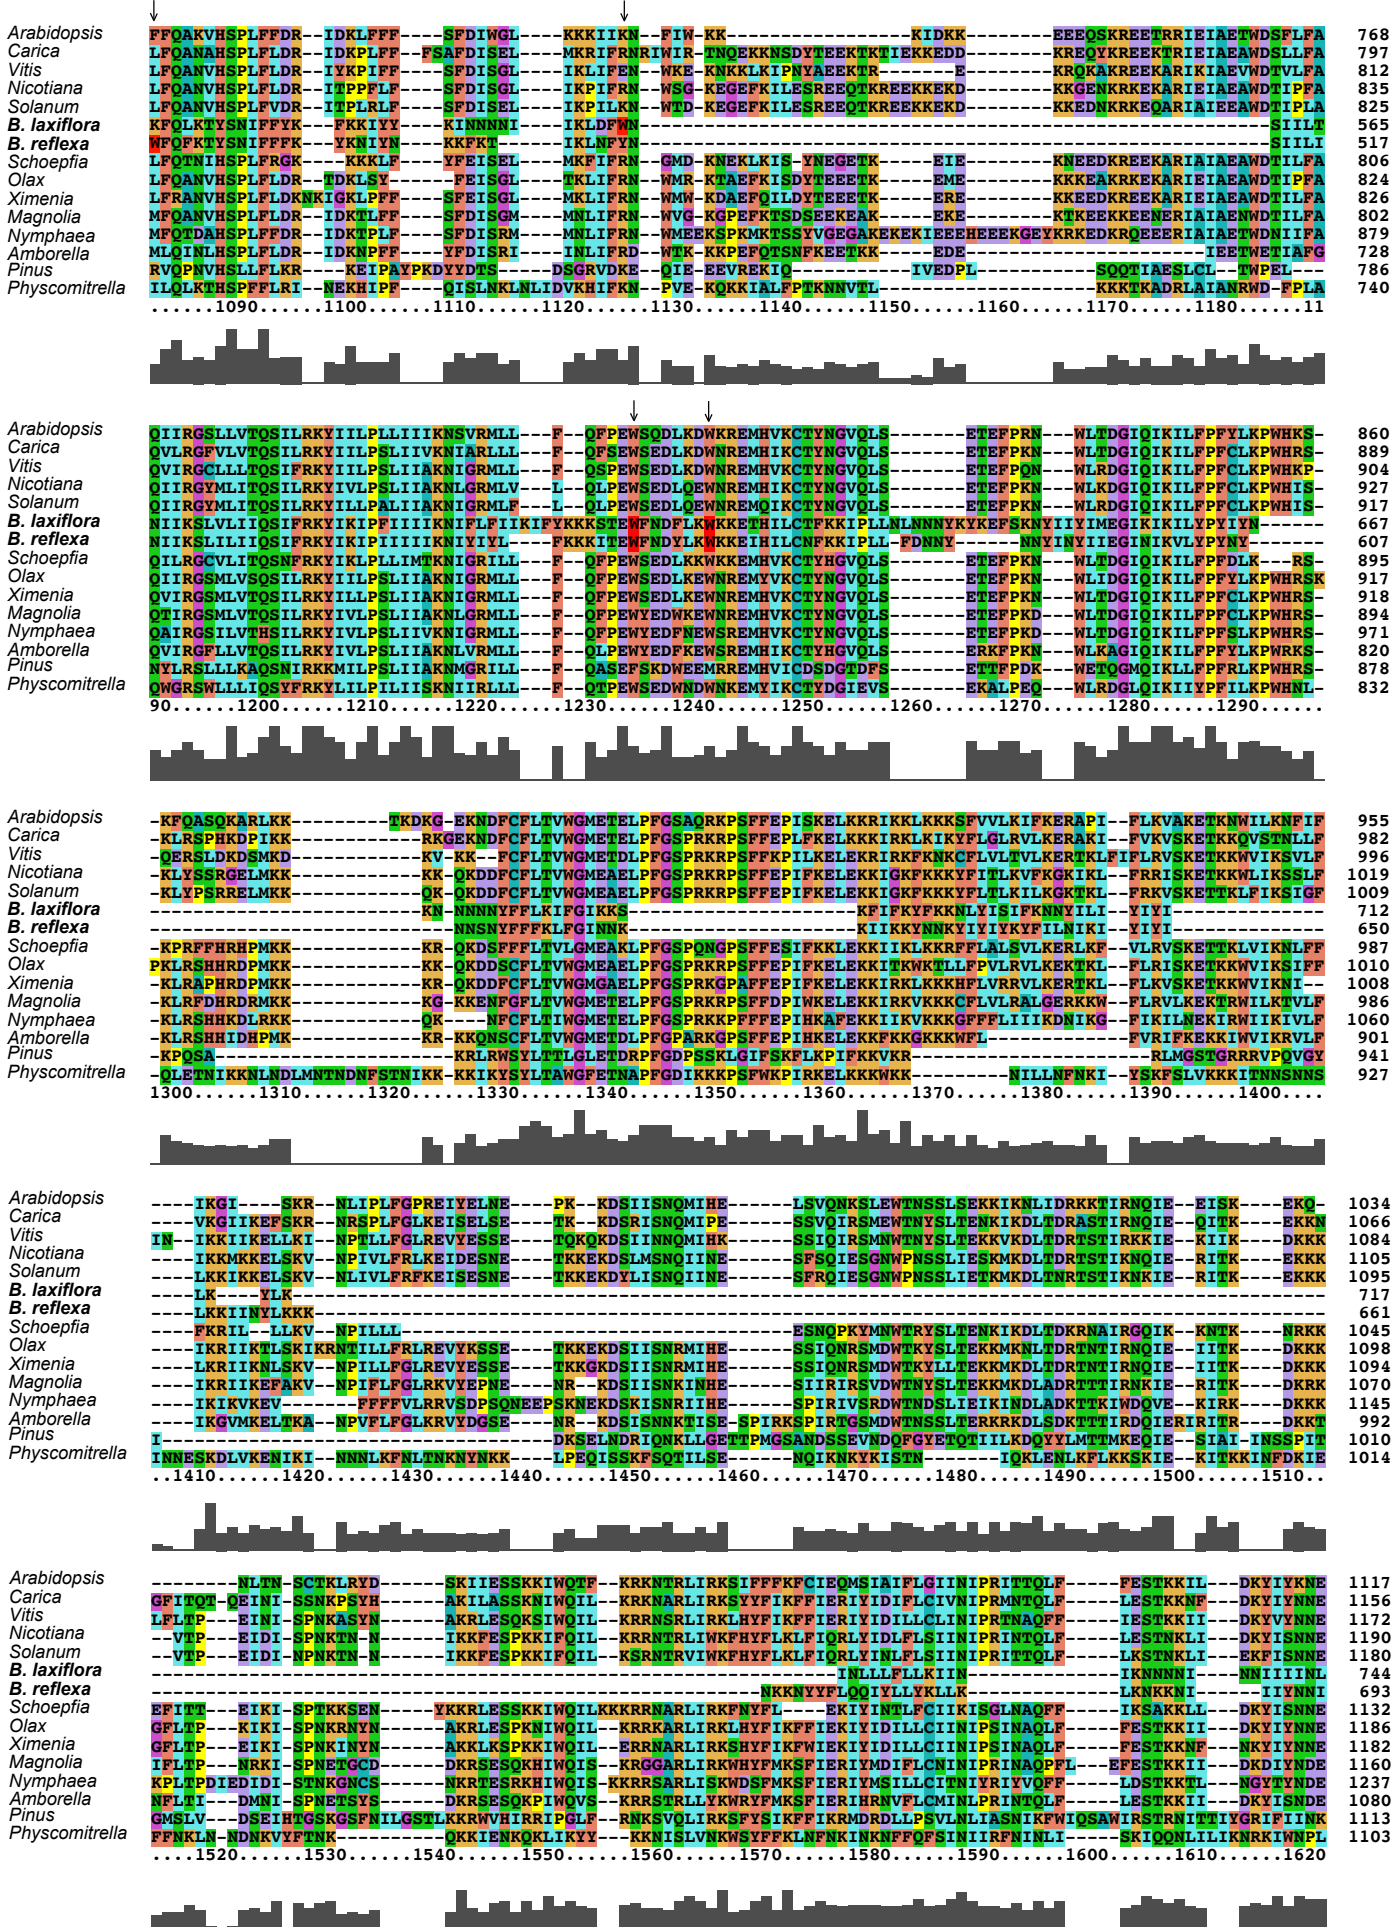

**Figure S4.** (cont.) Inferred amino acid alignments of the 15 protein genes present in *Balanophora* plastomes. Stop codons are shown only for *Balanophora* and are shaded in gray (TGA) or black (TAA). The arrows mark internal TAG codons present in one or both *Balanophora* species and inferred to encode W; note that most or all non-*Balanophora* land plants contain TGG (W in the standard genetic code) at most of these positions (Table 1). Regions of ambiguous alignment are marked with boxes and were excluded from the phylogenetic and molecular evolutionary rate analyses (open box, only the *Balanophora* sequences were excluded; gray box, the entire region was excluded). The histograms show the percentage of the aligned sequences that share the most common amino acid at each position.

# YCF1

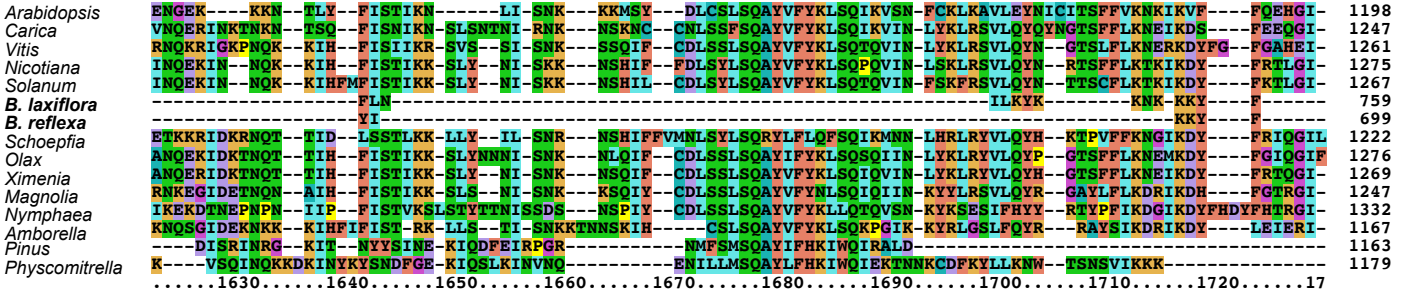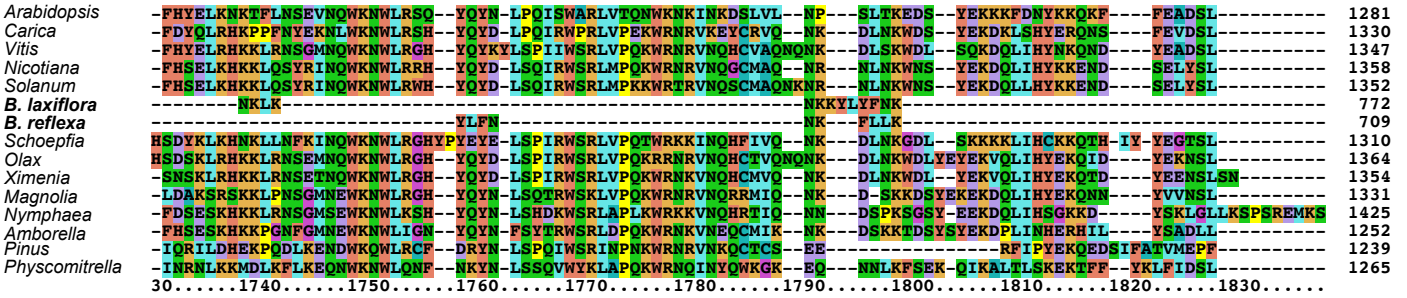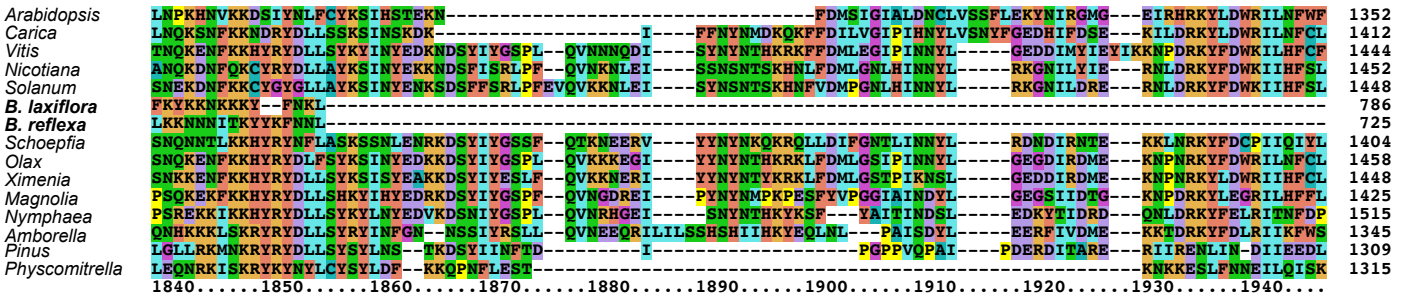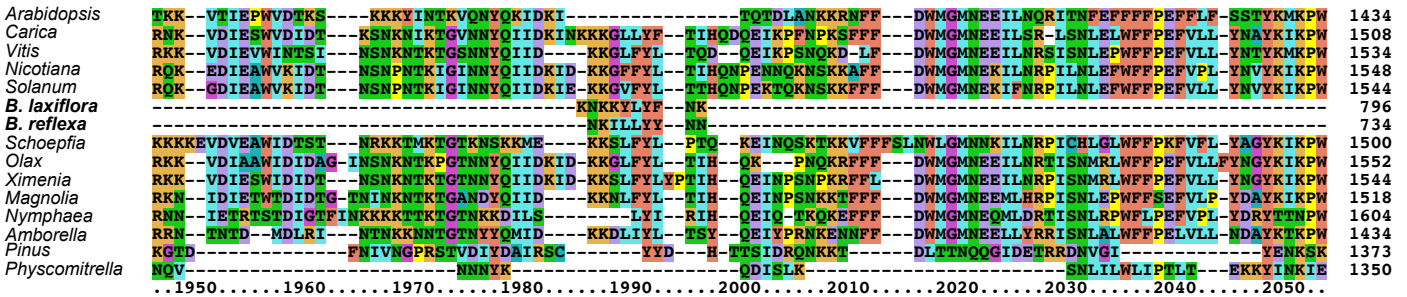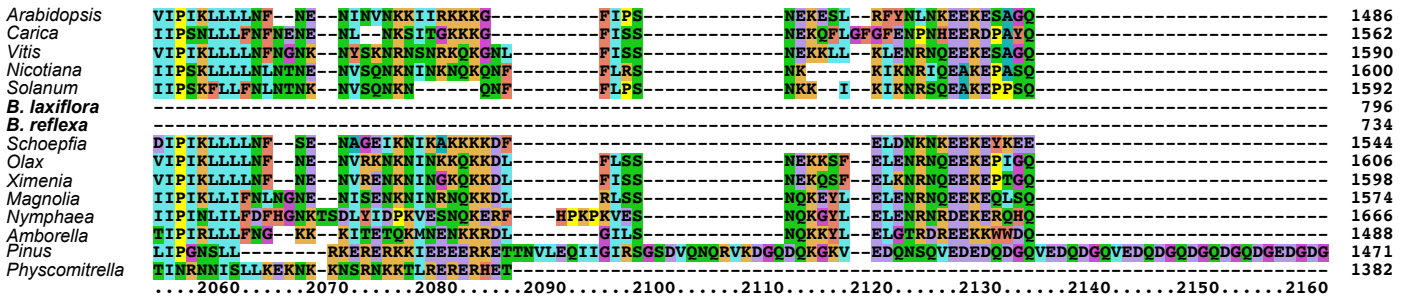

**Figure S4.** (cont.) Inferred amino acid alignments of the 15 protein genes present in *Balanophora* plastomes. Stop codons are shown only for *Balanophora* and are shaded in gray (TGA) or black (TAA). The arrows mark internal TAG codons present in one or both *Balanophora* species and inferred to encode W; note that most or all non-*Balanophora* land plants contain TGG (W in the standard genetic code) at most of these positions (Table 1). Regions of ambiguous alignment are marked with boxes and were excluded from the phylogenetic and molecular evolutionary rate analyses (open box, only the *Balanophora* sequences were excluded; gray box, the entire region was excluded). The histograms give the percentage of the aligned sequences that share the most common amino acid at each position.

# YCF1

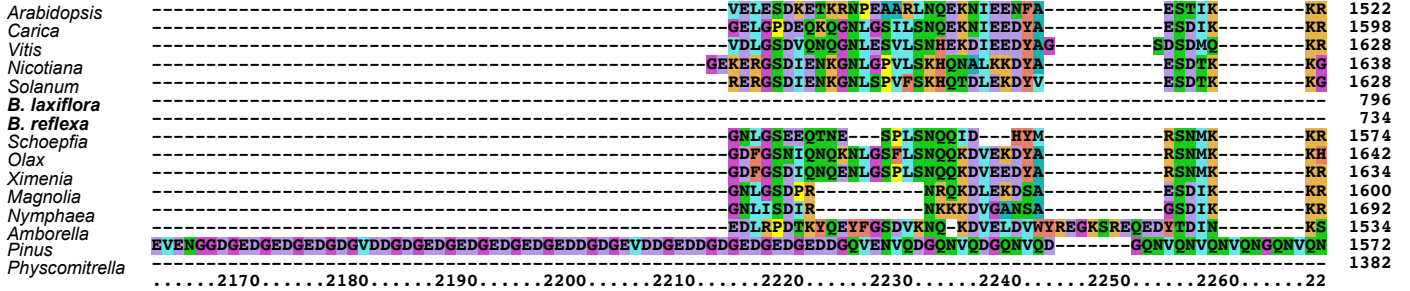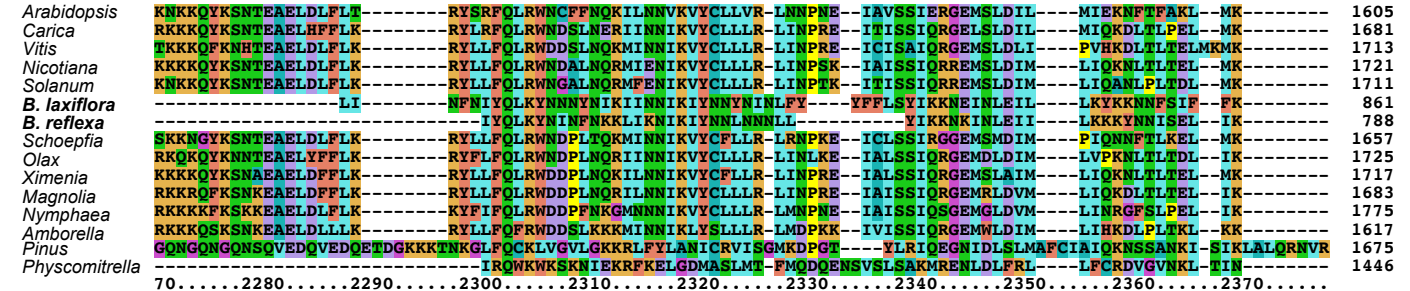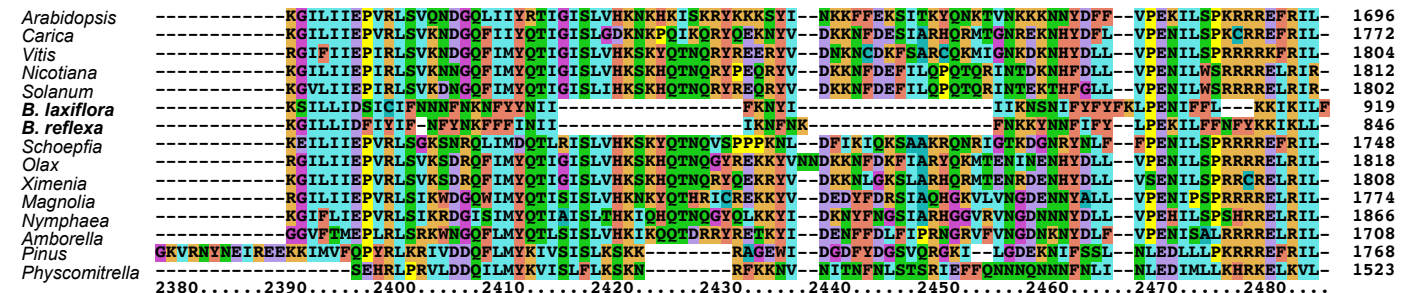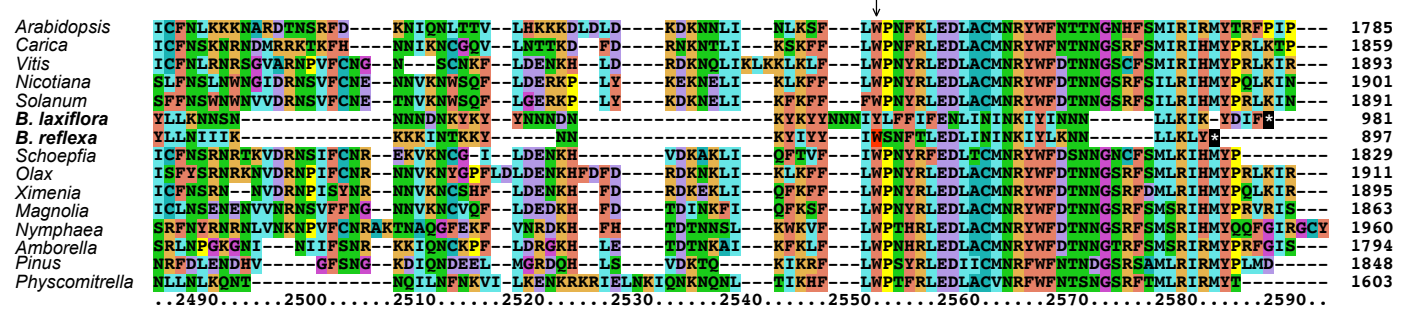

|                     |      |
|---------------------|------|
| Arabidopsis         | 1785 |
| Carica              | 1859 |
| Vitis               | 1893 |
| Nicotiana           | 1901 |
| Solanum             | 1891 |
| <b>B. laxiflora</b> | 981  |
| <b>B. reflexa</b>   | 897  |
| Schoepfia           | 1829 |
| Olax                | 1911 |
| Ximenia             | 1895 |
| Magnolia            | 1863 |
| Nymphaea            | 1976 |
| Amborella           | 1794 |
| Pinus               | 1848 |
| Physcomitrella      | 1603 |
| .....2600.....      |      |

**Figure S4.** (cont.) Inferred amino acid alignments of the 15 protein genes present in *Balanophora* plastomes. Stop codons are shown only for *Balanophora* and are shaded in gray (TGA) or black (TAA). The arrows mark internal TAG codons present in one or both *Balanophora* species and inferred to encode W; note that most or all non-*Balanophora* land plants contain TGG (W in the standard genetic code) at most of these positions (Table 1). Regions of ambiguous alignment are marked with boxes and were excluded from the phylogenetic and molecular evolutionary rate analyses (open box, only the *Balanophora* sequences were excluded; gray box, the entire region was excluded). The histograms give the percentage of the aligned sequences that share the most common amino acid at each position.



# YCF2

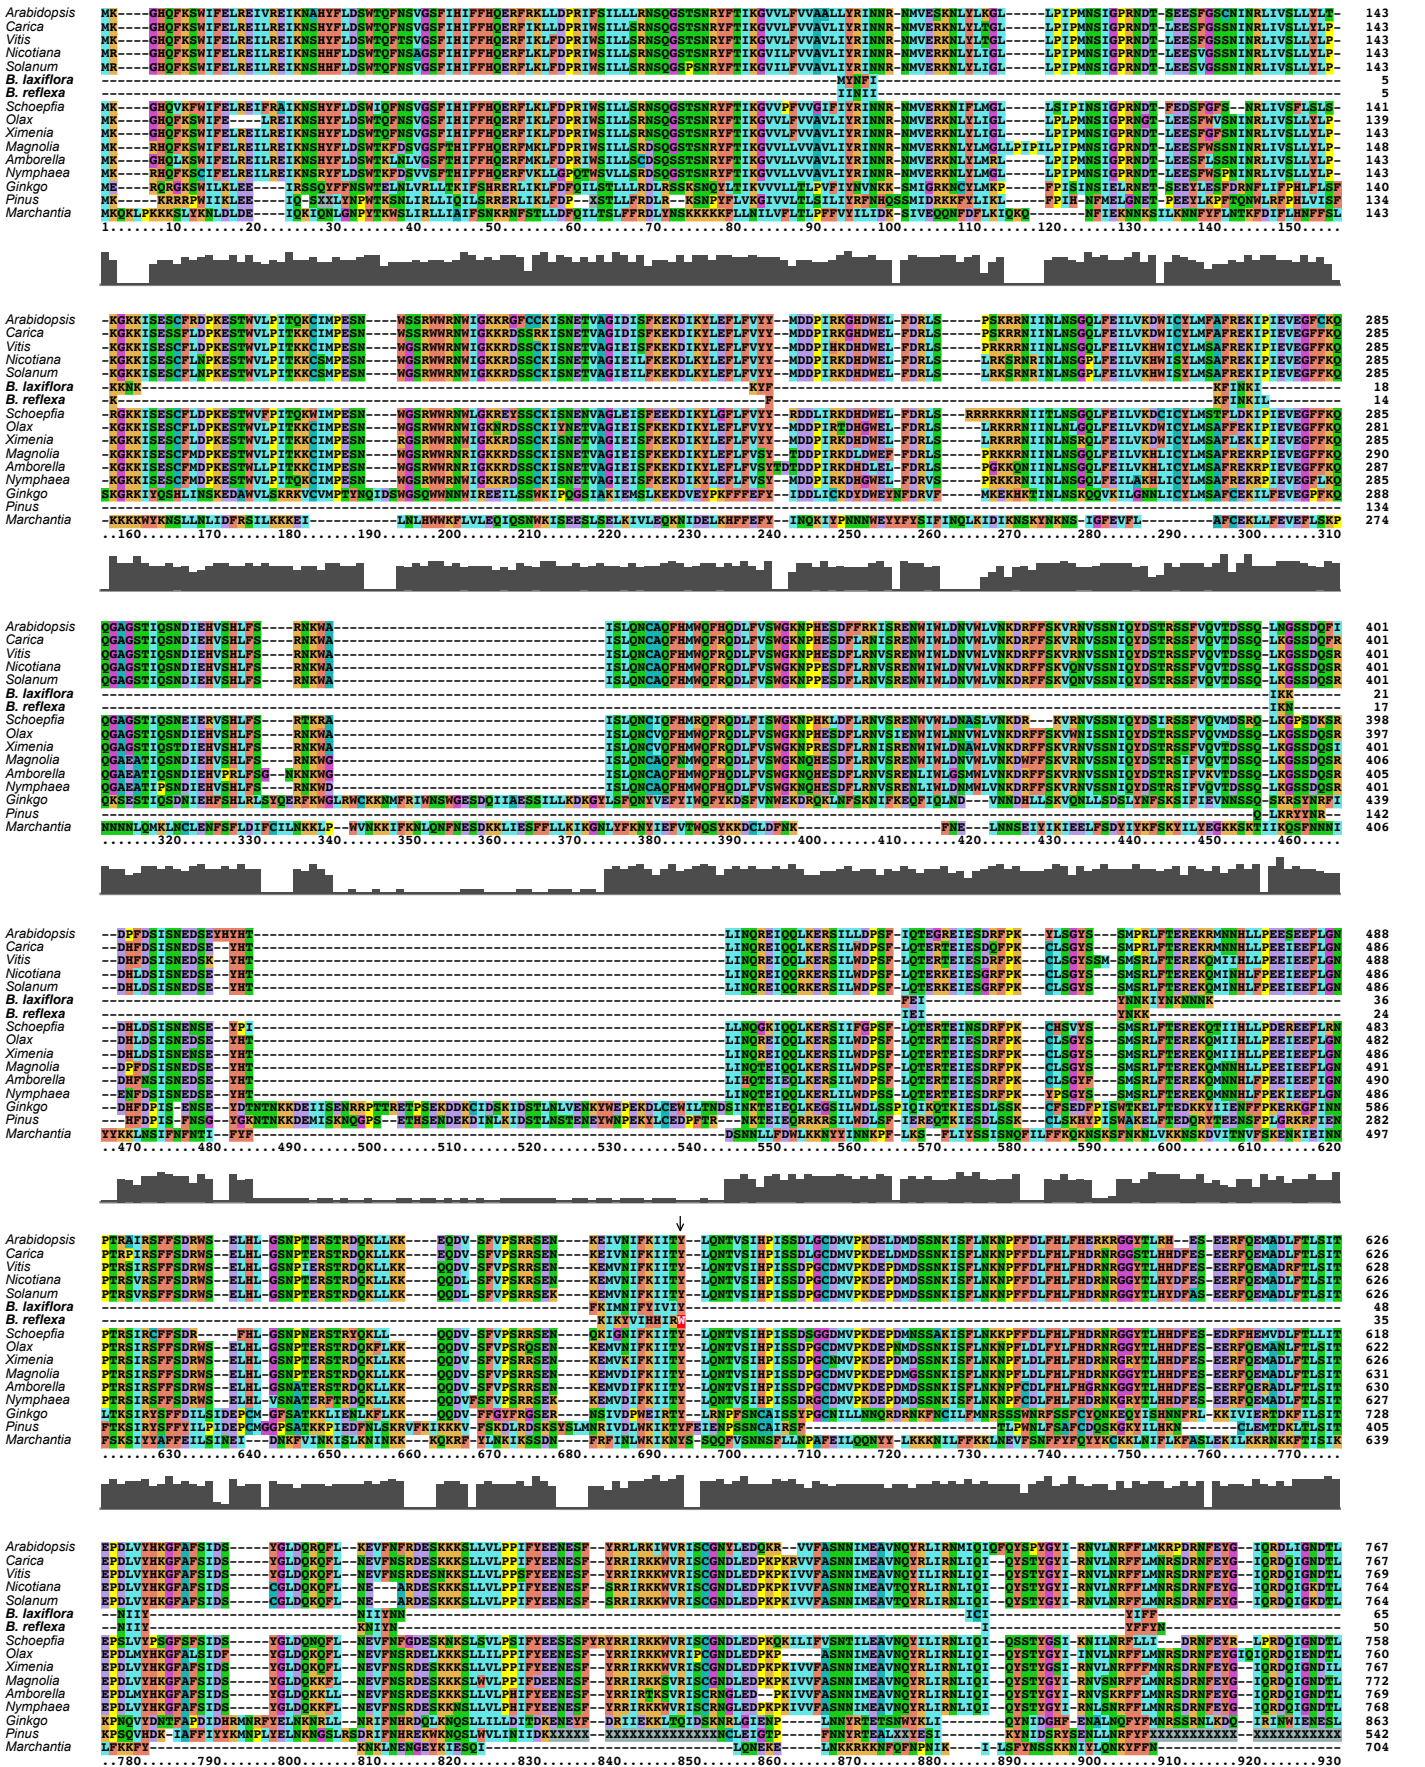

**Figure S4.** (cont.) Amino acid alignments of the 15 protein genes present in *Balanophora* plastomes. Stop codons are shown only for *Balanophora* and are shaded in black to represent TAA. The arrow marks the internal TAG codon present in *B. reflexa* and inferred to encode W. Blue lines mark the three motifs identified in 1994 by Wolfe (3) as conserved between YCF2 and the CDC48 family of ATPases (*SI Appendix*, Results). The histograms give the percentage of the aligned sequences that share the most common amino acid at each position.



# YCF2

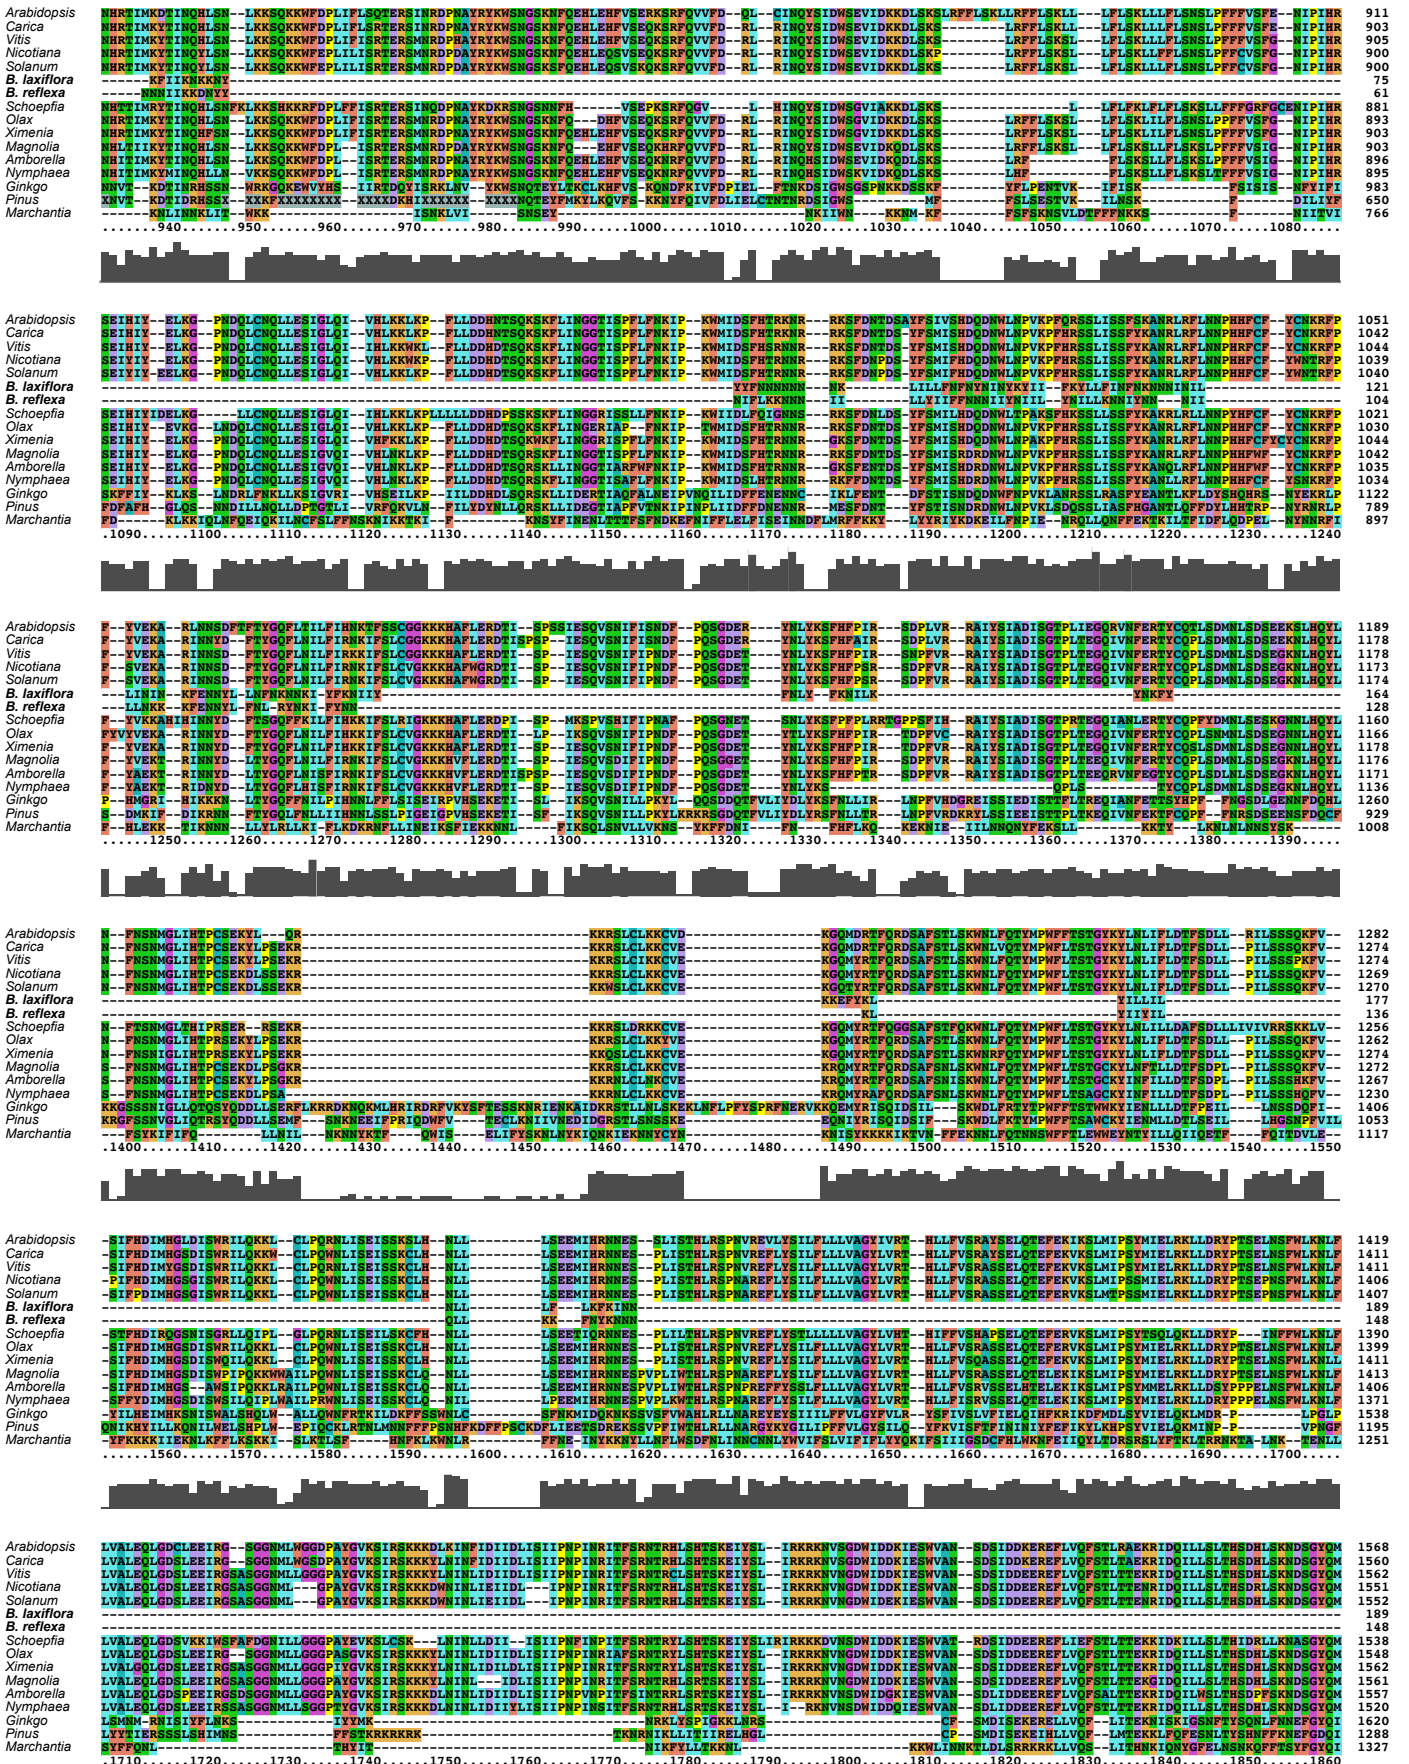

**Figure S4.** (cont.) Inferred amino acid alignments of the 15 protein genes present in *Balanophora* plastomes. Stop codons are shown only for *Balanophora* and are shaded in black to represent TAA. The arrow marks the internal TAG codon present in *B. reflexa* and inferred to encode W. Blue lines mark the three motifs identified in 1994 by Wolfe (3) as conserved between YCF2 and the CDC48 family of ATPases (*SI Appendix*, Results). The histograms give the percentage of the aligned sequences that share the most common amino acid at each position.

# YCF2

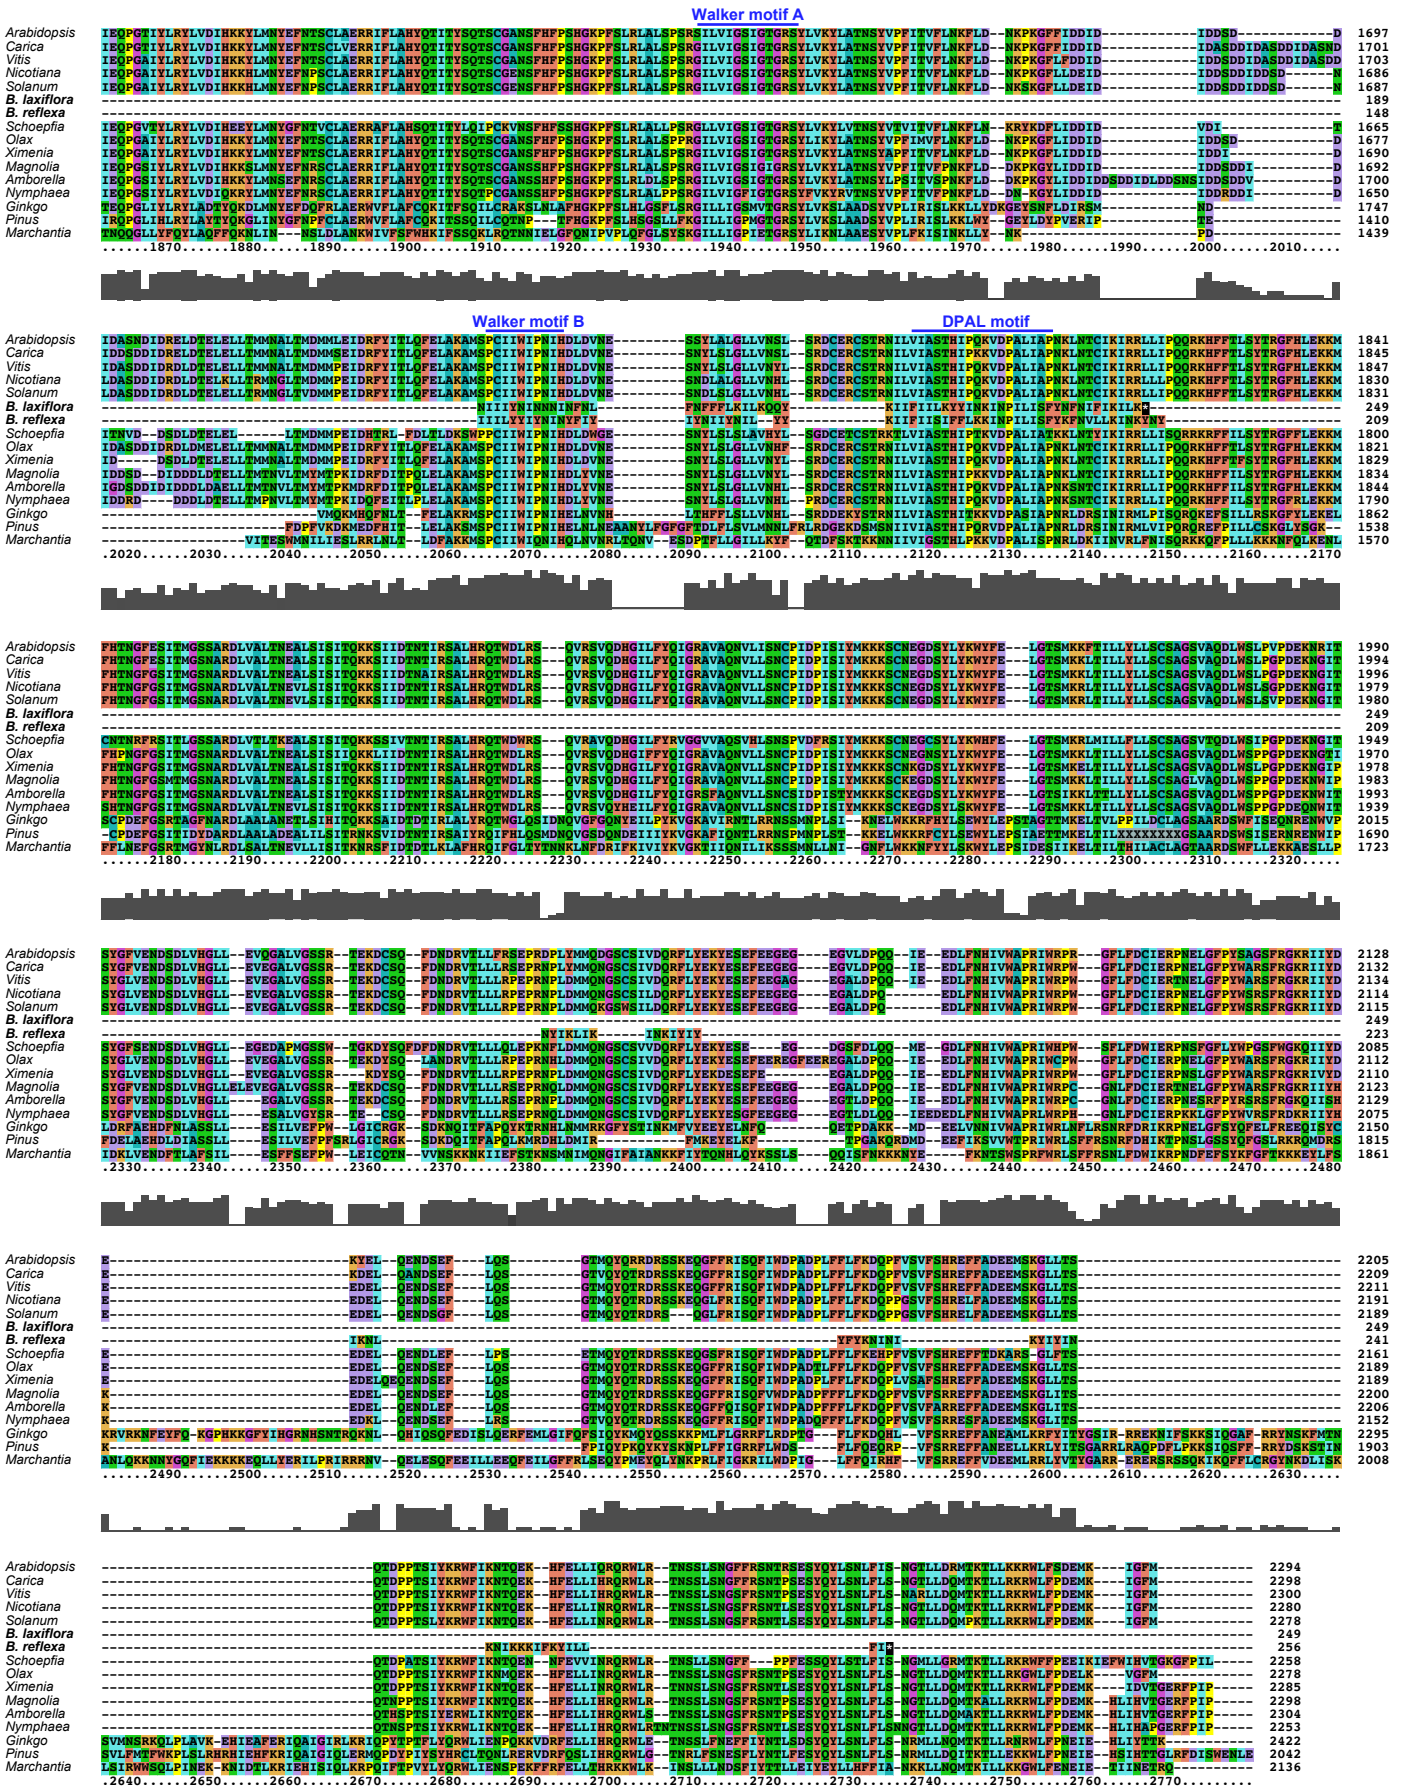

**Figure S4.** (cont.) Inferred amino acid alignments of the 15 protein genes present in *Balanophora* plastomes. Stop codons are shown only for *Balanophora* and are shaded in black to represent TAA. The arrow marks the internal TAG codon present in *B. reflexa* and inferred to encode W. Blue lines mark the three motifs identified in 1994 by Wolfe (3) as conserved between YCF2 and the CDC48 family of ATPases (*SI Appendix*, Results). The histograms give the percentage of the aligned sequences that share the most common amino acid at each position.

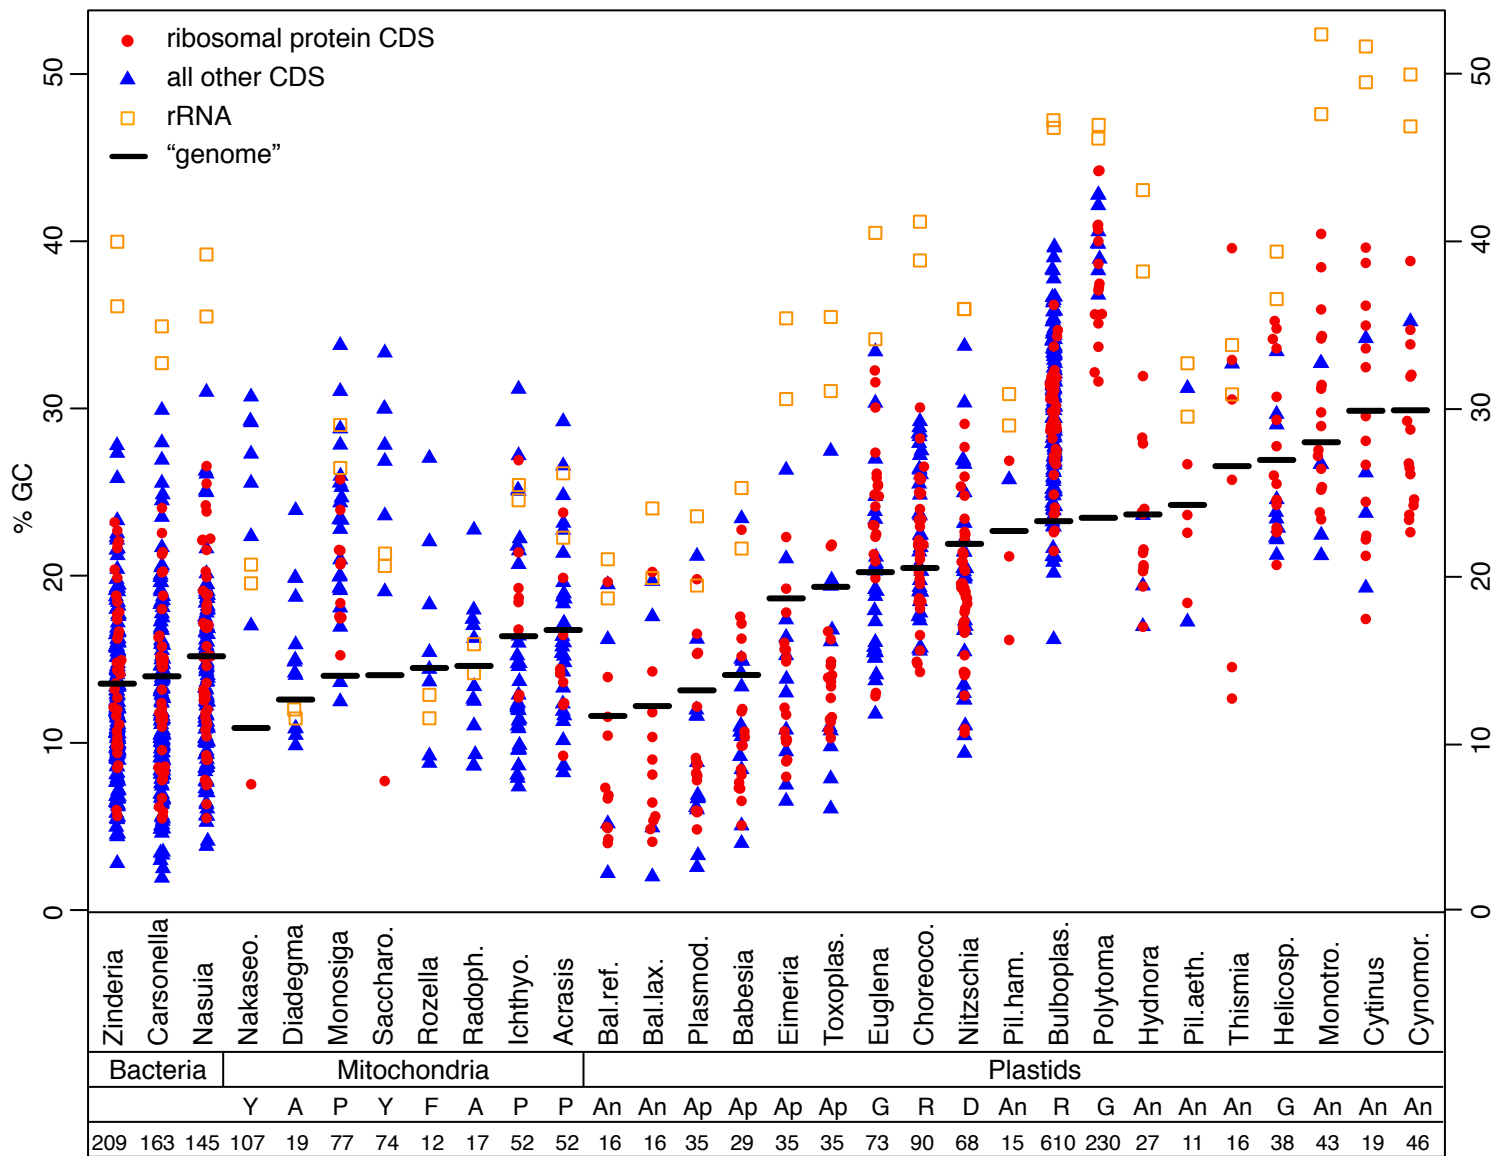

**Figure S5.** GC content of genes in 30 AT-rich bacterial and organellar genomes. All genes were analyzed except for tRNA, 5S rRNA, and 4.5S rRNA genes. The "genome" GC values include only one copy of the large, usually perfect repeats present in many plastomes, as these almost always contain rRNA genes, whose relative GC-richness will bias the full-genome GC values, especially for highly reduced genomes. Numbers at bottom are "genome" sizes in kb. Abbreviations: Y, yeast; A, animal; P, protist; F, fungus; An, angiosperm; Ap, apicomplexan; R, red alga; D, diatom; G, green alga or green-algal-derived. For full species names, see *SI Appendix Table S12*.



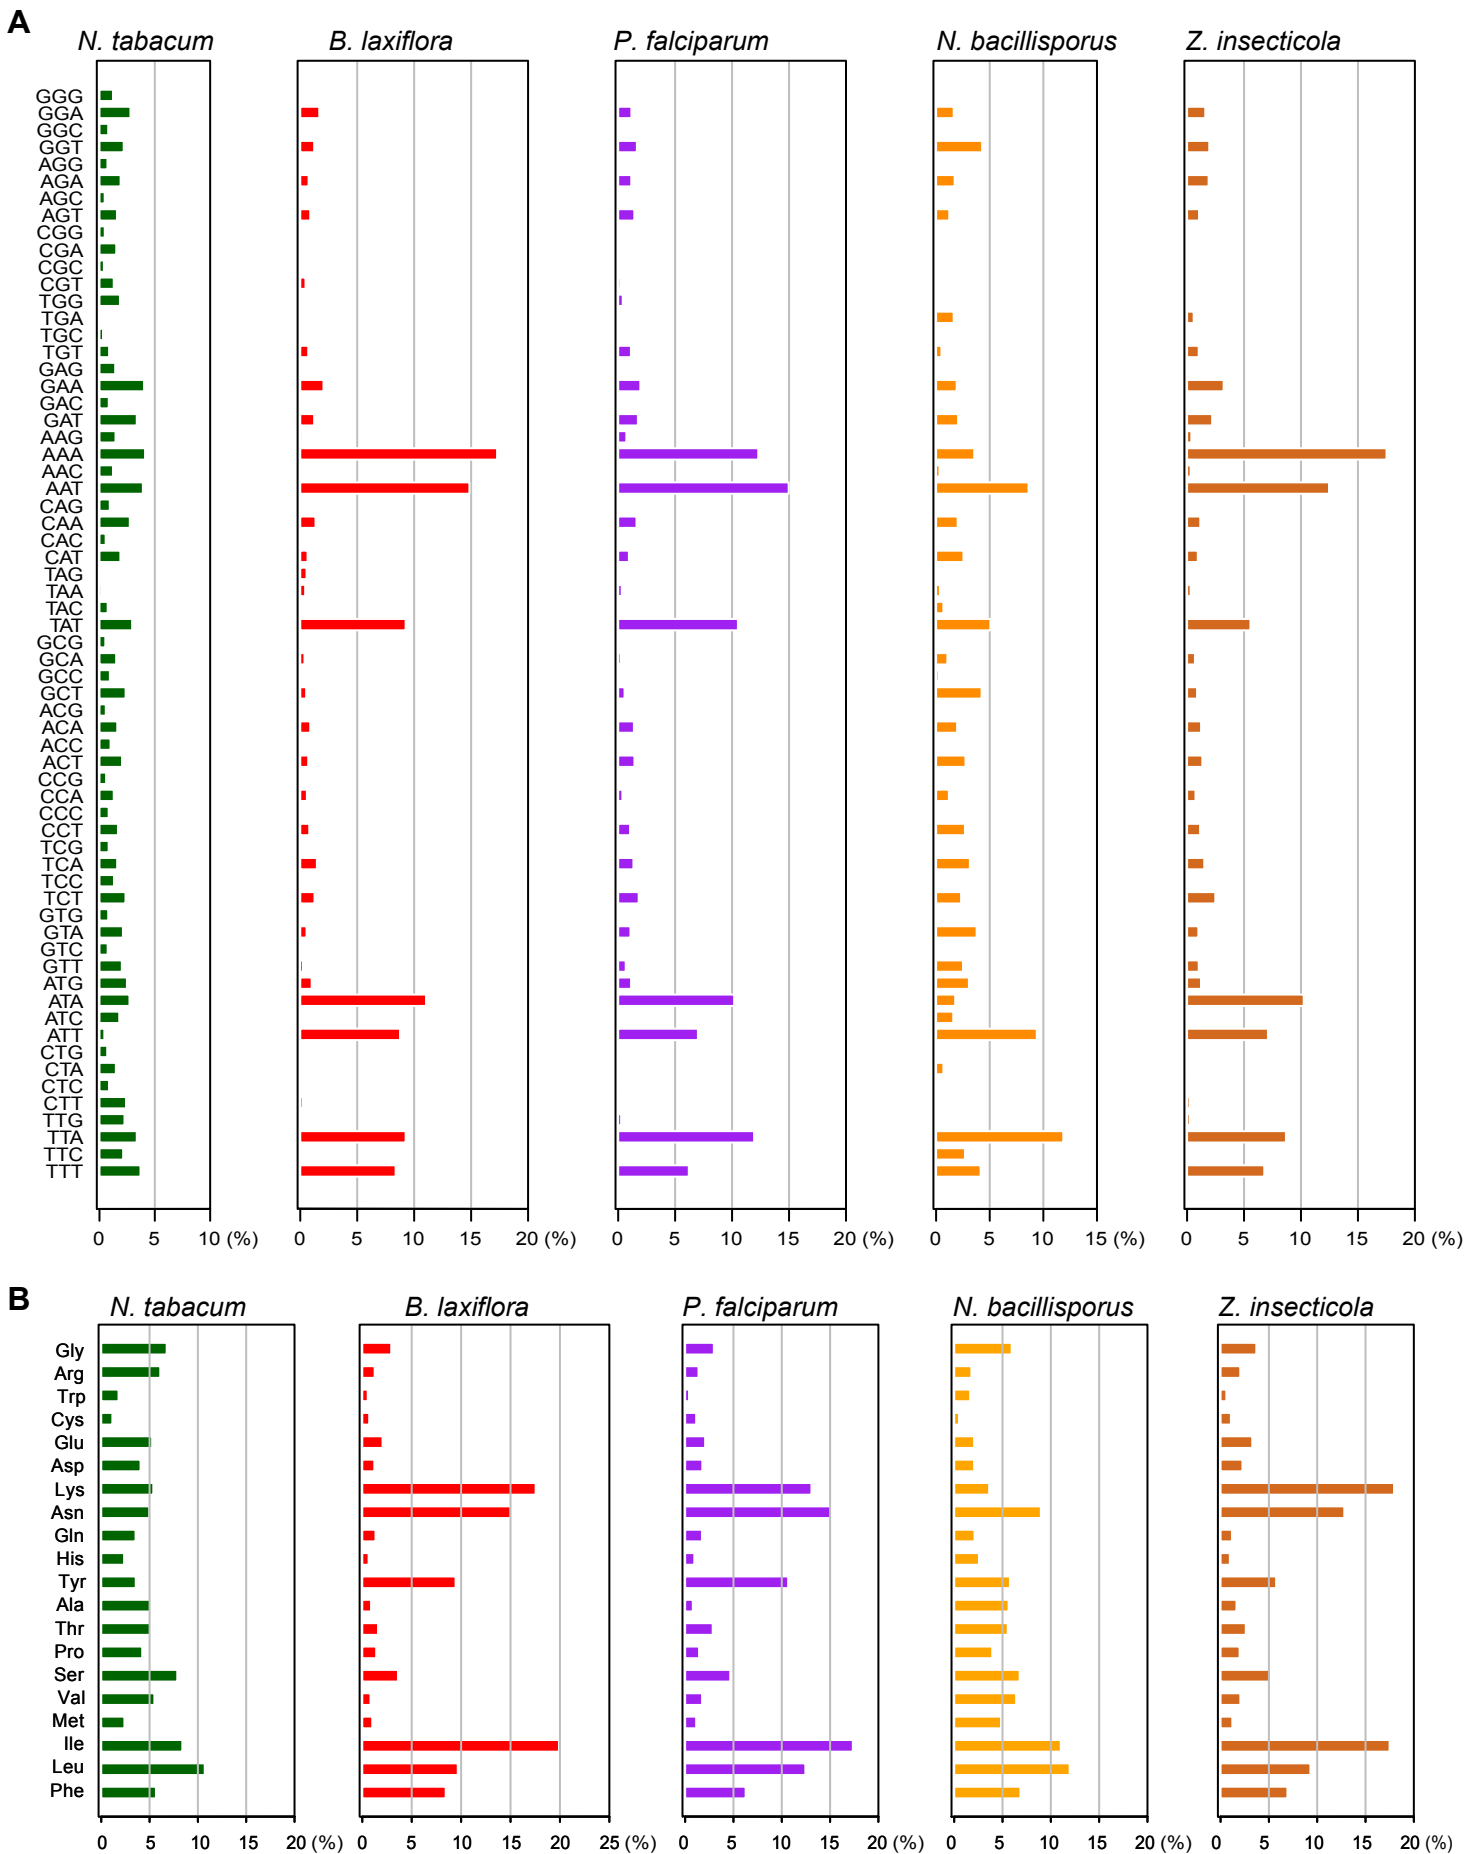

**A** *B. fungosa* nuclear genes  
(n = 61, GC = 45.2%)

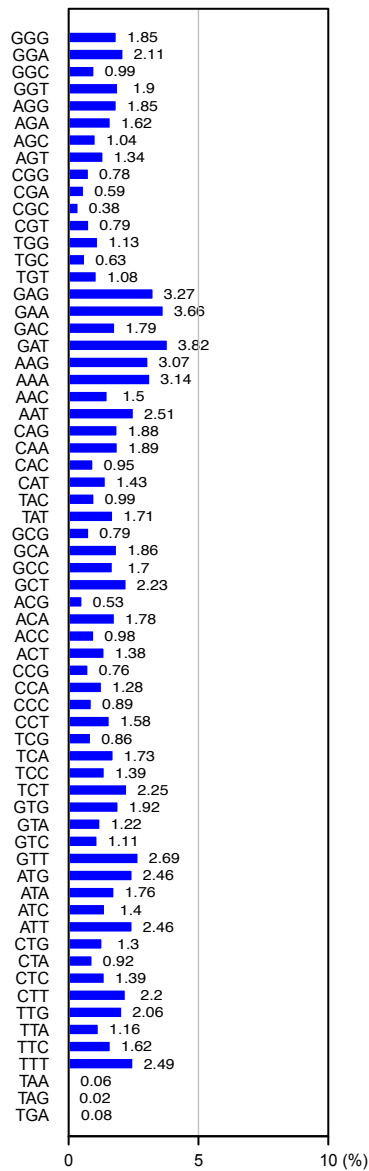

**B** *B. laxiflora* mitochondrial genes  
(n = 10, GC = 36.5%)

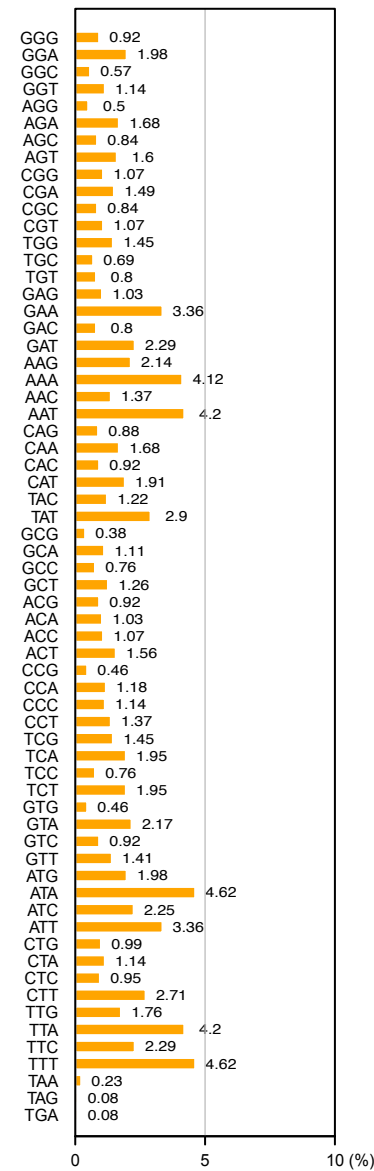

**C** *B. laxiflora* plastid genes  
(n = 15, GC = 8.9%)

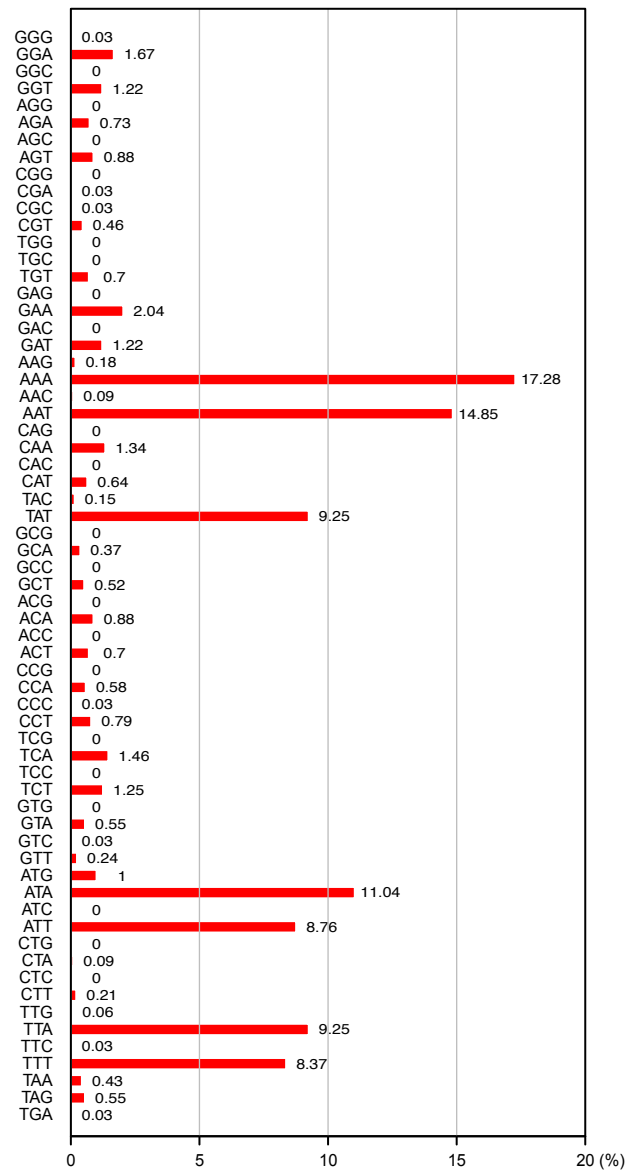

**Figure S8.** Comparison of codon usage in the *Balanophora* nuclear (A), mitochondrial (B), and plastid (C) genomes. Percent usage frequency is shown by the bars. See *SI Materials and Methods* for GenBank accession numbers for the mitochondrial and nuclear genes. Note that TAG is used as a Trp codon rather than a stop codon in the *B. laxiflora* plastid genes.

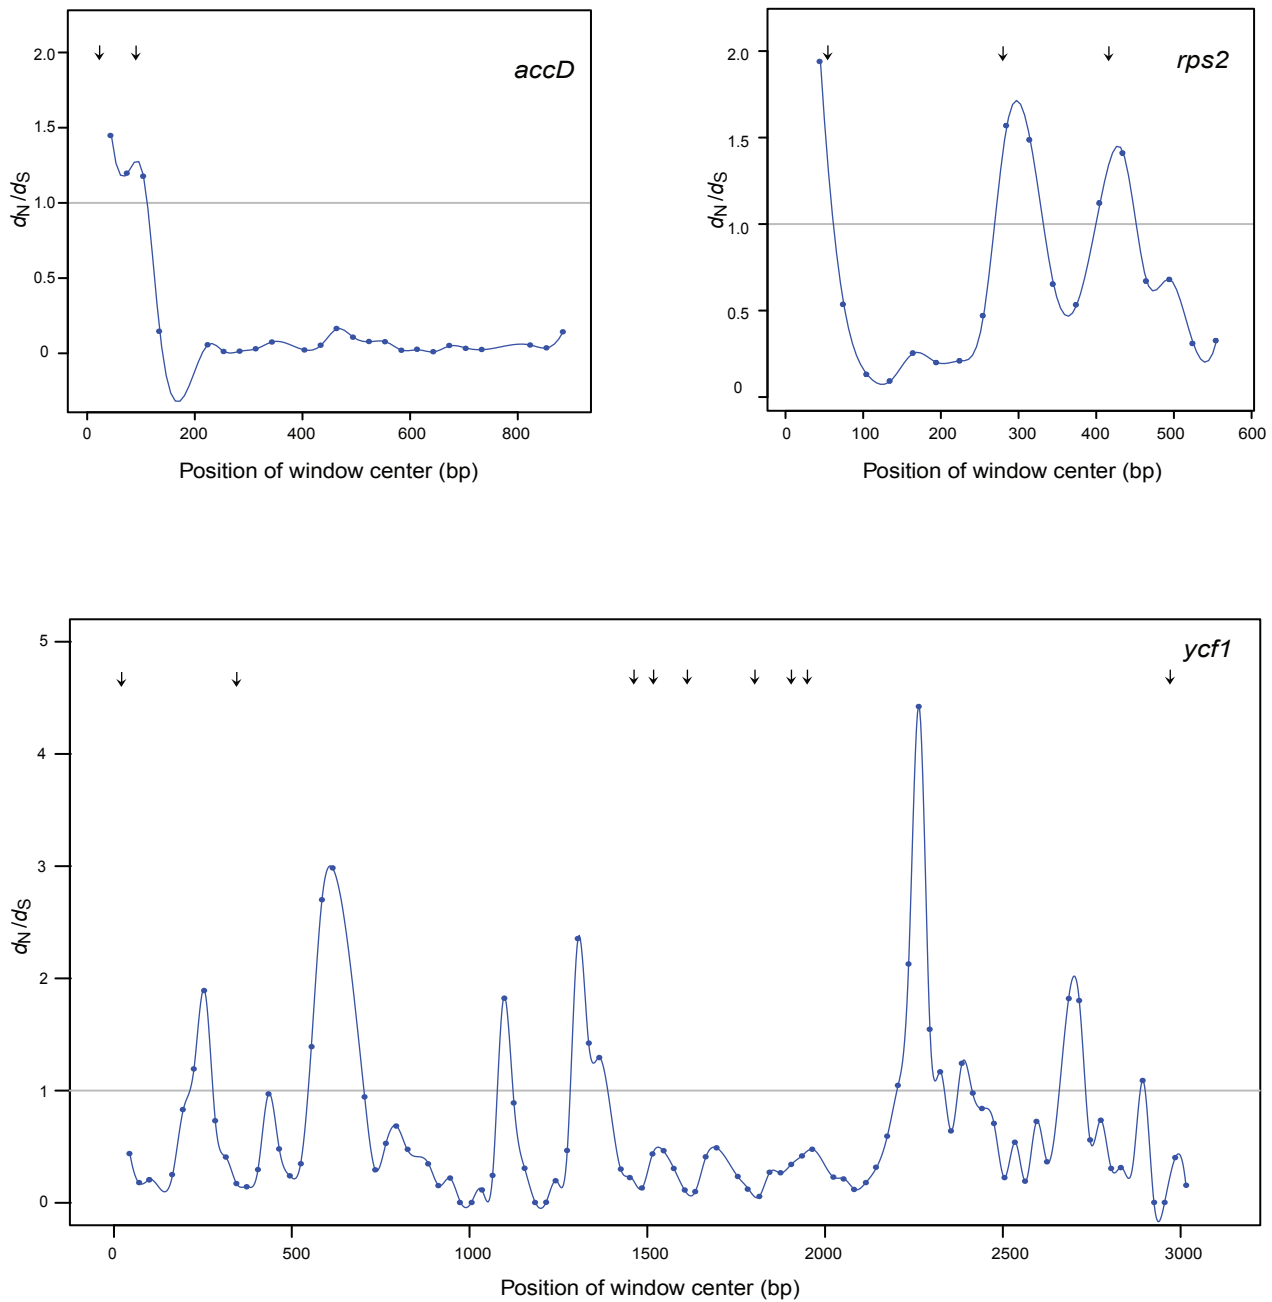

**Figure S9.** Pair-wise  $dN/dS$  ratios from sliding-window analysis (window size = 90 bp; step size = 30 bp) of the *Balanophora accD*, *rps2*, and *ycf1* genes (see Fig. 3C for the same analysis of two other *Balanophora* genes). Arrows mark internal TAG codons present in one or both *Balanophora* plastomes and inferred to encode W.  $dN/dS$  ratios for which  $dS < 0.01$  or  $dS = 99$  are not shown; these correspond to midpoints = 165, 195, 375, 765, and 795 bp for *accD*, and 135, 645, 675, 855, 975, 1005, 1185, 1215, 1395, 1725, 1995, 2655, 2925, and 2955 bp for *ycf1*.

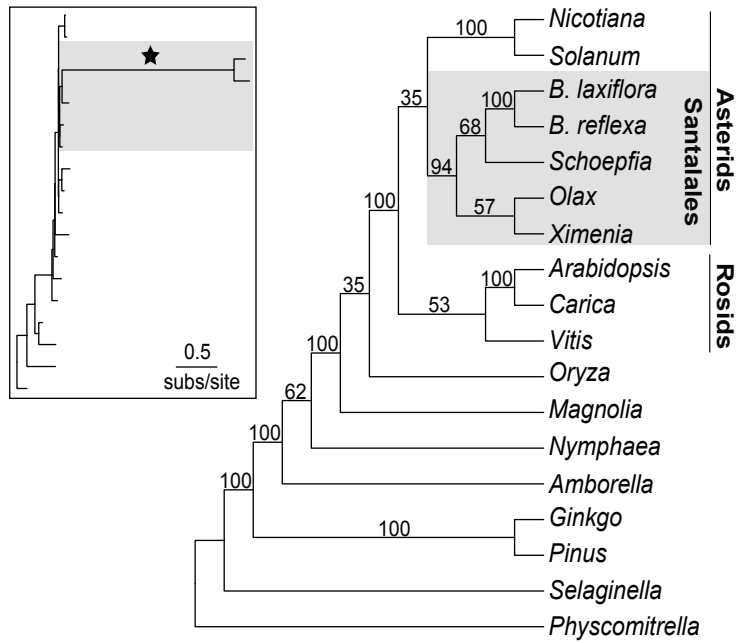

**Figure S10.** *Balanophora* plastid sequences are related to Santalales. The cladogram was estimated from a maximum likelihood analysis of 16 genes (all *Balanophora* genes except for *ycf2*, *rrn4.5* and *trnE*) from the 18 indicated land plants. Bootstrap support is shown above the branches. The star in the corresponding phylogram (see inset) marks the long branch leading to *Balanophora*.



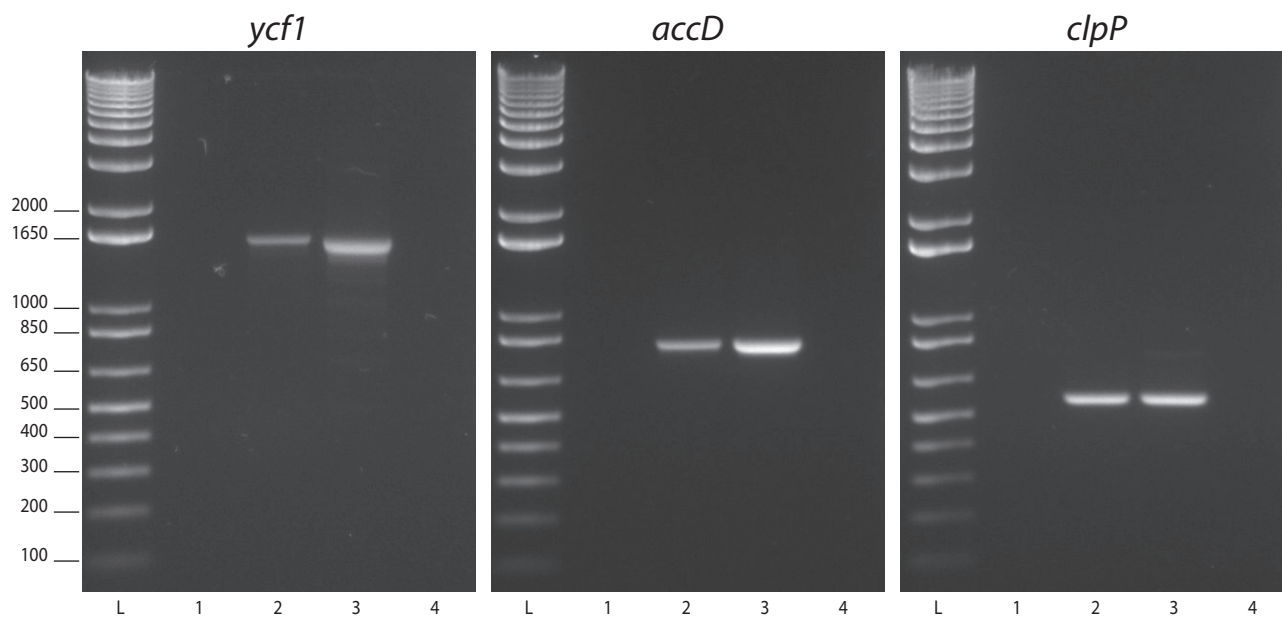

**Figure S11.** PCR analysis of three plastid genes and their transcripts. Templates used in PCR reactions were DNase-treated RNA (lanes 1), reverse transcribed DNase-treated RNA (2), RNase-treated DNA (3), and no template (4). The 1-kb-Plus DNA ladder was used as a length standard (lanes L).

# YCF2 (angiosperms only)

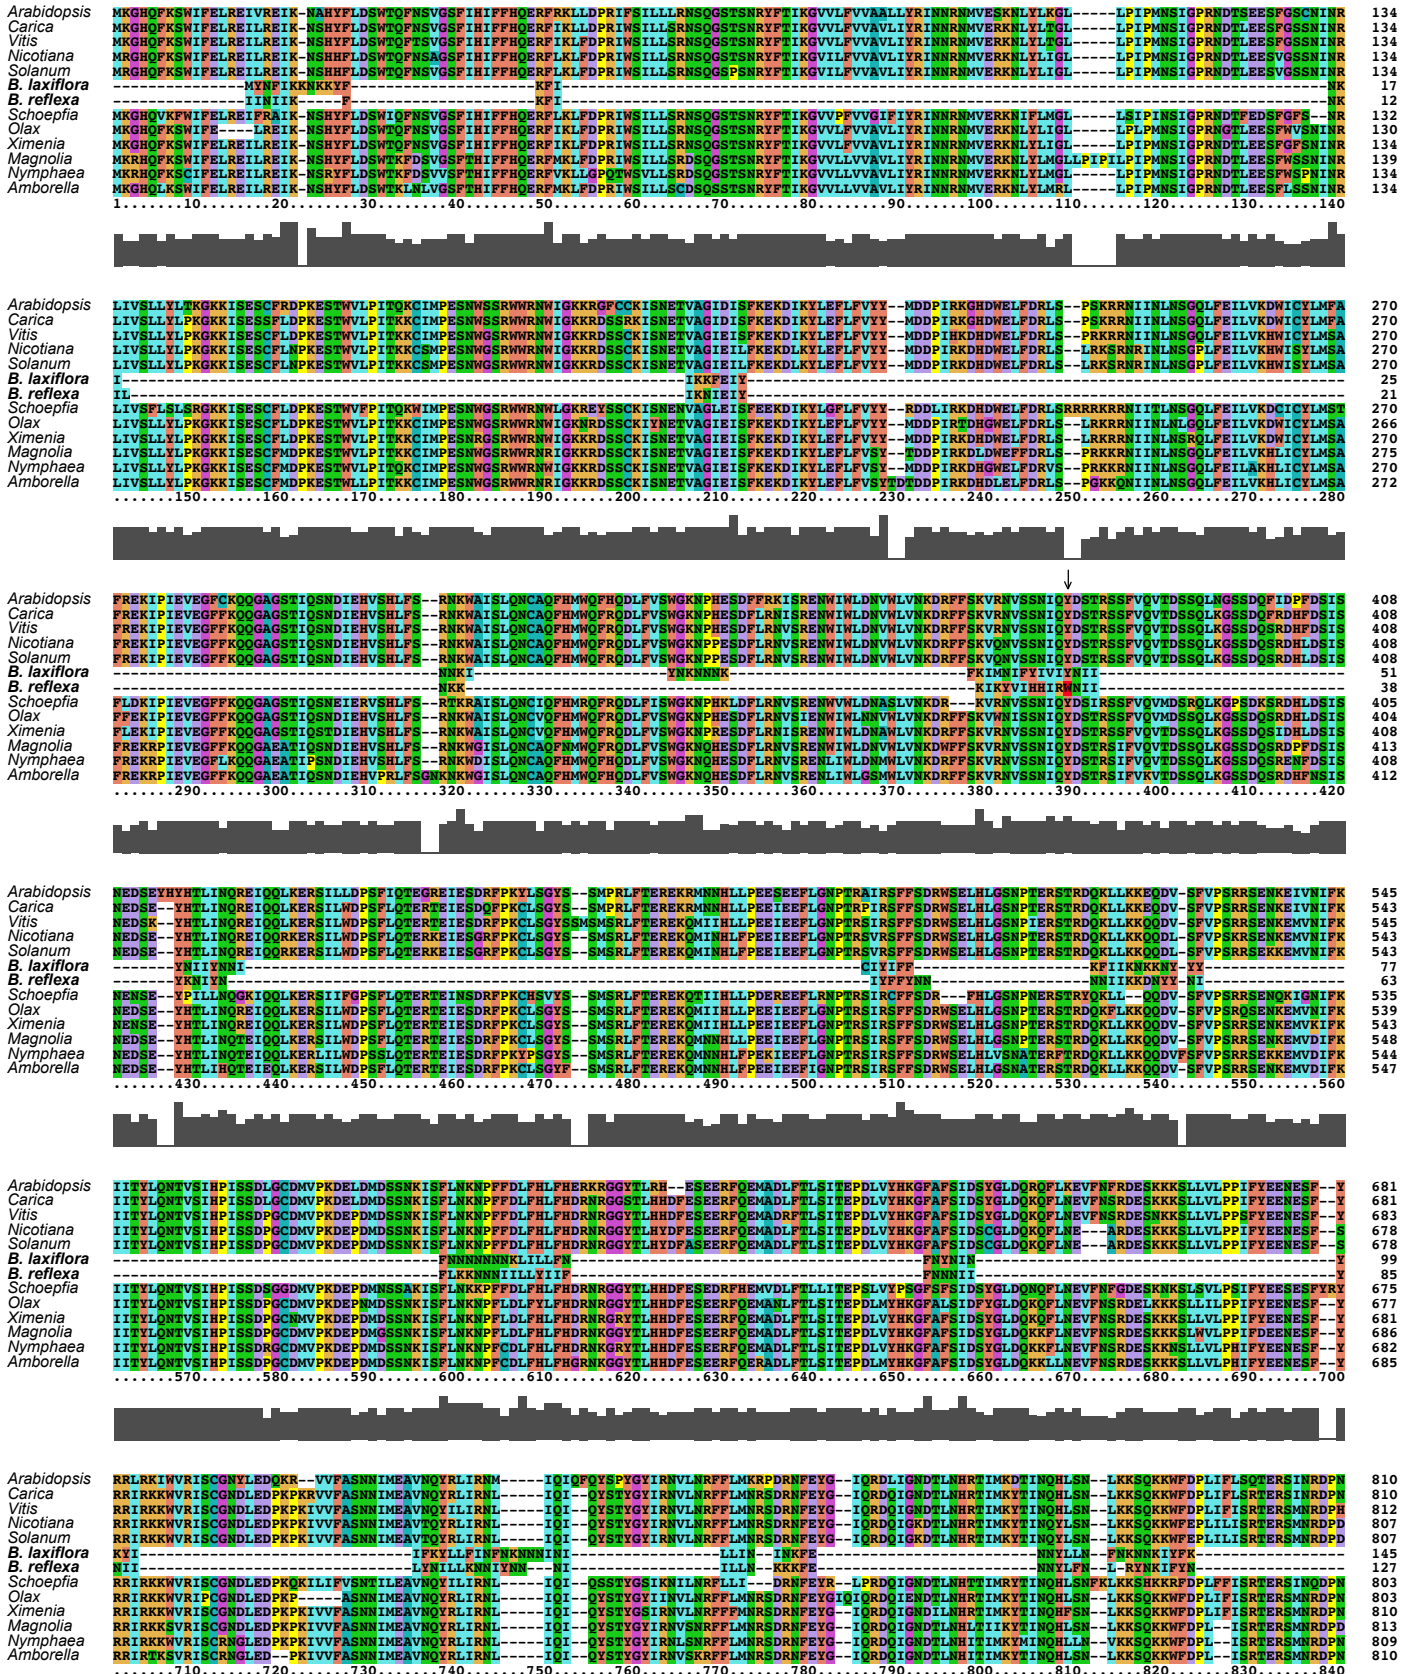

**Figure S12.** Inferred amino acid alignment of YCF2 from *Balanophora* and other angiosperms. Stop codons are shown only for *Balanophora* and are shaded in black to represent TAA. The arrow marks the internal TAG codon present in *B. reflexa* and inferred to encode for white W. Blue lines mark the three motifs identified in 1994 by Wolfe (3) as conserved between YCF2 and the CDC48 family of ATPases (*SI Appendix*, Results). The histograms give the percentage of the aligned sequences that share the most common amino acid at each position.

# YCF2 (angiosperms only)

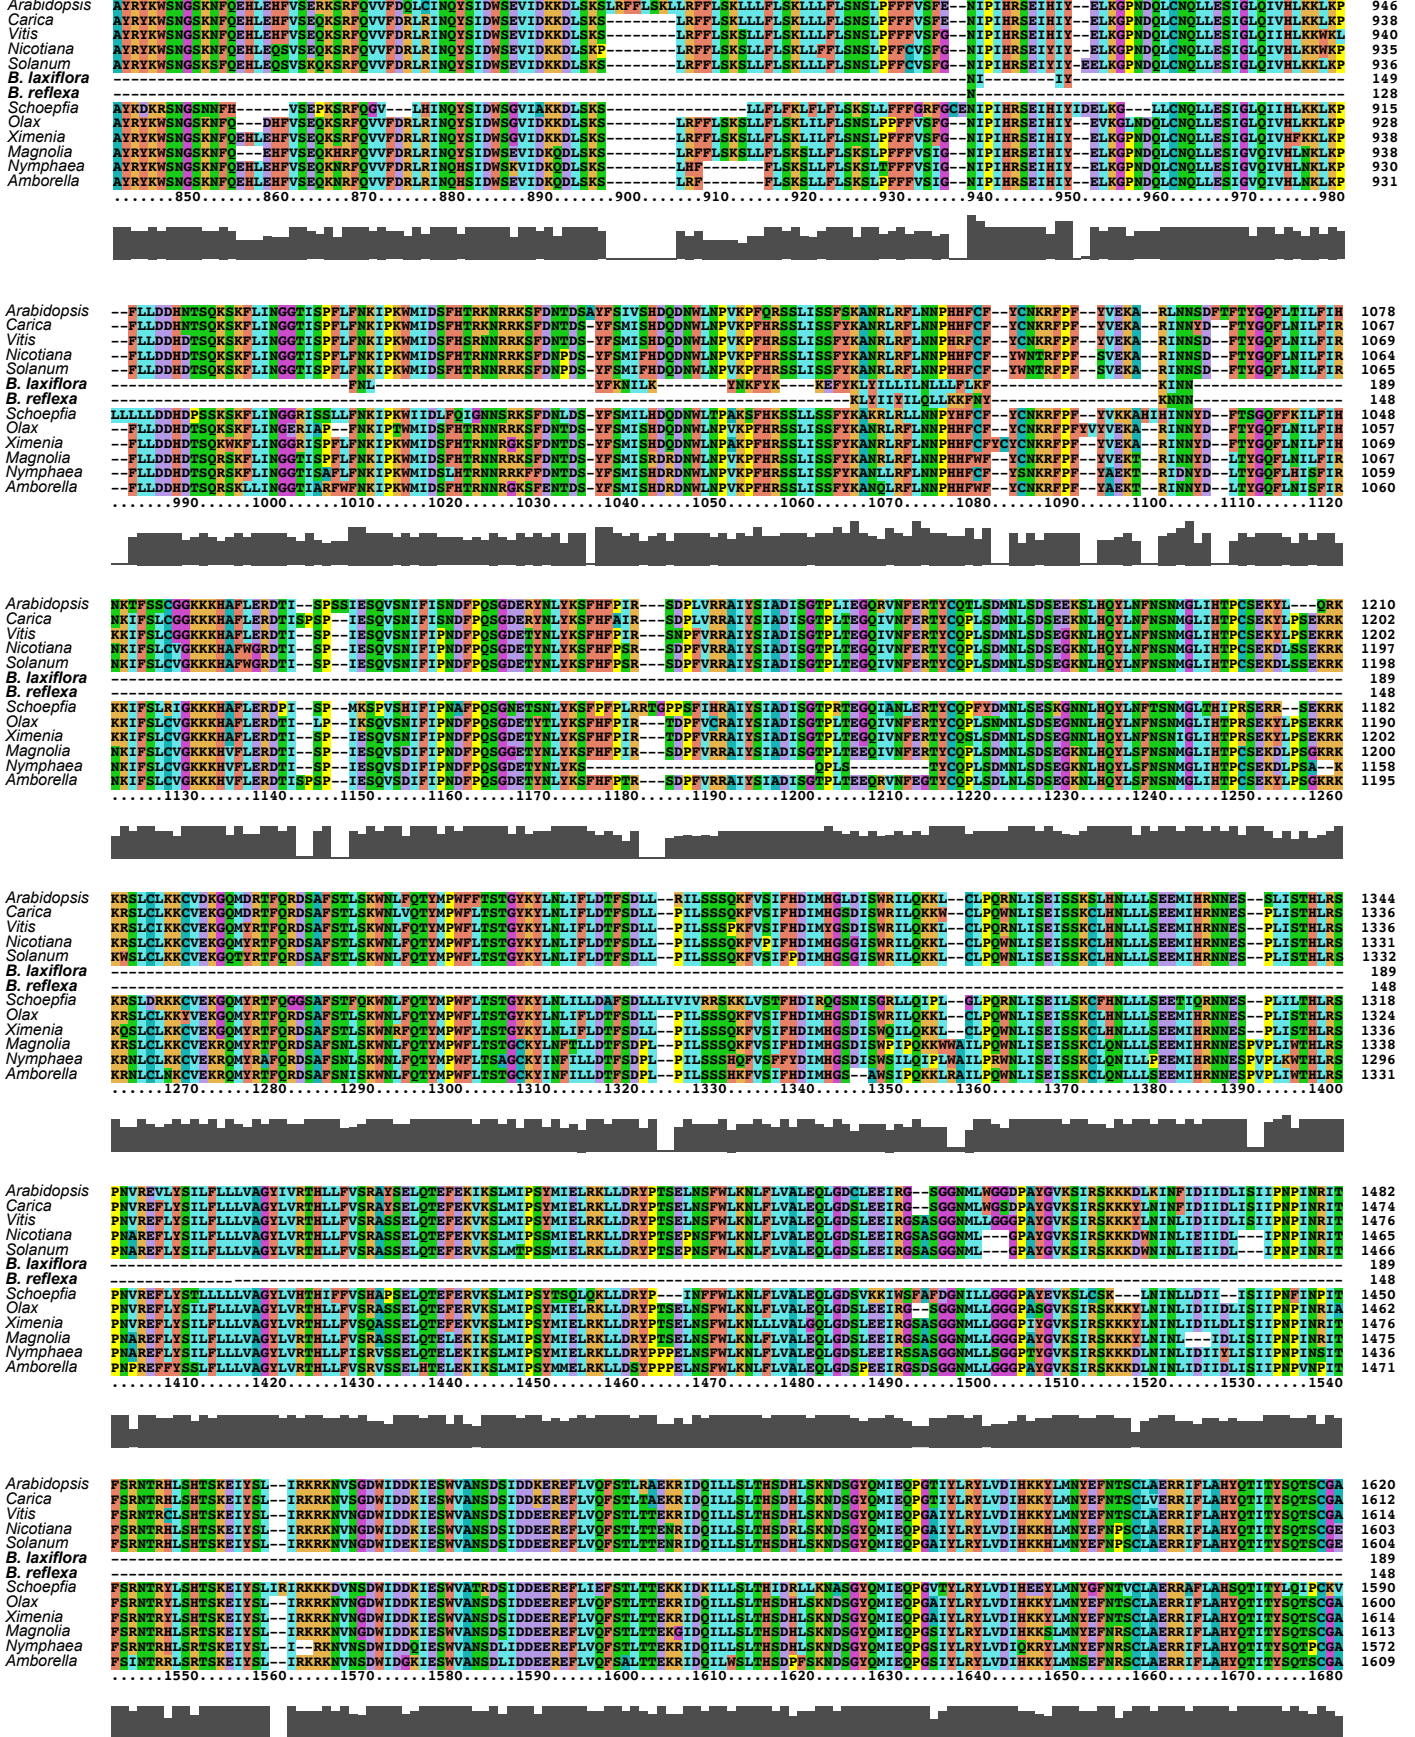

**Figure S12.** (cont.) Inferred amino acid alignment of YCF2 from *Balanophora* and other angiosperms. Stop codons are shown only for *Balanophora* and are shaded in black to represent TAA. The arrow marks the internal TAG codon present in *B. reflexa* and inferred to encode W. Blue lines mark the three motifs identified in 1994 by Wolfe (3) as conserved between YCF2 and the CDC48 family of ATPases (*Si Appendix, Results*). The histograms give the percentage of the aligned sequences that share the most common amino acid at each position.

# YCF2 (angiosperms only)

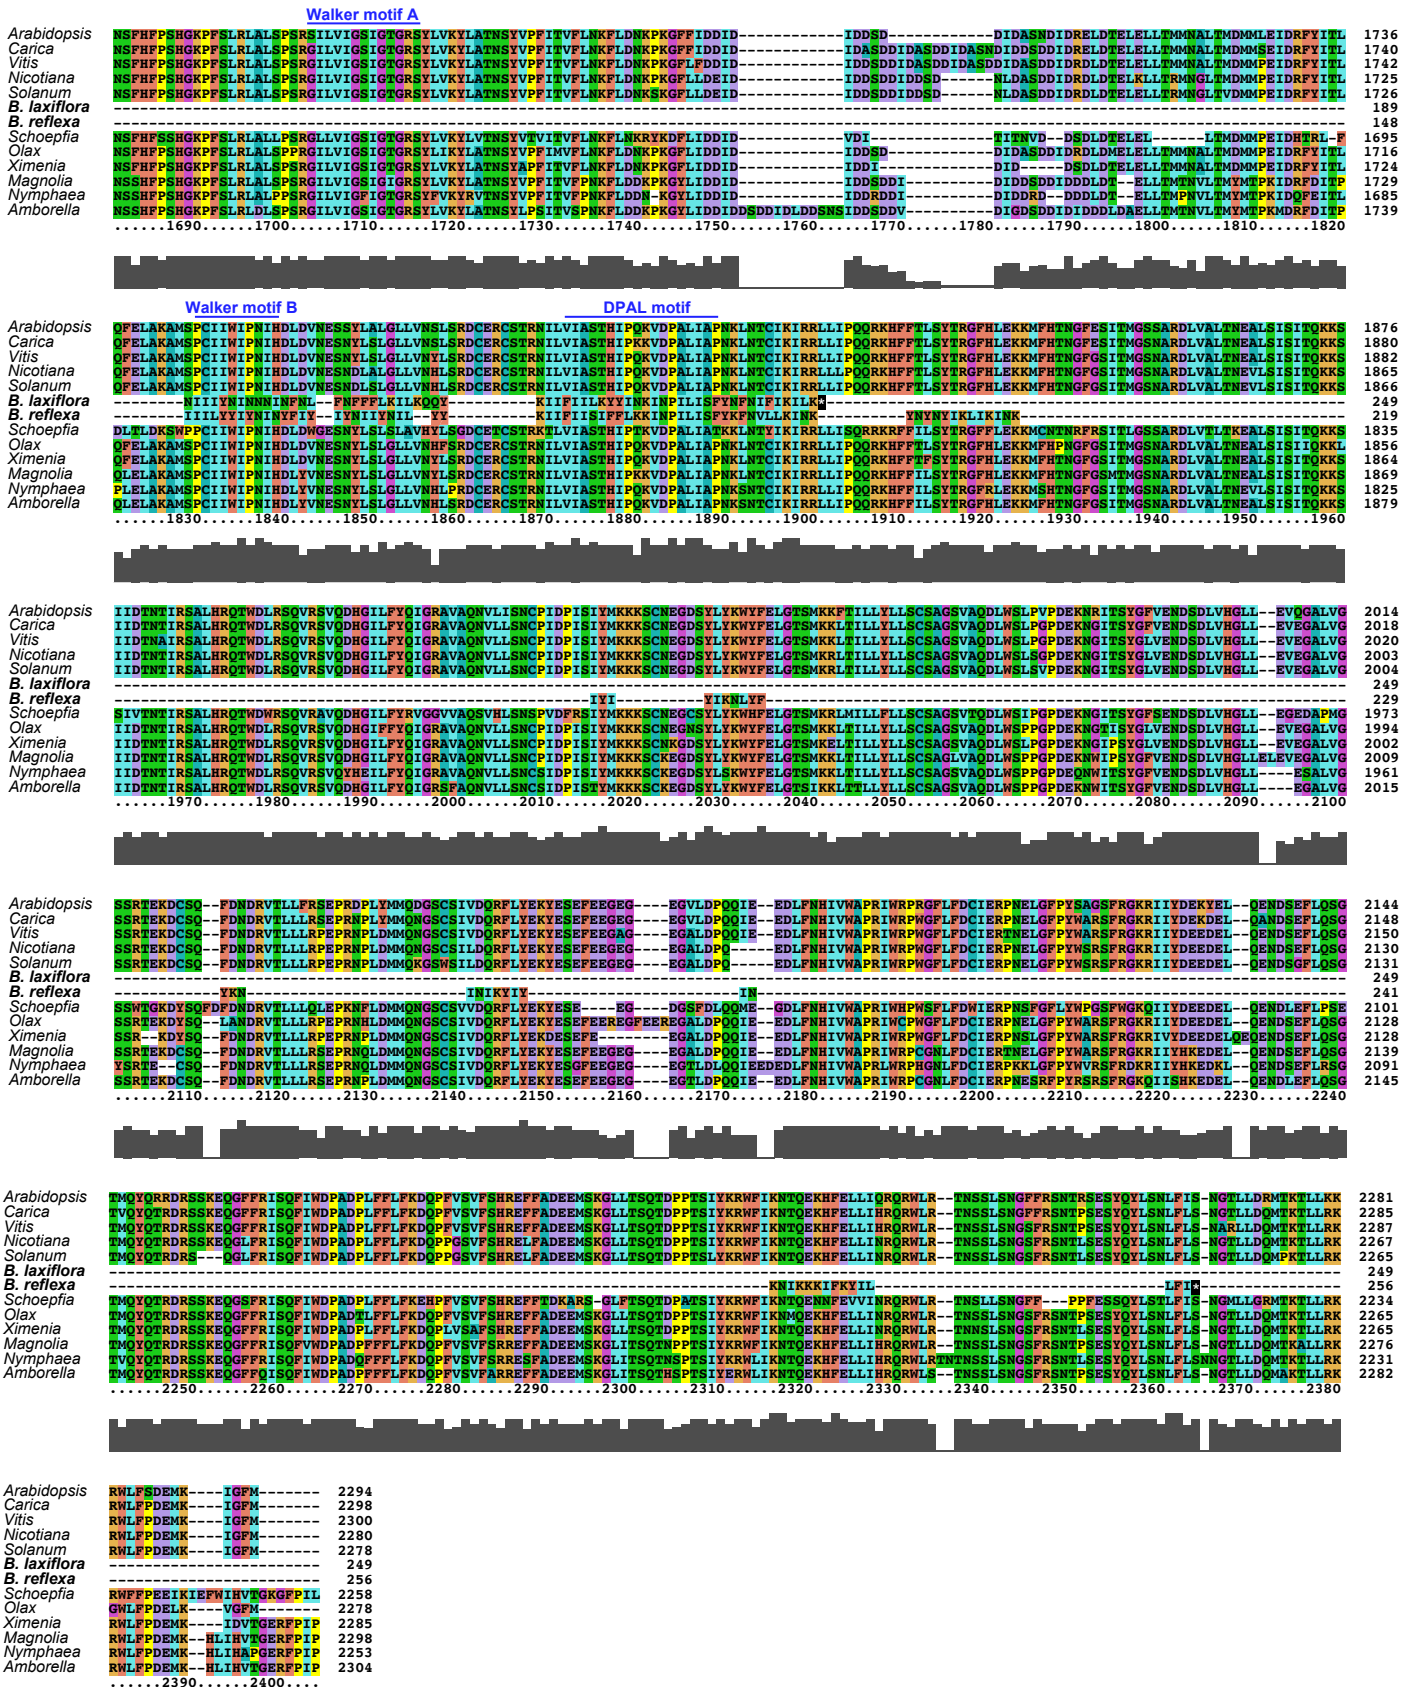

**Figure S12. (cont.)** Inferred amino acid alignment of YCF2 from *Balanophora* and other angiosperms. Stop codons are shown only for *Balanophora* and are shaded in black to represent TAA. The arrow marks the internal TAG codon present in *B. reflexa* and inferred to encode W. Blue lines mark the three motifs identified in 1994 by Wolfe (3) as conserved between YCF2 and the CDC48 family of ATPases (*SI Appendix, Results*). The histograms mark the percentage of the aligned sequences that share the most common amino acid at each position.



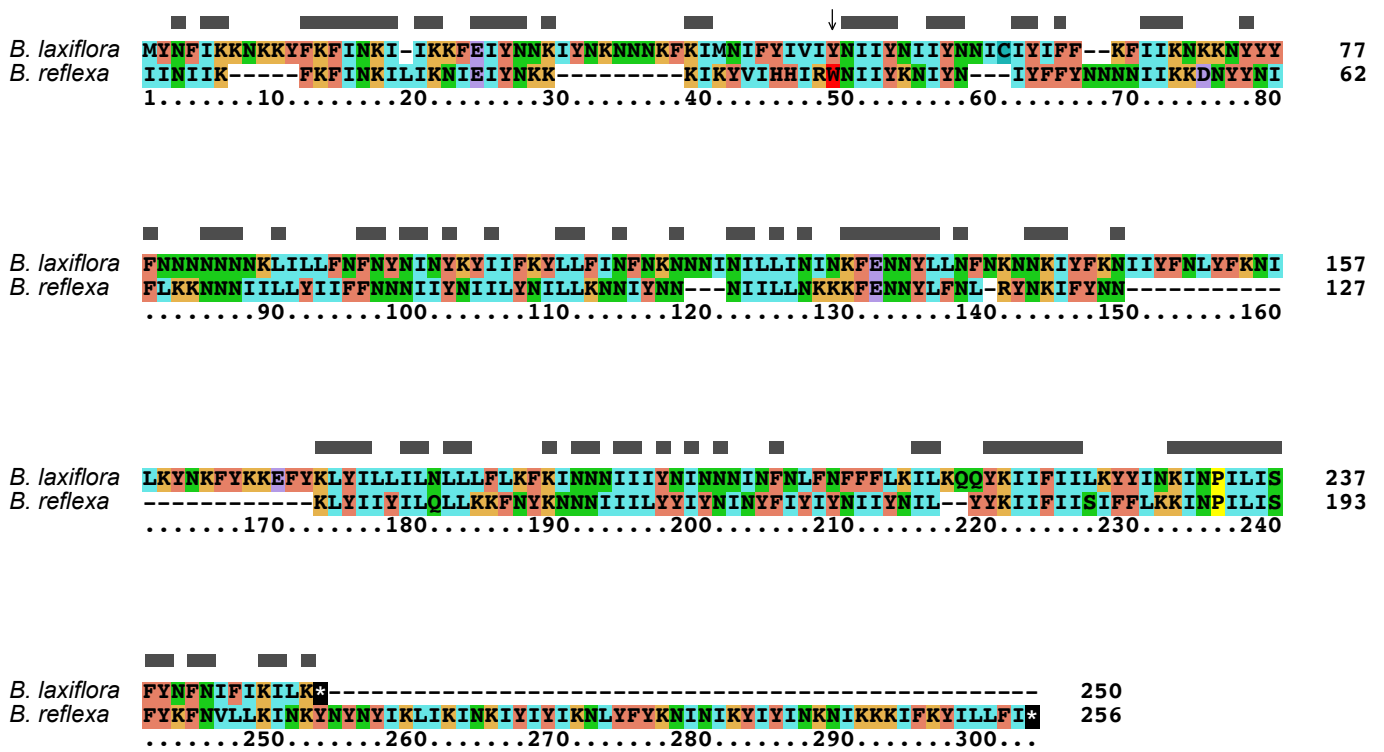

**Figure S13.** Pairwise alignment of YCF2 in *Balanophora*. Identities are marked by squares. The arrow marks the internal TAG codon present in *B. reflexa* and inferred to encode W. Stop codons are shaded in black (TAA).

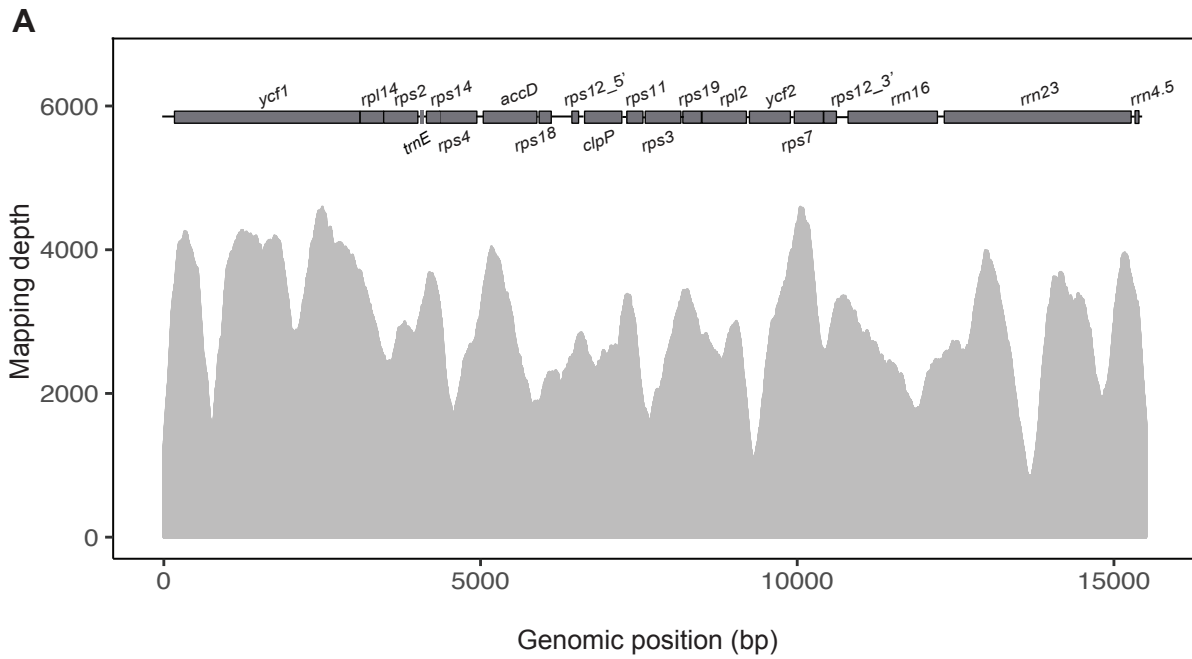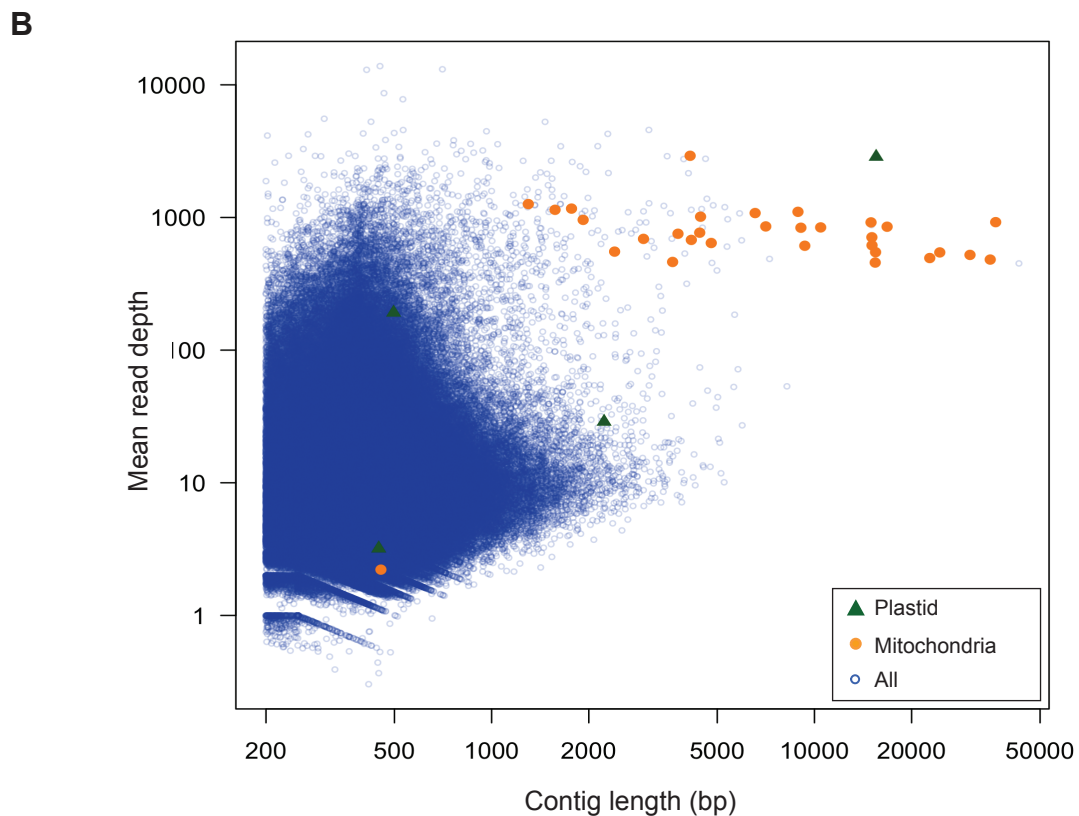

**Figure S14.** Read depth of the *B. laxiflora* assembly. (A) Coverage depth in the Velvet assembly of the raw Illumina reads based on a mapping quality of Q60. (B) Scatter plot of contig lengths for the CLC assembly versus mean read depth. The short plastid fragment is likely to be a nuclear fragment based on its low sequence coverage (see Materials and Methods).
